# Supplementary material for: Tubularenes
Source: PubMed Central journal article supplement — Chem Sci. 2020 Jul 14;11(31):8089–94. doi: 10.1039/d0sc03384g (PMC8163370; doi:10.1039/d0sc03384g), 2020-07-14
Supplement: SC-011-D0SC03384G-s001.pdf [file SC-011-D0SC03384G-s001.pdf]

This version of the ESI published 27/07/2020 replaces the previous version  
published 14/07/2020

**Supplementary Information for:**

## **Tubularenes**

Saber Mirzaei,<sup>†1</sup> Edison Castro,<sup>†1</sup> and Raúl Hernández Sánchez\*<sup>1</sup>

*<sup>1</sup>Department of Chemistry, University of Pittsburgh,  
219 Parkman Ave., Pittsburgh, PA 15260, USA.*

<sup>†</sup>These authors contributed equally

*E-mail: raulhs@pitt.edu*

## Table of Contents

|                                                                                                                                                                                                                   |     |
|-------------------------------------------------------------------------------------------------------------------------------------------------------------------------------------------------------------------|-----|
| <b>Experimental section</b>                                                                                                                                                                                       | S4  |
| <b>Table S1:</b> Crystallographic data for tubular[4,8,8,8]arene ( <b>1</b> ).                                                                                                                                    | S11 |
| <b>Figure S1:</b> $^1\text{H}$ and $^{13}\text{C}$ NMR spectra of compound <b>S2</b> .                                                                                                                            | S12 |
| <b>Figure S2:</b> $^1\text{H}$ NMR spectrum of compound <b>S3</b> .                                                                                                                                               | S13 |
| <b>Figure S3:</b> $^1\text{H}$ and $^{13}\text{C}$ NMR spectra of compound <b>5</b> .                                                                                                                             | S14 |
| <b>Figure S4:</b> $^1\text{H}$ and $^{13}\text{C}$ NMR spectra of compound <b>3</b> .                                                                                                                             | S15 |
| <b>Figure S5:</b> $^1\text{H}$ and $^{13}\text{C}$ NMR spectra of tubularene <b>1</b> .                                                                                                                           | S16 |
| <b>Figure S6:</b> COSY NMR spectrum of tubularene <b>1</b> .                                                                                                                                                      | S17 |
| <b>Figure S7:</b> DOSY NMR spectrum of tubularene <b>1</b> .                                                                                                                                                      | S18 |
| <b>Figure S8:</b> $^1\text{H}$ and $^{13}\text{C}$ NMR spectra of tubularene <b>2</b> .                                                                                                                           | S19 |
| <b>Figure S9:</b> COSY NMR spectrum of tubularene <b>2</b> .                                                                                                                                                      | S20 |
| <b>Figure S10:</b> DOSY NMR spectrum of tubularene <b>2</b> .                                                                                                                                                     | S21 |
| <b>Figure S11:</b> Interior cavity measurements of tubularene <b>1</b> .                                                                                                                                          | S22 |
| <b>Figure S12:</b> Surface (in red) of the solvent accessible volume of tubularene <b>1</b> calculated in Olex2.                                                                                                  | S23 |
| <b>Figure S13:</b> Homodesmotic reactions for the calculation of strain energies of A) tubularene <b>1</b> and <b>2</b> , and B) <b>[8]CPP</b> .                                                                  | S24 |
| <b>Table S2:</b> Strain energies ( $\Delta\text{H}$ , in kcal/mol) of <b>1</b> , <b>2</b> , and <b>[8]CPP</b> .                                                                                                   | S24 |
| <b>Figure S14:</b> Nucleus-independent chemical shifts (NICS) in <b>1</b> .                                                                                                                                       | S25 |
| <b>Figure S15:</b> Dihedral angle ( $\theta$ ) change between the highlighted aromatic rings of the (left) DFT optimized structure of tubularene <b>1</b> and (right) transition state (TS) during ring flipping. | S26 |
| <b>Table S3:</b> DFT calculated thermochemistry of ring flipping in <b>1</b> .                                                                                                                                    | S26 |
| <b>Table S4:</b> DFT calculated thermochemistry of ring flipping in <b>1</b> .                                                                                                                                    | S27 |
| <b>Figure S16:</b> DFT optimized structure of tubularene <b>1</b> .                                                                                                                                               | S28 |
| <b>Figure S17:</b> DFT optimized structure of tubularene <b>2</b> .                                                                                                                                               | S29 |

|                                                                                                                   |     |
|-------------------------------------------------------------------------------------------------------------------|-----|
| <b>Table S5:</b> TD-DFT calculations of absorption transitions for tubularene <b>1</b> and <b>2</b> .             | S30 |
| <b>Figure S18:</b> HOMO and LUMO of tubularene <b>1</b> calculated by DFT.                                        | S31 |
| <b>Figure S19:</b> HOMO and LUMO of tubularene <b>2</b> calculated by DFT.                                        | S32 |
| <b>Table S6:</b> Calculated HOMO and LUMO energy levels for tubularene <b>1</b> and <b>2</b> .                    | S33 |
| <b>Figure S20:</b> Spin density distribution plots of the ground state of $[1]^{+\bullet}$ and $[1]^{-\bullet}$ . | S34 |
| <b>Figure S21:</b> Electron transfer series for tubularenes <b>1</b> and <b>2</b> .                               | S35 |
| <b>Table S7:</b> Calculated $^1\text{H}$ NMR of tubularene <b>1</b> by DFT.                                       | S36 |
| <b>Table S8:</b> Calculated $^1\text{H}$ NMR of tubularene <b>2</b> by DFT.                                       | S37 |
| <b>Cartesian coordinates of all DFT optimized molecules.</b>                                                      | S38 |
| <b>References</b>                                                                                                 | S50 |

## Experimental section

**General considerations.** All reactions were performed in oven-dried or flame-dried round bottom flasks, unless otherwise noted. The flasks were fitted with Teflon magnetic stir bar, rubber septa and/or reflux condenser, under a positive pressure of nitrogen, unless otherwise noted. Anhydrous and anaerobic THF, diethyl ether, hexane, dichloromethane, and benzene were dried and deoxygenated on dual high-performance columns within a Glass Contour 800L Solvent Purification System. Anhydrous and anaerobic *ortho*-dichlorobenzene was purchased from Sigma Aldrich (sure-seal bottle).

$^1\text{H}$  and  $^{13}\text{C}$  NMR spectra were recorded on Bruker Avance III 400 MHz or Bruker Avance III 600 MHz. Chemical shifts for protons are reported in parts per million (ppm) downfield from tetramethylsilane (TMS) and are reference to residual protium in the NMR solvent ( $\text{CHCl}_3$ :  $\delta$  7.26;  $\text{CH}_2\text{Cl}_2$ :  $\delta$  5.32;  $(\text{CH}_3)_2\text{SO}$ :  $\delta$  2.50; and  $\text{CH}_3\text{OH}$ :  $\delta$  4.78, 3.31). Chemical shifts for carbon are reported in ppm downfield from TMS and are referenced to the carbon resonances of the solvent ( $\text{CHCl}_3$ :  $\delta$  77.0;  $\text{CH}_2\text{Cl}_2$ :  $\delta$  54.0;  $(\text{CH}_3)_2\text{SO}$ :  $\delta$  39.51; and  $\text{CH}_3\text{OH}$ :  $\delta$  49.1. Data is presented as follows: chemical shift, multiplicity (s = singlet, d = doublet, t = triplet, m = multiplet, br = broad), coupling constants in Hertz, and integration. Some  $^1\text{H}$  NMR and  $^{13}\text{C}$  NMR were recorded at high temperatures to enhance signal resolution in the aromatic region. Resonances corresponding to the numerous aromatic carbon atoms in the reported compounds sometimes overlap, thereby reducing the number of observed resonances.

High-resolution mass spectrometry (HRMS) was performed on a (1) Thermo Scientific Q-Exactive Orbitrap instrument equipped with a Dionex Ultimate 3000 (RSLC) inlet system, and electrospray (ESI) and atmospheric pressure chemical (APCI) ionization sources; or (2) a Bruker Daltonics UltrafleXtreme MALDI TOF/TOF MS instrument using dithranol (DIT) matrix.

Absorption spectra were obtained on a Cary 60 UV-Vis spectrophotometer and emission spectra were recorded in a HORIBA Jobin Yvon Fluoromax-3 spectrofluorometer.

Electrochemical data (cyclic voltammetry and differential pulse voltammetry) were recorded on a CHI760E bipotentiostat using a three-electrode cell setup with a 1 mm diameter glassy carbon working electrode, Pt wire counter electrode, and Ag wire as reference electrode. All measurements were done under a dinitrogen atmosphere and at room temperature. A 0.1 M

solution of tetrabutylammonium hexafluorophosphate, [*n*-Bu<sub>4</sub>N][PF<sub>6</sub>], in *ortho*-dichlorobenzene was used as the supporting electrolyte. Data was referenced to Fc/Fc<sup>+</sup> by introducing ferrocene in the same solution. The energy level values of the lowest unoccupied molecular orbitals (LUMO) were calculated according to the following equation:  $E_{LUMO} = [E_{1/2}(\text{first reduction}) - 4.80] \text{ eV}$ .

Single crystal data for tubular[4,8,8,8]arene (**1**) was collected on a Bruker X8 Prospector Ultra diffractometer equipped with an APEX II CCD detector and an I $\mu$ S microfocus Cu K $\alpha$  X-ray source ( $\lambda = 1.54178 \text{ \AA}$ ). Temperature was maintained using an Oxford Cryosystem nitrogen flow apparatus. Single crystals of **1** suitable for X-ray structure analysis were coated with Paratone N-oil and mounted on MiTeGen Kapton loops (polyimide). Data for compound **1** was collected at 150 K. Raw data were integrated and corrected for Lorentz and polarization effects using Bruker APEX3.<sup>1</sup> Absorption corrections were applied using SADABS.<sup>2</sup> Space group assignments were determined by examination of systematic absences, E-statistics, and successive refinement of the structures. The program PLATON<sup>3, 4</sup> was employed to confirm the absence of higher symmetry for any of the crystals. The positions of the heavy atoms were determined using intrinsic phasing methods using the program SHELXT<sup>5</sup> and SHELXL<sup>6</sup> with Olex2<sup>7</sup> interface. Successive cycles of least-square refinement followed by difference Fourier syntheses revealed the positions of the remaining non-hydrogen atoms. Non-hydrogen atoms were refined with anisotropic displacement parameters, and hydrogen atoms were added in idealized positions. Crystallographic data for **1** is given in Table S1. The cavity size of **1** was calculated from the solvent accessible volume calculator in Olex2. By employing this functionality, we found a discrete pocket within the interior of **1** of 265.9  $\text{\AA}^3$  (Probe 1.2  $\text{\AA}$ , grid 0.25  $\text{\AA}$ ).

**Synthesis details.** Compounds **S1**,<sup>8</sup> **S2**,<sup>9</sup> and **4**<sup>10</sup> were obtained according to published procedures.

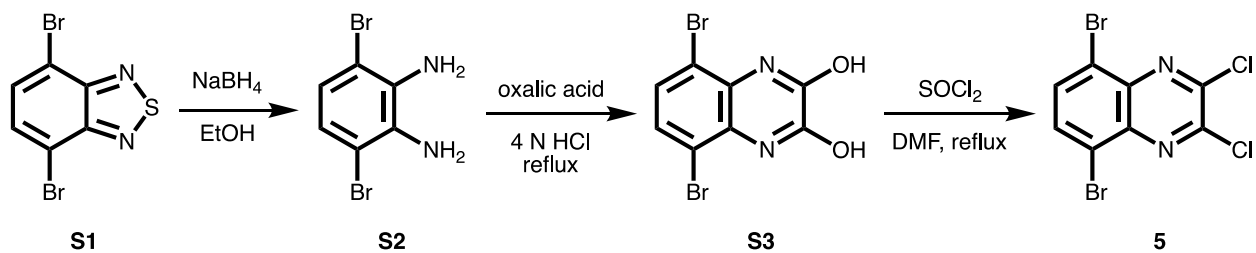

**Compound S3.** A 500 mL round bottom flask was loaded with 10 g (37.6 mmol) of **S2** in 150 mL of 4 N HCl. The first portion of oxalic acid (2.5 g, 27.8 mmol) was added and the reaction mixture was refluxed for 6 h. Then a second portion of oxalic acid (2.5 g, 27.8 mmol) was added and the mixture refluxed overnight (~12 h). The solution mixture was cooled down to room temperature and vacuum filtered. The filtrate was washed several times with copious amounts of deionized water and dried in air to obtain a brown solid. The product was used in the next step without further purifications. Yield: 52% (6.3 g, 19.7 mmol).  $^1\text{H}$  NMR (400 MHz,  $\text{DMSO-}d_6$ , 20 °C): 7.32 (2H, s), 11.03 (2H, s).

**Compound 5.** A 500 mL flask was loaded with 5 g (15.6 mmol) of **S3** in 100 mL of thionyl chloride. After stirring for 5 min at room temperature, 1 mL of dimethyl formamide (DMF) was added dropwise. The reaction mixture was refluxed for 5 h and then cooled down to room temperature. The reaction mixture was dried under vacuum (caution: thionyl chloride has a very strong odor, consider setting up the rotary evaporator in a well-ventilated hood). The solid was washed several times with copious amounts of deionized water and 100 mL of MeOH, subsequently it was dried in air. The pure product (pale yellow solid) was obtained by flash column using a pure DCM. Yield: 63% (3.5 g, 9.9 mmol).  $^1\text{H}$  NMR (400 MHz,  $\text{DMSO-}d_6$ , 20 °C): 8.20.  $^{13}\text{C}$  NMR (100 MHz,  $\text{DMSO-}d_6$ , 20 °C): 121.3, 135.0, 138.7, 146.9.  $\text{C}_8\text{H}_3\text{N}_2\text{Br}_2\text{Cl}_2$ , HRMS (calculated): 354.80346, HRMS (exp.): 354.80278.

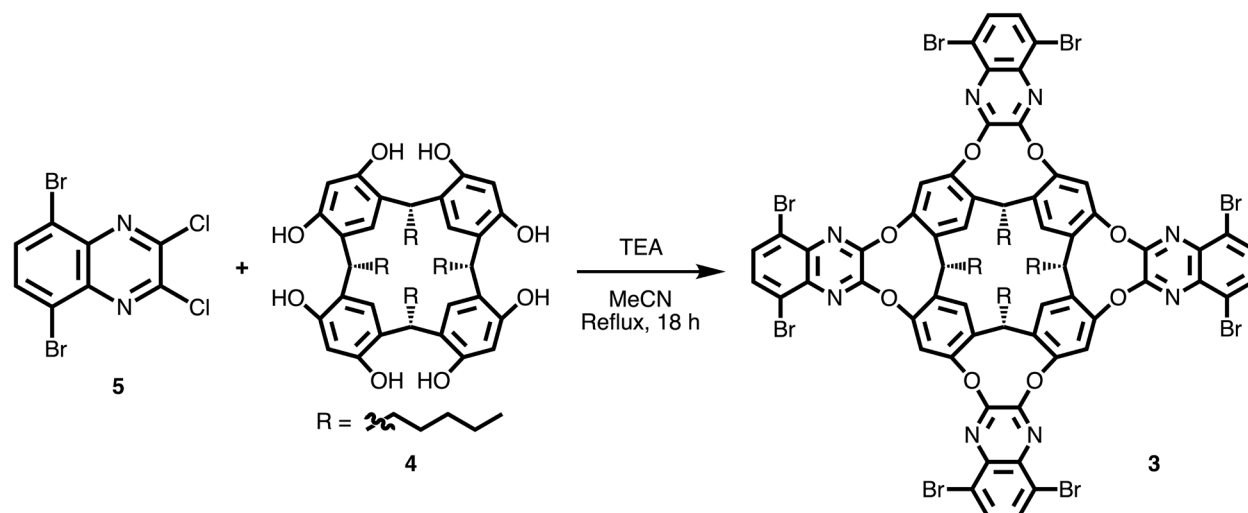

Compound **3**. A 500 mL round bottom flask was loaded with 1.5 g of **4** (2 mmol) and 2.9 g of **5** (8.2 mmol, 4.1 eq) in 100 mL of acetonitrile. Triethylamine (TEA, 5.6 mL, 40 mmol, 20 eq) was added to the latter solution dropwise over 10 min. The reaction mixture was refluxed overnight (~12 h). The reaction mixture was cooled down to room temperature followed by removal of solvent under vacuum. A brown solid was obtained and washed with 200 mL of MeOH. This brown solid was dried in air. The pure product (beige powder) is obtained after passing the crude product through a flash column starting with DCM/Hexanes (1:1) and moving to pure DCM as the eluent. Yield: 57% (2.17 g, 1.14 mmol).  $^1\text{H}$  NMR (400 MHz,  $\text{DMSO-}d_6$ , 100  $^\circ\text{C}$ ): 0.67 (12H, broad), 1.07 (24H, broad), 2.10 (8H, broad), 3.63 (4H, t), 7.05 (4H, s), 7.42 (4H, s), 7.84 (8H, s).  $^{13}\text{C}$  NMR (100 MHz,  $\text{DMSO-}d_6$ , 100  $^\circ\text{C}$ ): 12.9, 21.2, 25.5, 29.9, 30.1, 36.4, 112.9, 119.8, 124.4, 130.9, 132.2, 135.8, 148.3, 151.7.  $\text{C}_{80}\text{H}_{64}\text{Br}_8\text{N}_8\text{O}_8$ , HRMS ( $[(\text{M}+\text{H})/\text{z}]^+$  calculated): 1904.8305, HRMS (exp.): 1904.8298.

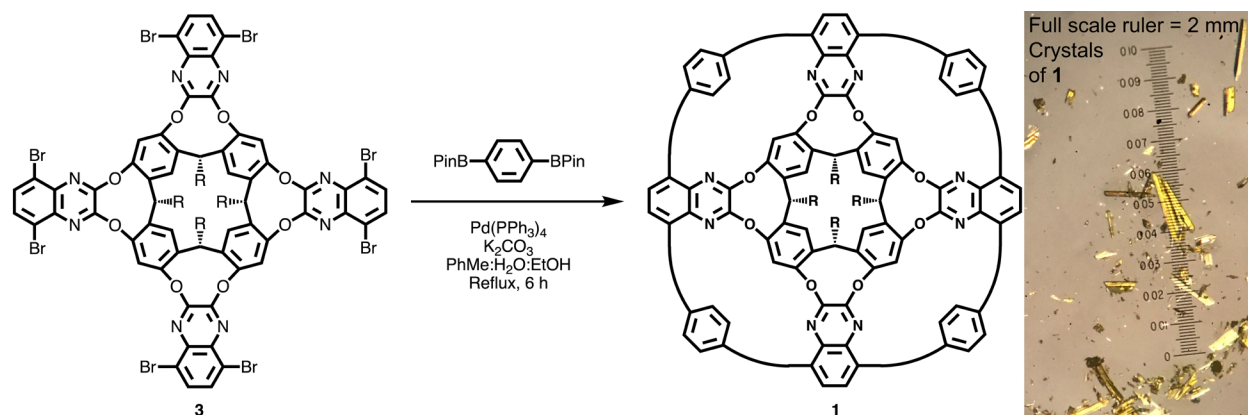

Tubular[4,8,8,8]arene (**1**). A Pyrex Schlenk flask was loaded with 0.3 g of **3** (0.16 mmol), 0.3 g of 1,4-benzenediboronic acid bis(pinacol) ester (0.9 mmol, 5.6 eq), and 1.2 g of K<sub>2</sub>CO<sub>3</sub> in 250 mL of toluene, 25 mL of water and 25 mL of EtOH. The reaction mixture was degassed for 30 min while stirring vigorously at room temperature. To this mixture, 0.18 g of Pd(PPh<sub>3</sub>)<sub>4</sub> (0.16 mmol, 1 eq) was added. This amount of catalyst forms 8 C-C bonds, thus representing ~0.12 mol% for each bond formation. The solution was degassed again for an additional 15 min while gradually increasing the temperature to reflux. Then, the reaction mixture was refluxed under N<sub>2</sub> atmosphere overnight (~12 h). This reaction was repeated three times. The solvent was removed under vacuum and the resulting dark black solid passed through a flash column using 70% DCM in hexanes. The final product was purified using 40% DCM in hexanes by preparatory TLC. Yield: 1.3% (0.011 g, 0.006 mmol). High quality crystals were grown by slow evaporation of a DCM/MeCN (1:1) solution of **1**. <sup>1</sup>H NMR (400 MHz, CD<sub>2</sub>Cl<sub>2</sub>, 20 °C): 0.96 (12H, t), 1.41 (24H, m), 2.34 (8H, q), 5.80 (4H, t), 6.78 (8H, s), 7.40 (4H, s), 7.74 (4H, s), 8.11 (8H, s), 8.75 (8H, s). <sup>13</sup>C NMR (100 MHz, CD<sub>2</sub>Cl<sub>2</sub>, 20 °C): 14.5, 23.3, 28.3, 30.3, 32.5, 34.5, 117.4, 124.3, 128.3, 129.4, 134.6, 136.1, 137.1, 139.2, 139.8, 150.2, 152.0. C<sub>104</sub>H<sub>80</sub>N<sub>8</sub>O<sub>8</sub>, HRMS ([M/z]<sup>+</sup> calculated): 1569.6172, HRMS (exp.): 1569.6179.



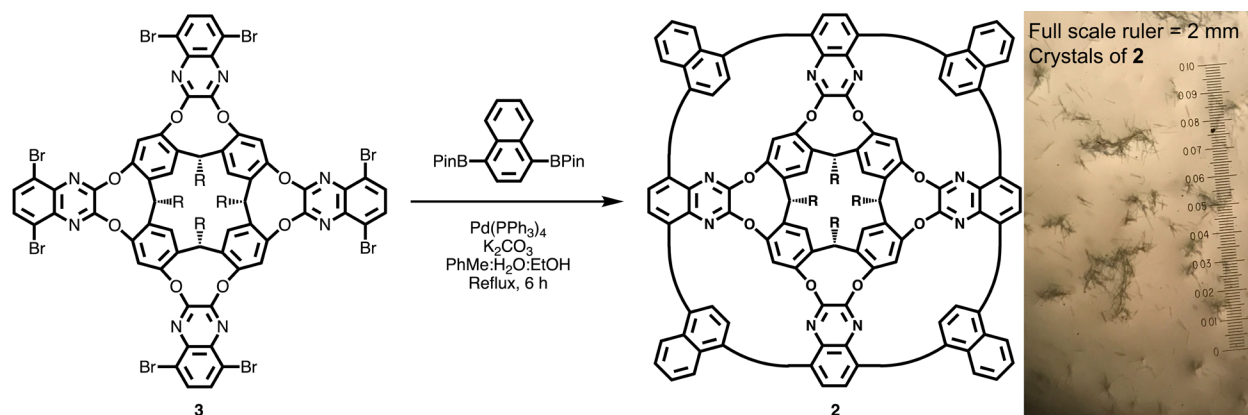

Tubular[4,8,8,12]arene (**2**). A Pyrex Schlenk flask was loaded with 0.3 g of **3** (0.16 mmol), 0.34 g of 1,4-naphthalenediboronic acid bis(pinacol) ester (0.9 mmol, 5.6 eq), and 1.2 g of  $\text{K}_2\text{CO}_3$  in 250 mL of toluene, 25 mL of water and 25 mL of EtOH. The reaction mixture was degassed for 30 min while stirring vigorously at room temperature. To this mixture, 0.18 g of  $\text{Pd}(\text{PPh}_3)_4$  (0.16 mmol, 1 eq) was added. This amount of catalyst forms 8 C-C bonds, thus representing  $\sim 0.12$  mol% for each bond formation. The solution was degassed again for an additional 15 min while gradually increasing the temperature to reflux. Then, the reaction mixture was refluxed under  $\text{N}_2$  atmosphere overnight ( $\sim 12$  h). This reaction was repeated three times. The solvent was removed under vacuum and the resulting dark black solid passed through a flash column using 70% DCM in hexanes. The final product was purified using 50% DCM in hexanes by preparatory TLC. Yield: 0.8% (0.007 g, 0.004 mmol).  $^1\text{H}$  NMR (400 MHz,  $\text{CD}_2\text{Cl}_2$ , 20  $^\circ\text{C}$ ): 0.88 (24H, t), 2.08 (16H, q), 5.45 (4H, t), 5.98 (4H, s), 6.55 (8H, s), 7.07 (4H, s), 7.62 (8H, m), 8.30 (8H, s), 8.41 (8H, m).  $^{13}\text{C}$  NMR (100 MHz,  $\text{CD}_2\text{Cl}_2$ , 20  $^\circ\text{C}$ ): 14.4, 23.2, 28.1, 30.2, 32.3, 32.5, 116.5, 123.8, 125.1, 130.2, 133.1, 133.4, 136.6, 138.3, 139.5, 141.3, 150.1, 151.5.  $\text{C}_{120}\text{H}_{88}\text{N}_8\text{O}_8$ , HRMS ( $[\text{M}/z]^+$  calculated): 1769.6798, HRMS (exp.): 1769.6634.

**Computational details.** All calculations were carried out using Gaussian 16 software package.<sup>11</sup> Four different hybrid functionals, long-range corrected ( $\omega$ B97XD),<sup>12</sup> meta-GGA (M06-2X),<sup>13</sup> meta-NGA (MN15),<sup>14</sup> and GGA (B3LYP)<sup>15</sup> of density functional theory (DFT) were used for all optimizations and subsequent studies. The frequency calculations were carried out for all optimized structures to ensure the absence of any imaginary frequencies for the ground state molecules. The intrinsic reaction coordinate (IRC) calculation is carried out, in addition to the presence of one imaginary frequency, for the transition state structures. In order to include the dispersion effects, the D3 version of Grimme with Becke-Johnson damping factors (D3BJ) were used for the B3LYP functional.<sup>16</sup> The double-zeta quality basis set (6-31G\*) was used for all calculations. The implicit solvation effects were included using the integral equation formalism variant of the polarizable continuum model (IEF-PCM) with standard parameters of dichloromethane (CH<sub>2</sub>Cl<sub>2</sub>).<sup>17</sup> The gauge-independent atomic orbital (GIAO) method<sup>18</sup> was used for <sup>1</sup>H NMR chemical shift calculations. The calculated chemical shieldings were scaled with <sup>1</sup>H NMR chemical shift of tetramethylsilane (TMS) calculated at the same level of theory. The DFT calculated <sup>1</sup>H NMR chemical shifts assisted in assigning the experimental spectra. The analysis of TD-DFT studies was carried out using GaussSum 3.0 software.<sup>19</sup>

**Table S1.** Crystallographic data for tubular[4,8,8,8]arene **1**.

| Tubular[4,8,8,8]arene ( <b>1</b> )                    |                                                                                                 |
|-------------------------------------------------------|-------------------------------------------------------------------------------------------------|
| <b>CCDC Number</b>                                    | 1994725                                                                                         |
| <b>Chemical formula</b>                               | C <sub>104</sub> H <sub>80</sub> N <sub>8</sub> O <sub>8</sub> ·C <sub>2</sub> H <sub>3</sub> N |
| <b>Formula weight</b>                                 | 1610.81                                                                                         |
| <b>Space group</b>                                    | <i>Pnma</i>                                                                                     |
| <b><i>a</i> (Å)</b>                                   | 16.087 (3)                                                                                      |
| <b><i>b</i> (Å)</b>                                   | 25.358 (5)                                                                                      |
| <b><i>c</i> (Å)</b>                                   | 21.354 (4)                                                                                      |
| <b><math>\alpha</math> (deg)</b>                      | 90                                                                                              |
| <b><math>\beta</math> (deg)</b>                       | 90                                                                                              |
| <b><math>\gamma</math> (deg)</b>                      | 90                                                                                              |
| <b><i>V</i> (Å<sup>3</sup>)</b>                       | 8711 (3)                                                                                        |
| <b><i>Z</i></b>                                       | 4                                                                                               |
| <b><math>\mu</math> (mm<sup>-1</sup>)</b>             | 0.623                                                                                           |
| <b>T (K)</b>                                          | 150                                                                                             |
| <b><i>R1</i><sup>a</sup> (<i>wR2</i><sup>b</sup>)</b> | 0.079 (0.253)                                                                                   |
| <b>Reflections</b>                                    | 8540                                                                                            |
| <b>Radiation type</b>                                 | Cu <i>K</i> $\alpha$                                                                            |

<sup>a</sup> $R1 = [\Sigma w(F_o - F_c)^2 / \Sigma w F_o^2]^{1/2}$ ; <sup>b</sup> $wR2 = [\Sigma [w(F_o^2 - F_c^2)^2] / \Sigma w(F_o^2)^2]^{1/2}$ ,  $w = 1 / [\sigma^2(F_o^2) + (aP)^2 + bP]$ , where  $P = [\max(F_o^2, 0) + 2(F_c^2)] / 3$

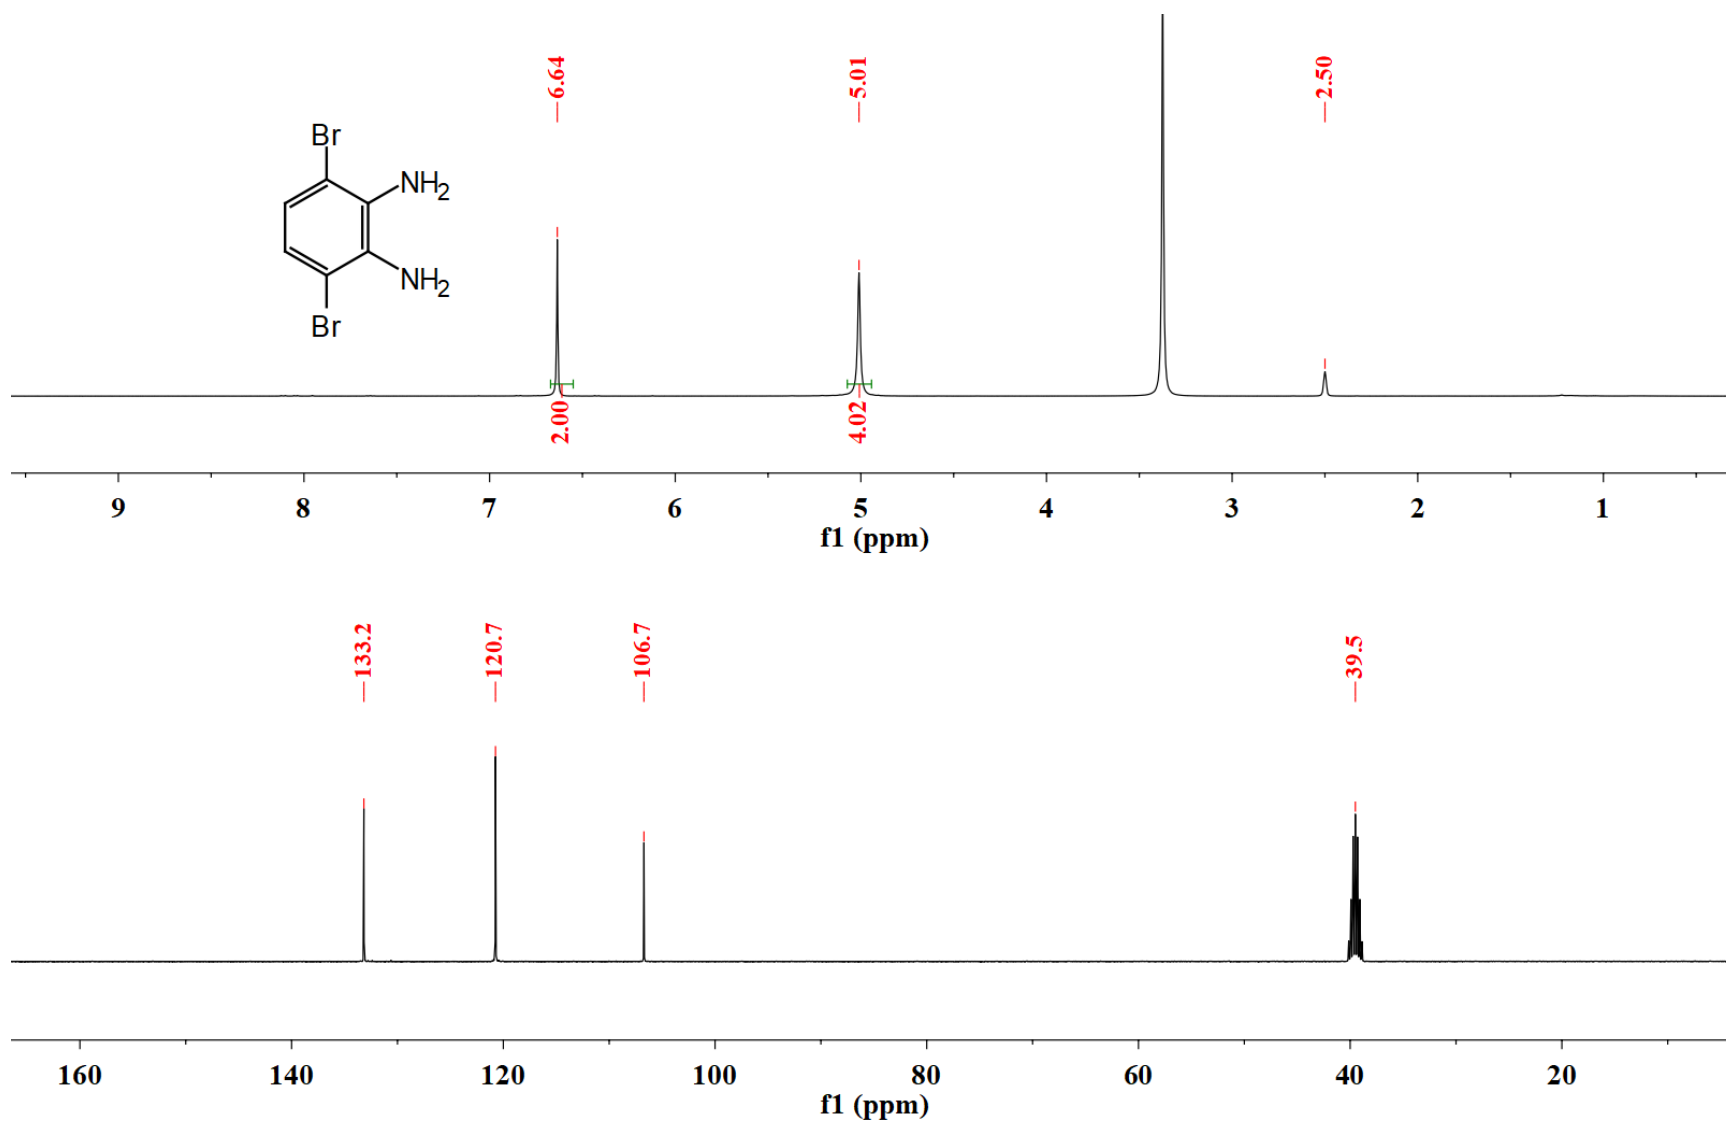

**Figure S1.**  $^1\text{H}$  and  $^{13}\text{C}$  NMR spectra of compound S2. Data collected in  $\text{DMSO-}d_6$  at 20 °C.

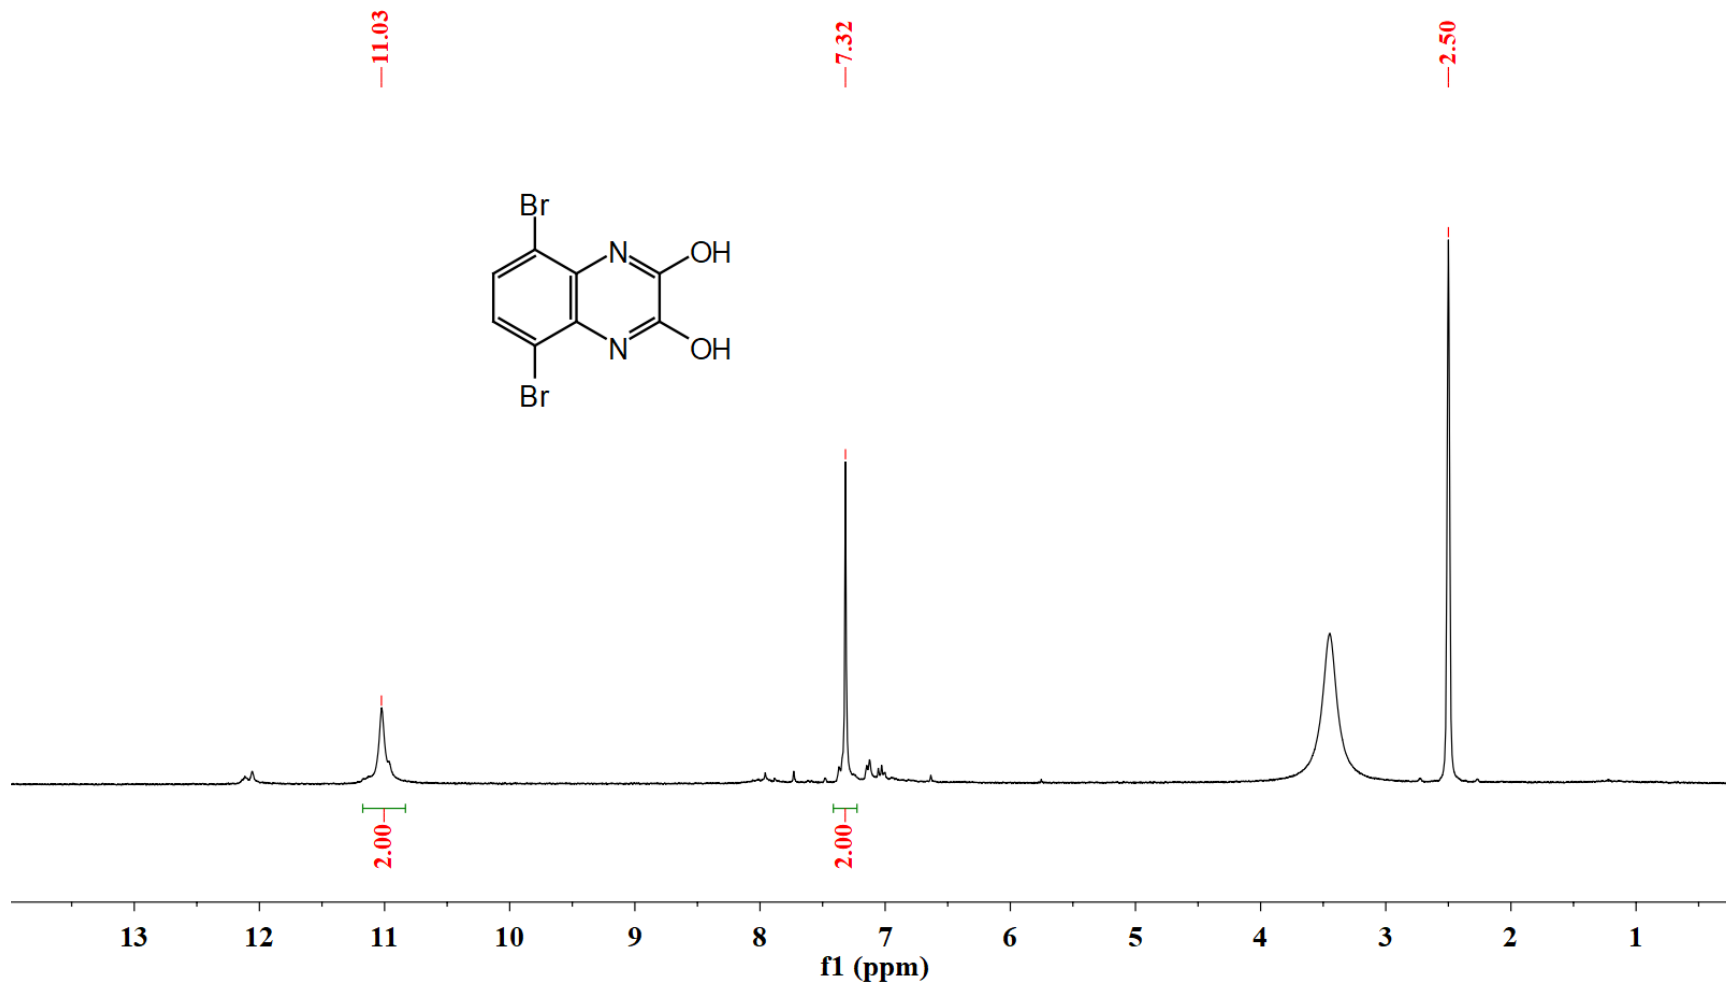

**Figure S2.** <sup>1</sup>H NMR spectrum of compound S3. Data collected in DMSO-*d*<sub>6</sub> at 20 °C.

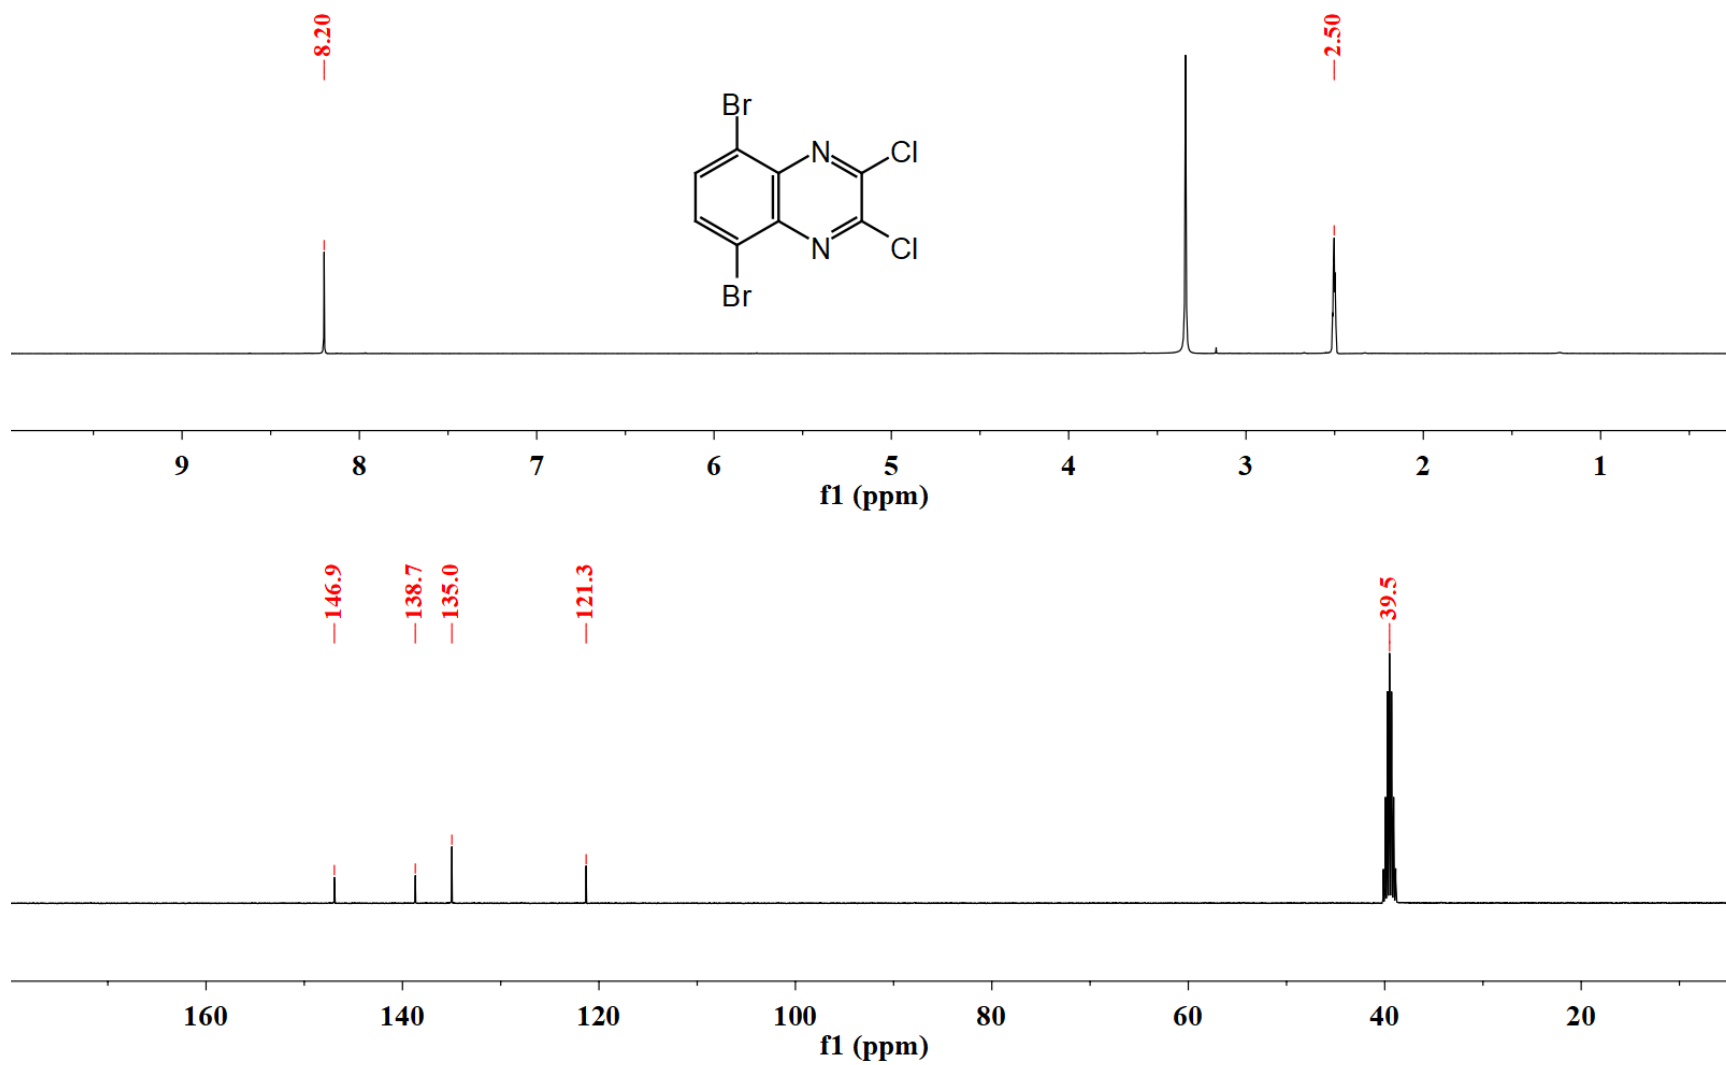

**Figure S3.** <sup>1</sup>H and <sup>13</sup>C NMR spectra of compound 5. Data collected in DMSO-*d*<sub>6</sub> at 20 °C.

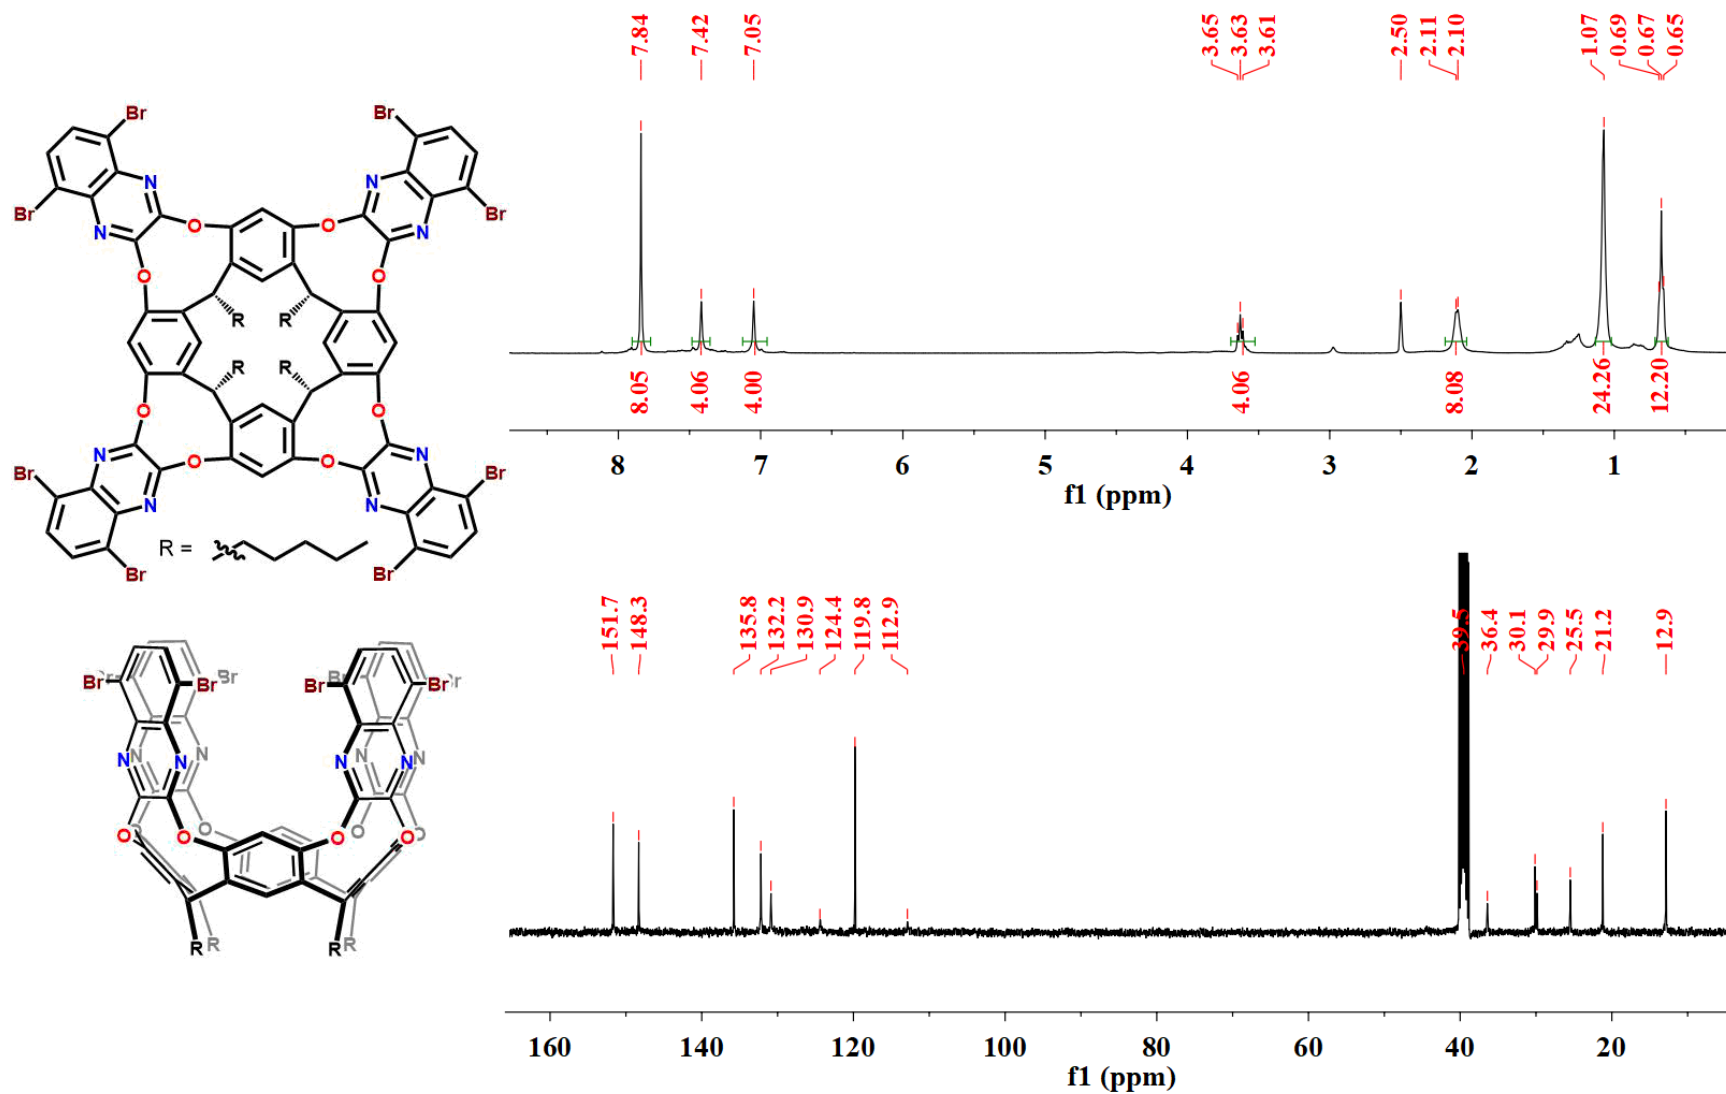

Figure S4.  $^1\text{H}$  and  $^{13}\text{C}$  NMR spectra of compound 3. Data collected in  $\text{DMSO-}d_6$  at  $100^\circ\text{C}$ .

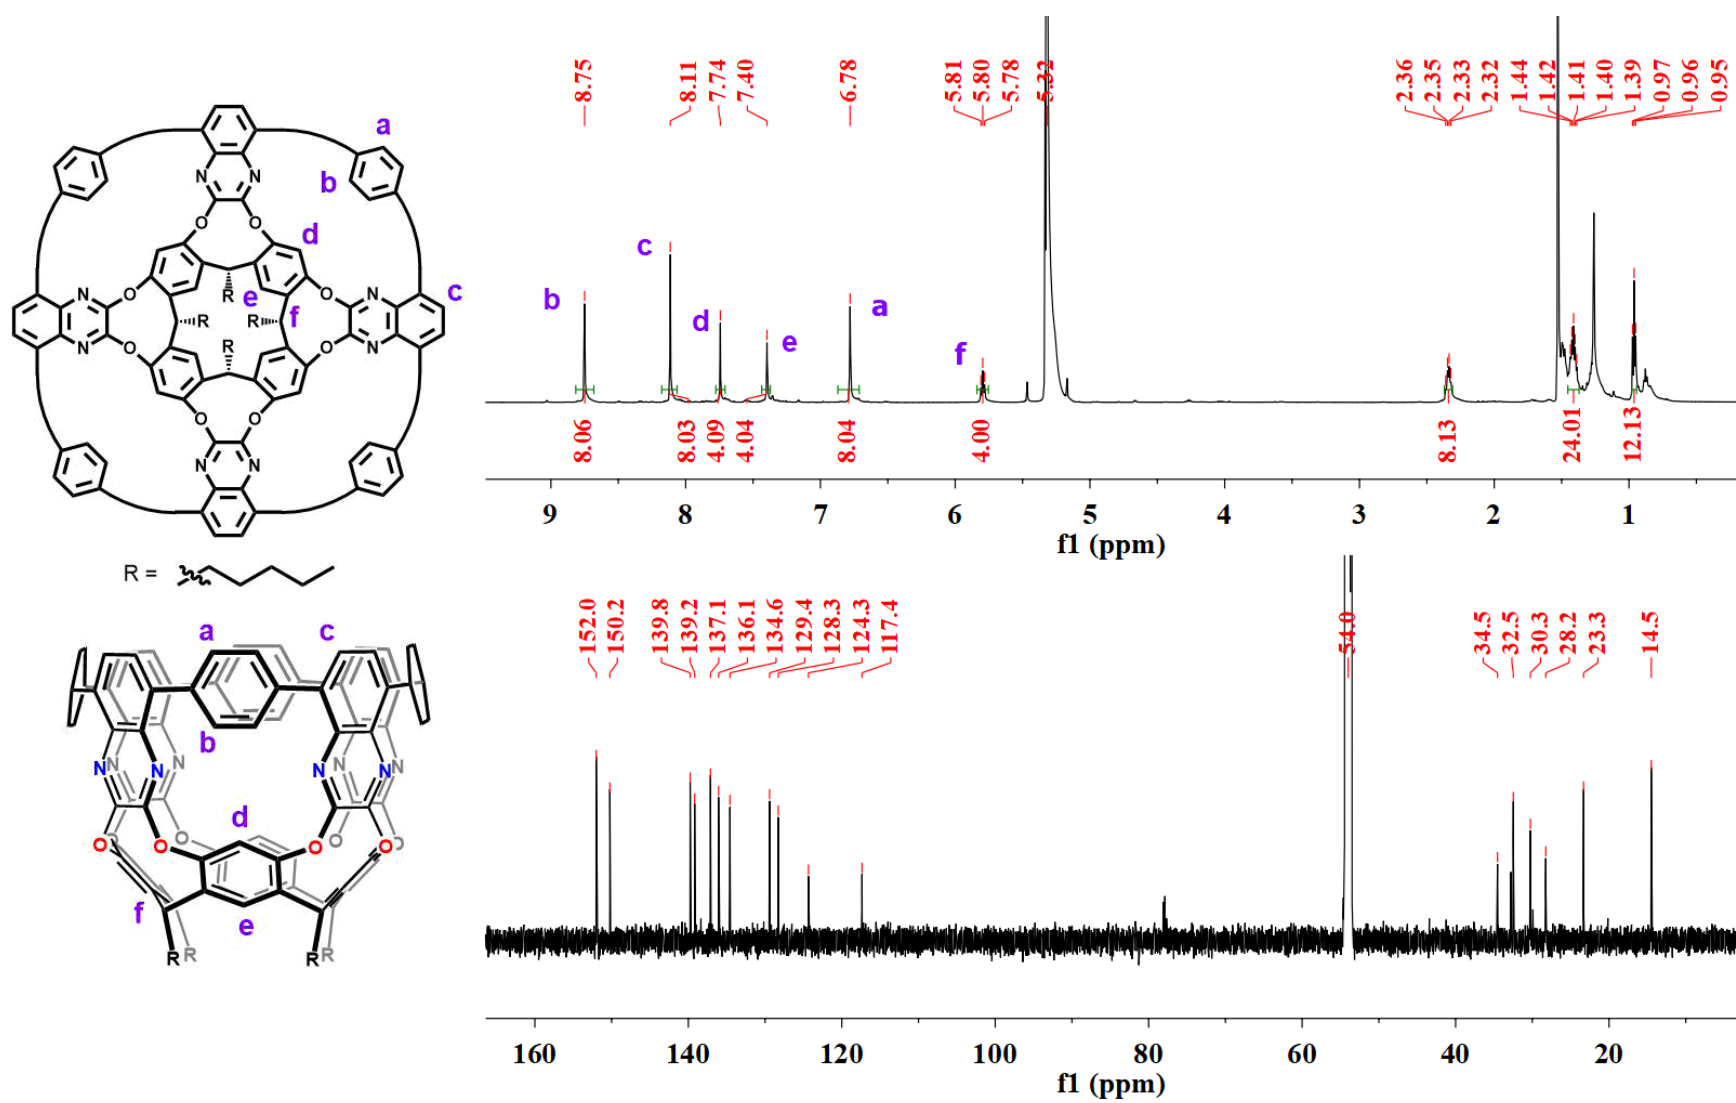

Figure S5. <sup>1</sup>H and <sup>13</sup>C NMR spectra of tubularene 1. Data collected in CD<sub>2</sub>Cl<sub>2</sub> at 20 °C.



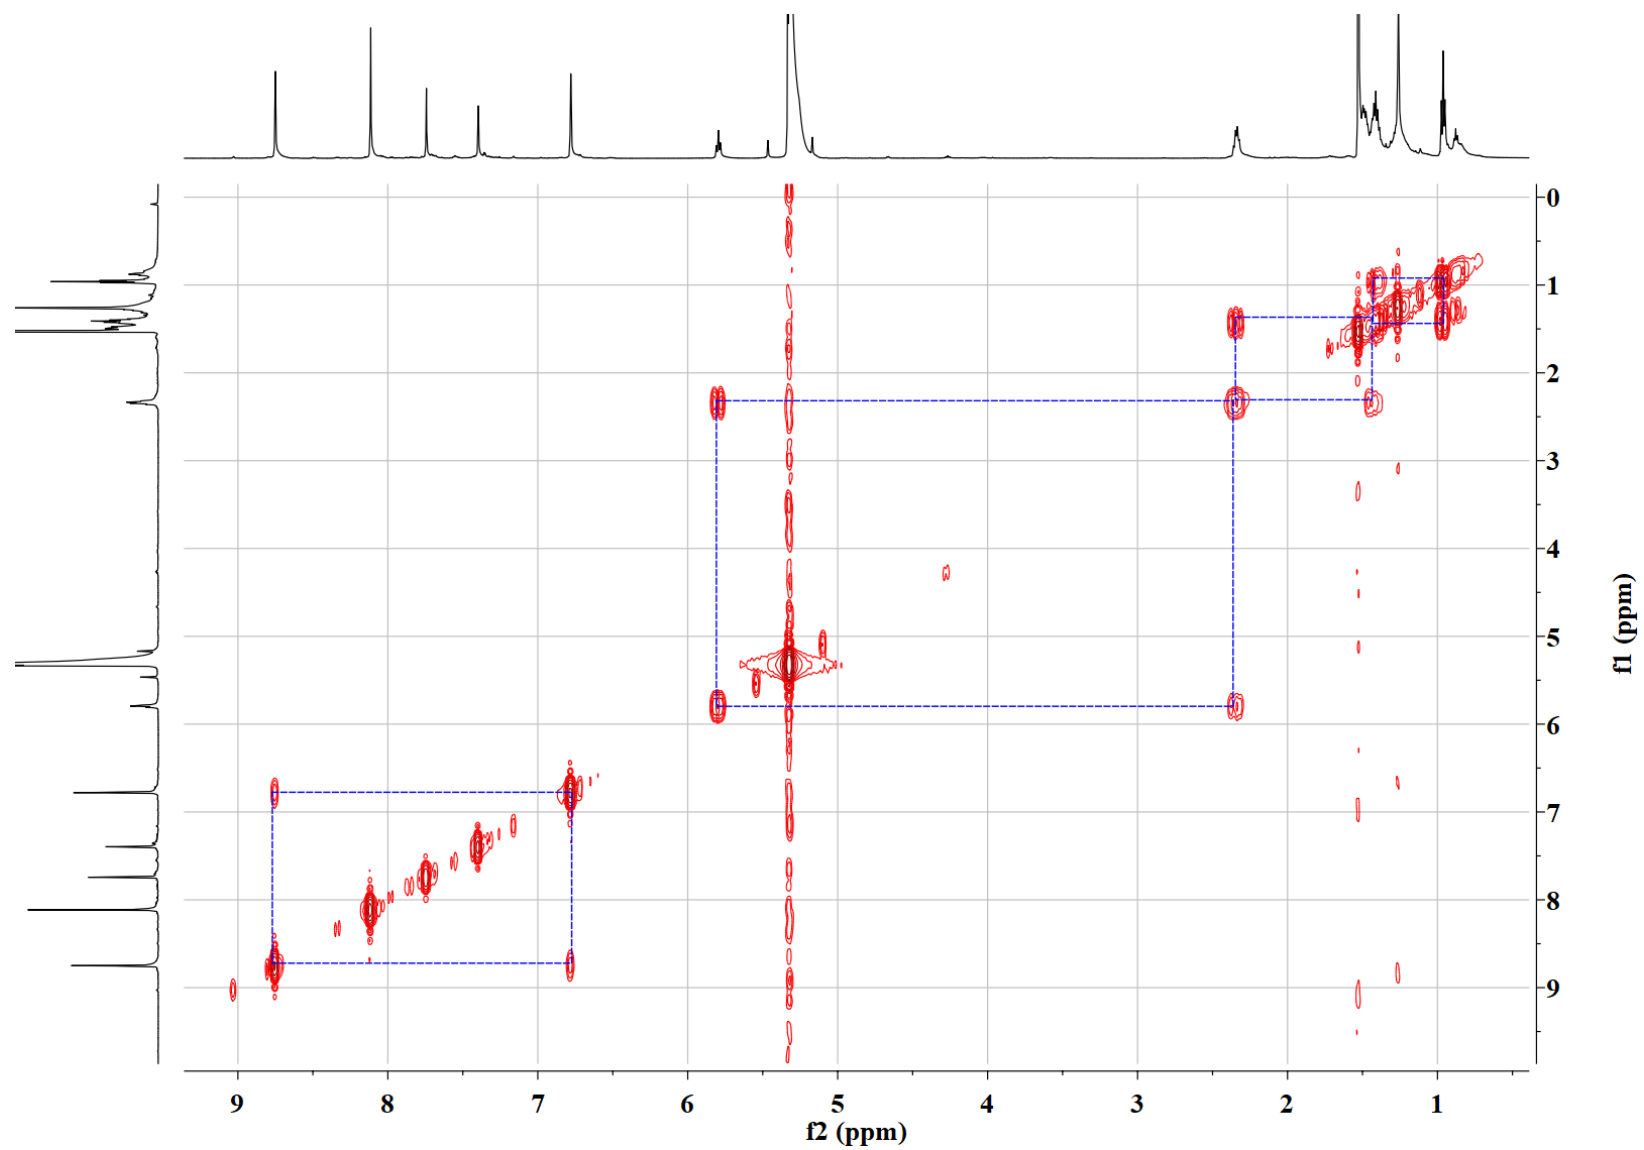

**Figure S6.** COSY NMR spectrum of tubularene **1**. Data collected in CD<sub>2</sub>Cl<sub>2</sub> at 20 °C.

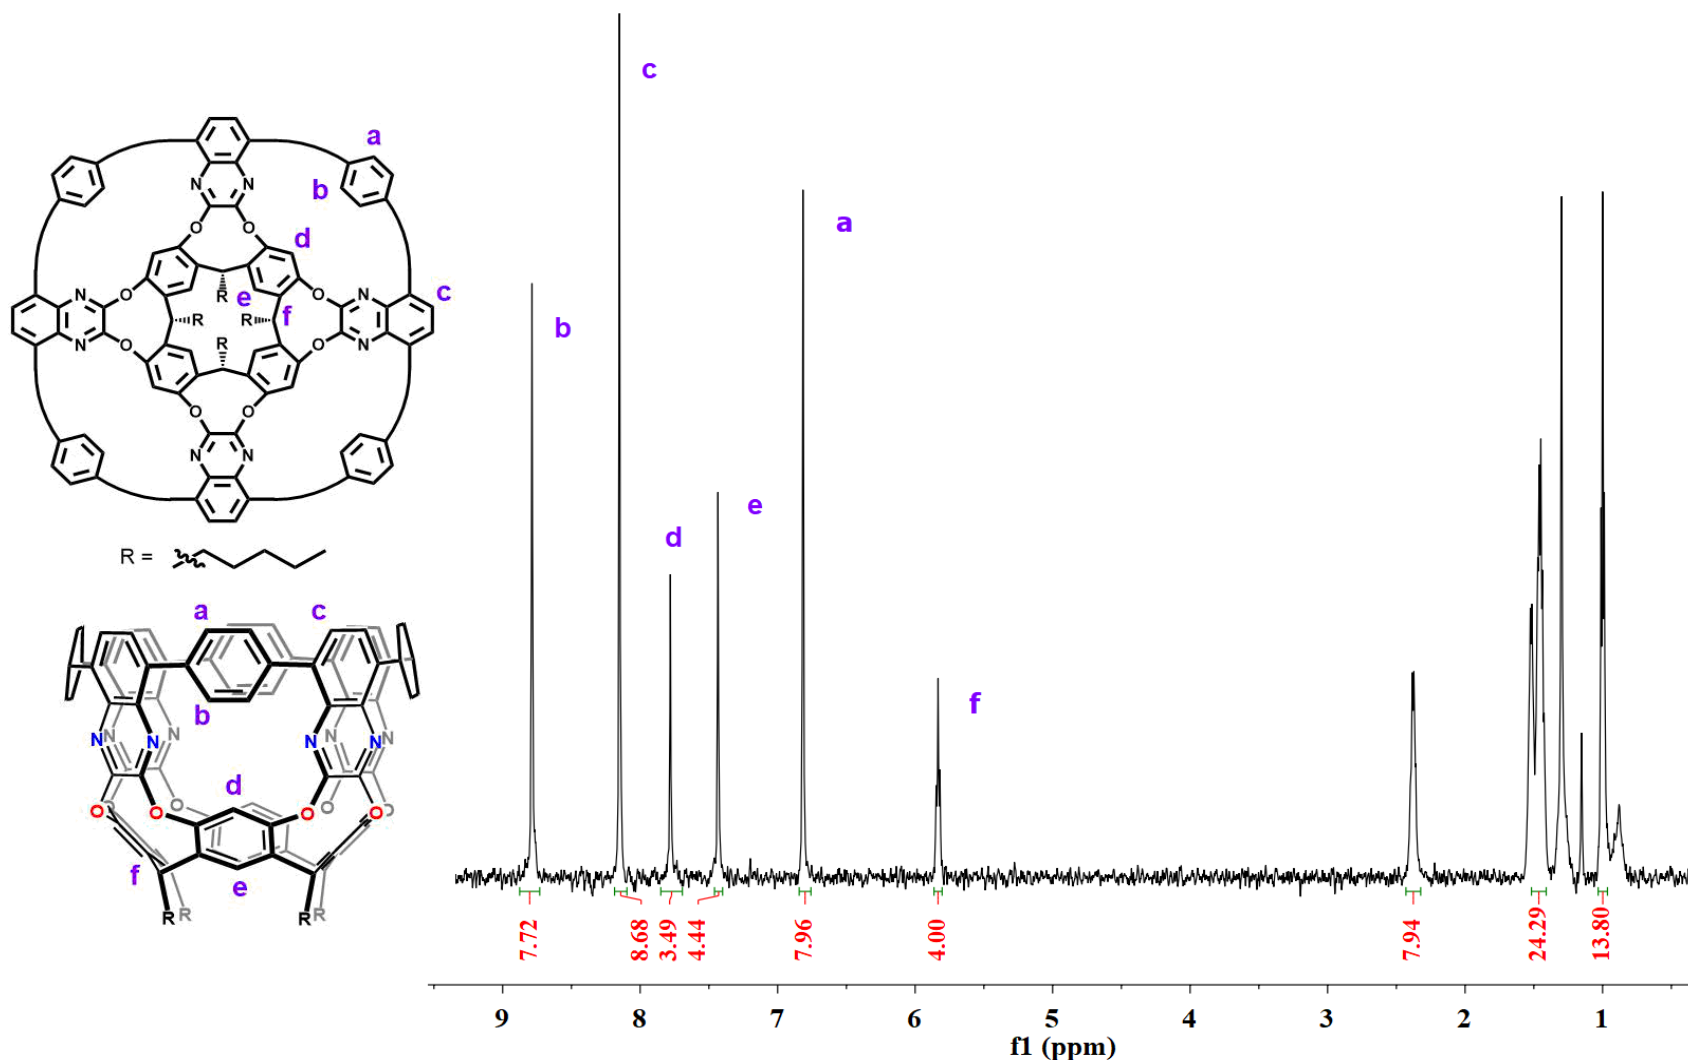

**Figure S7.** DOSY NMR spectrum of tubularene **1**. Shown above is one of the many regular  $^1\text{H}$  NMR spectrum collected during a DOSY experiment to show the slowly-diffusing species. Data collected in  $\text{CD}_2\text{Cl}_2$  at 20 °C.

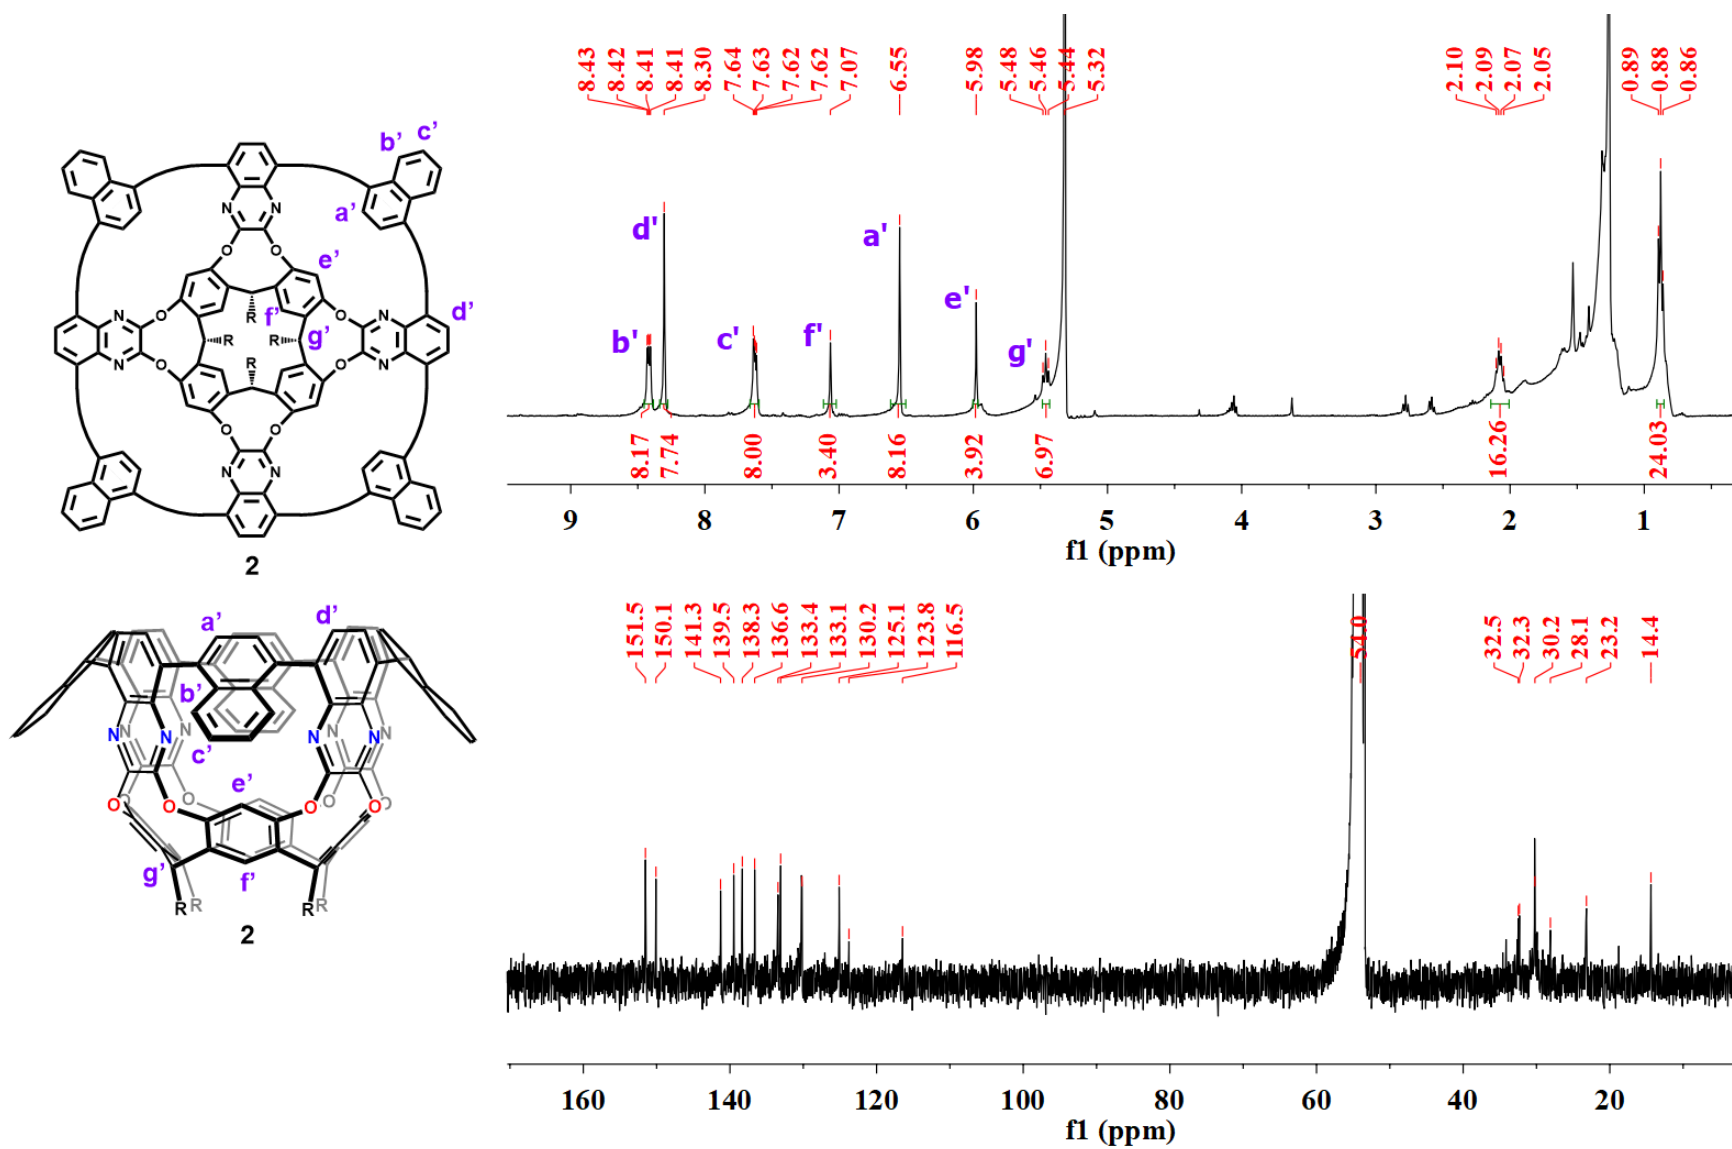

**Figure S8.** <sup>1</sup>H and <sup>13</sup>C NMR spectra of tubularene **2**. Data collected in CD<sub>2</sub>Cl<sub>2</sub> at 20 °C.

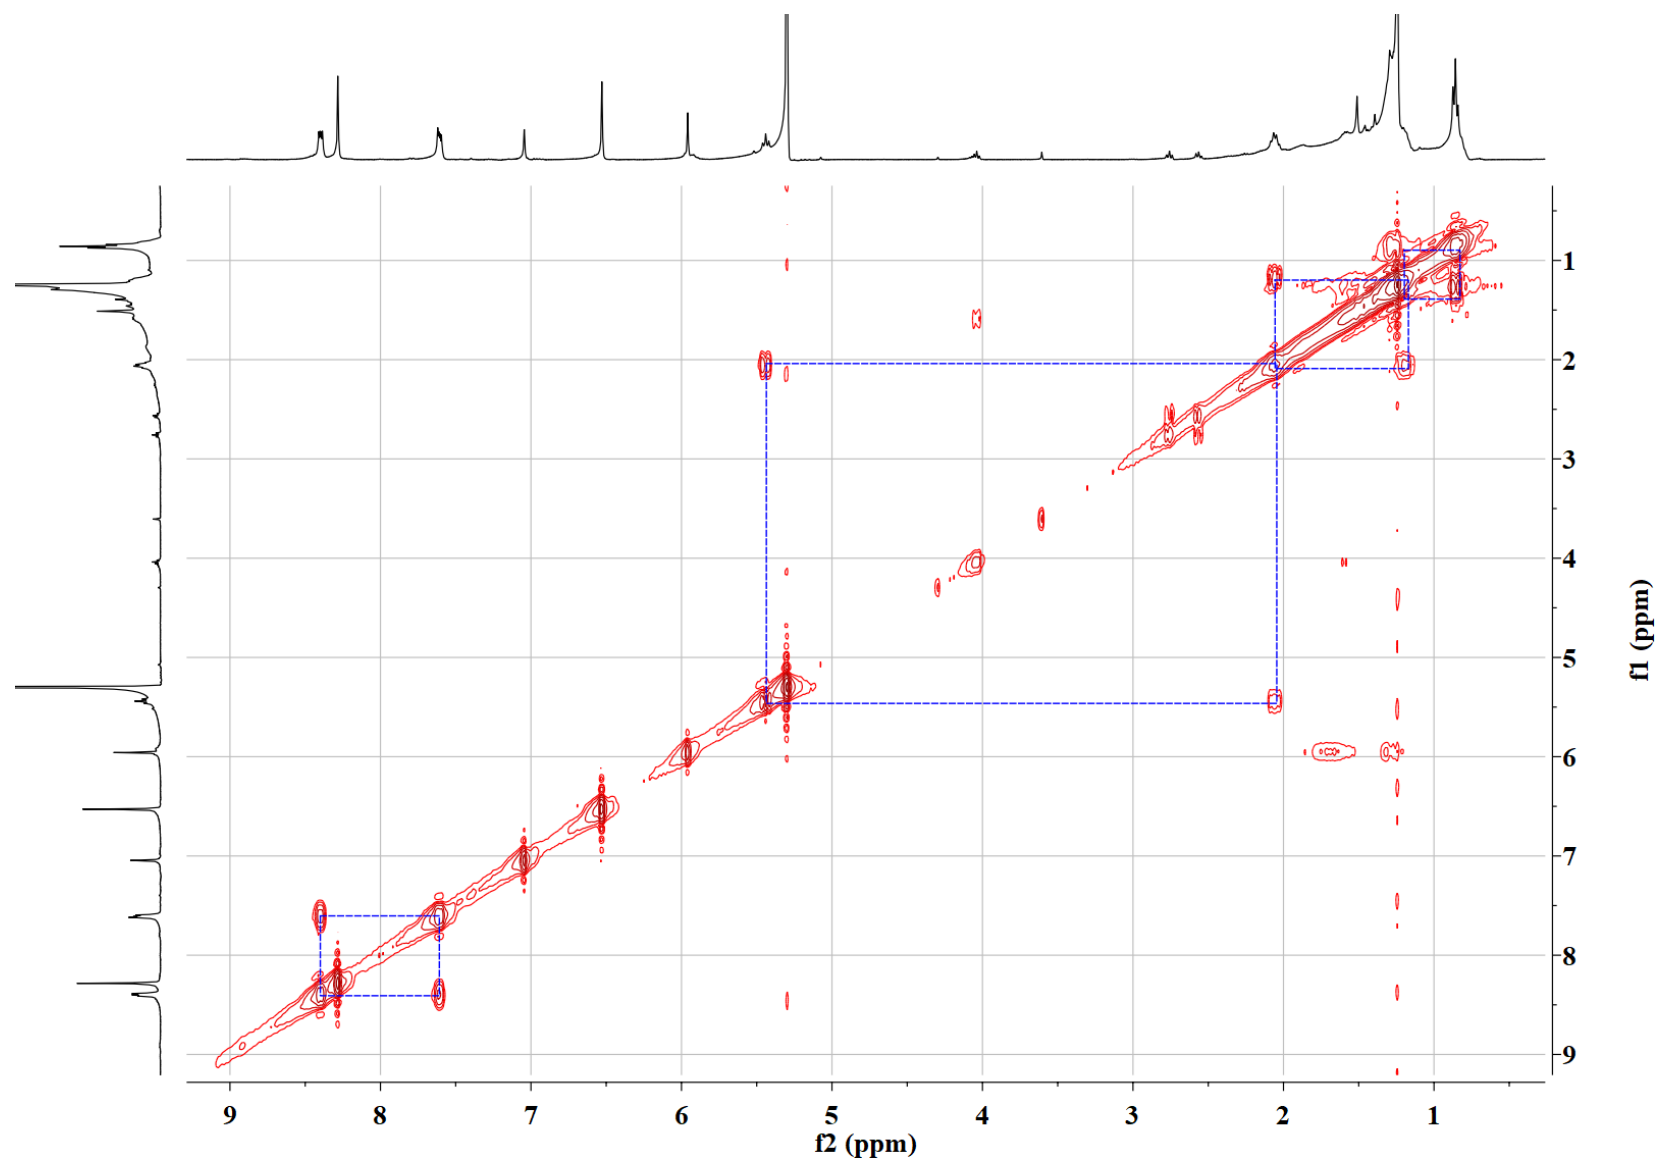

**Figure S9.** COSY NMR spectrum of tubularene **2**. Data collected in CD<sub>2</sub>Cl<sub>2</sub> at 20 °C.

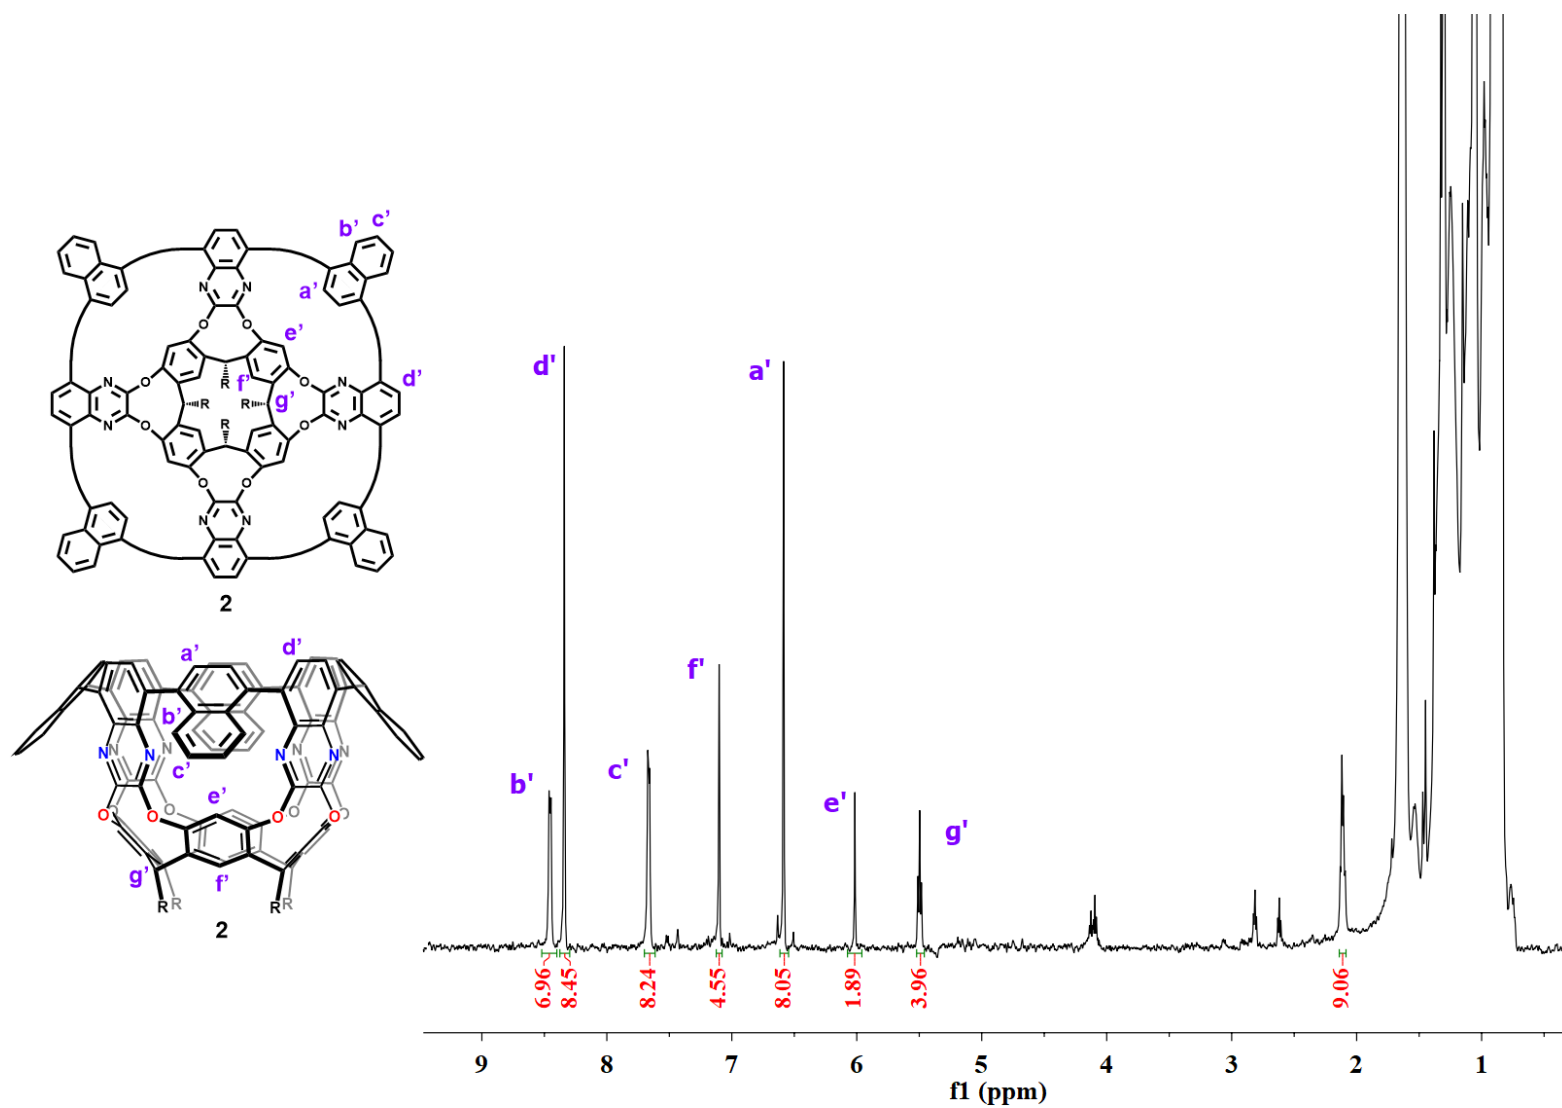

**Figure S10.** DOSY NMR spectrum of tubularene **2**. Shown above is one of the many regular <sup>1</sup>H NMR spectrum collected during a DOSY experiment to show the slowly-diffusing species. Data collected in CD<sub>2</sub>Cl<sub>2</sub> at 20 °C.

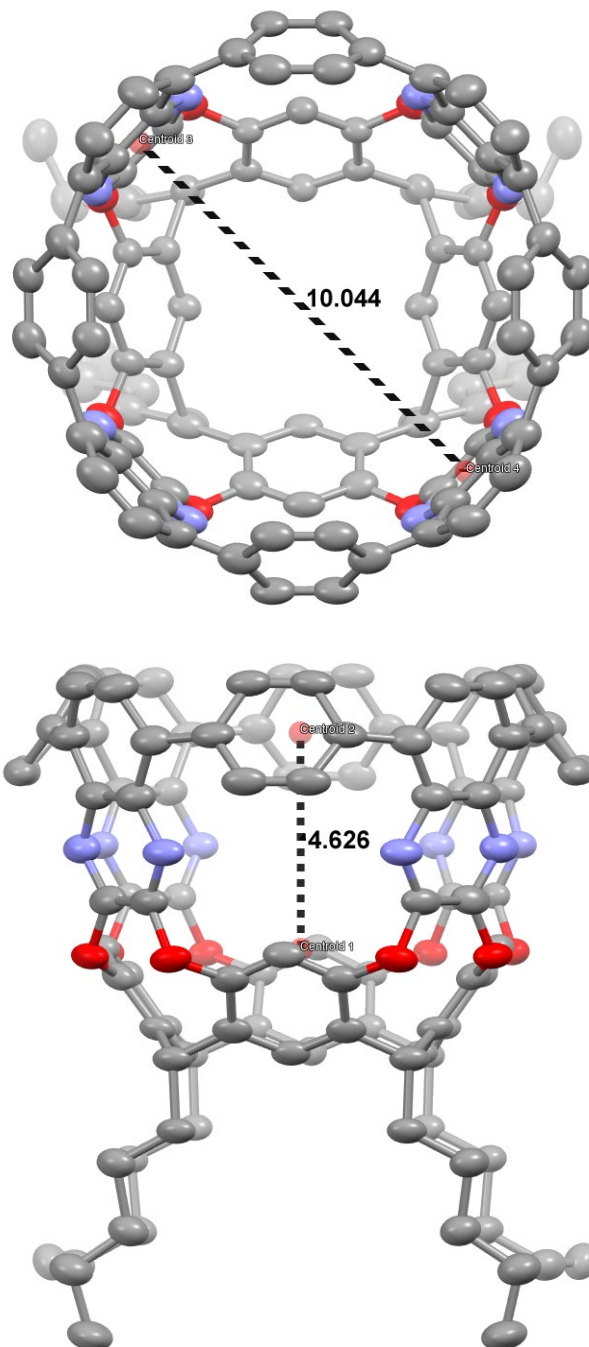

**Figure S11.** Interior cavity measurements of tubularene **1**. Calculated volume  $\approx 360 \text{ \AA}^3$ . *Top*: Diameter (10.044  $\text{\AA}$ ). Defined as the distance from centroid-to-centroid of two opposing pyrazinic rings. *Bottom*: Height (4.626  $\text{\AA}$ ). Defined as the distance between *i*) centroid 1 (resulting from the four top carbon atoms of each of the aromatic rings making up the resorcin[4]arene fragment), and *ii*) centroid 2 (resulting from the *para* carbons in the top eight-member aromatic ring).

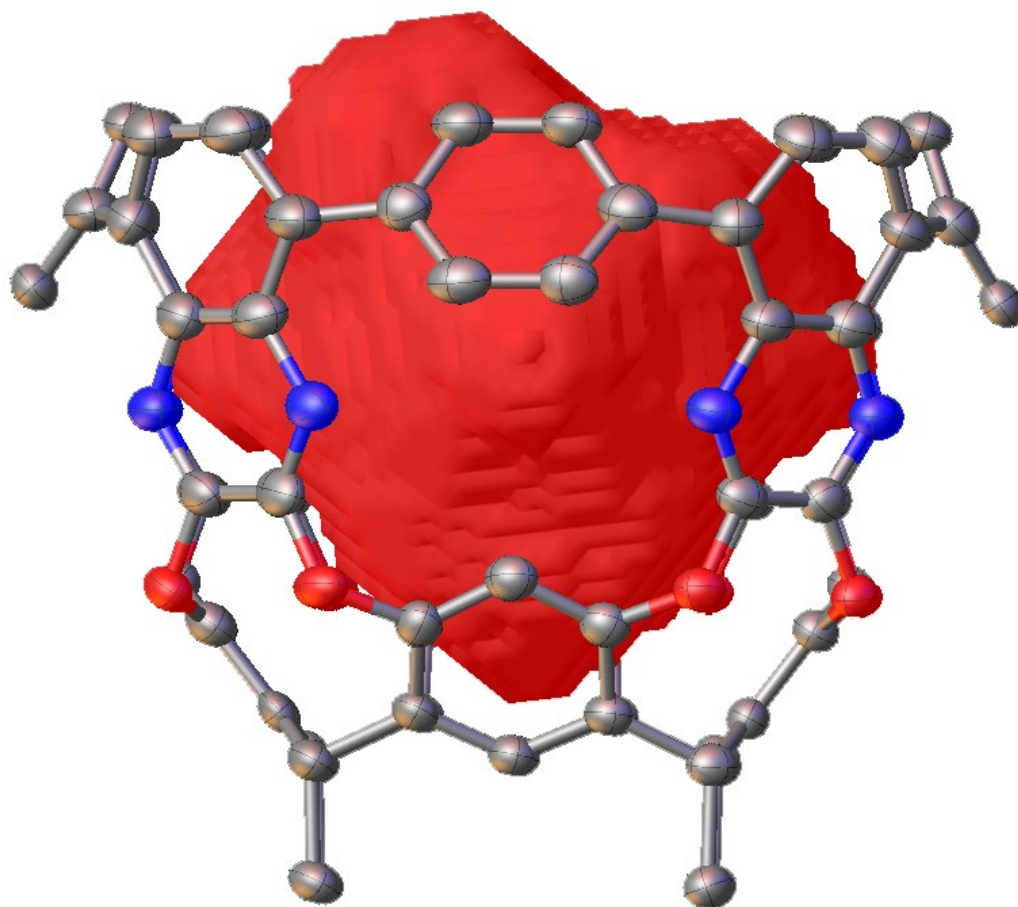

**Figure S12.** Surface (in red) of the solvent accessible volume ( $265.9 \text{ \AA}^3$ ) of tubularene **1** calculated in Olex2.

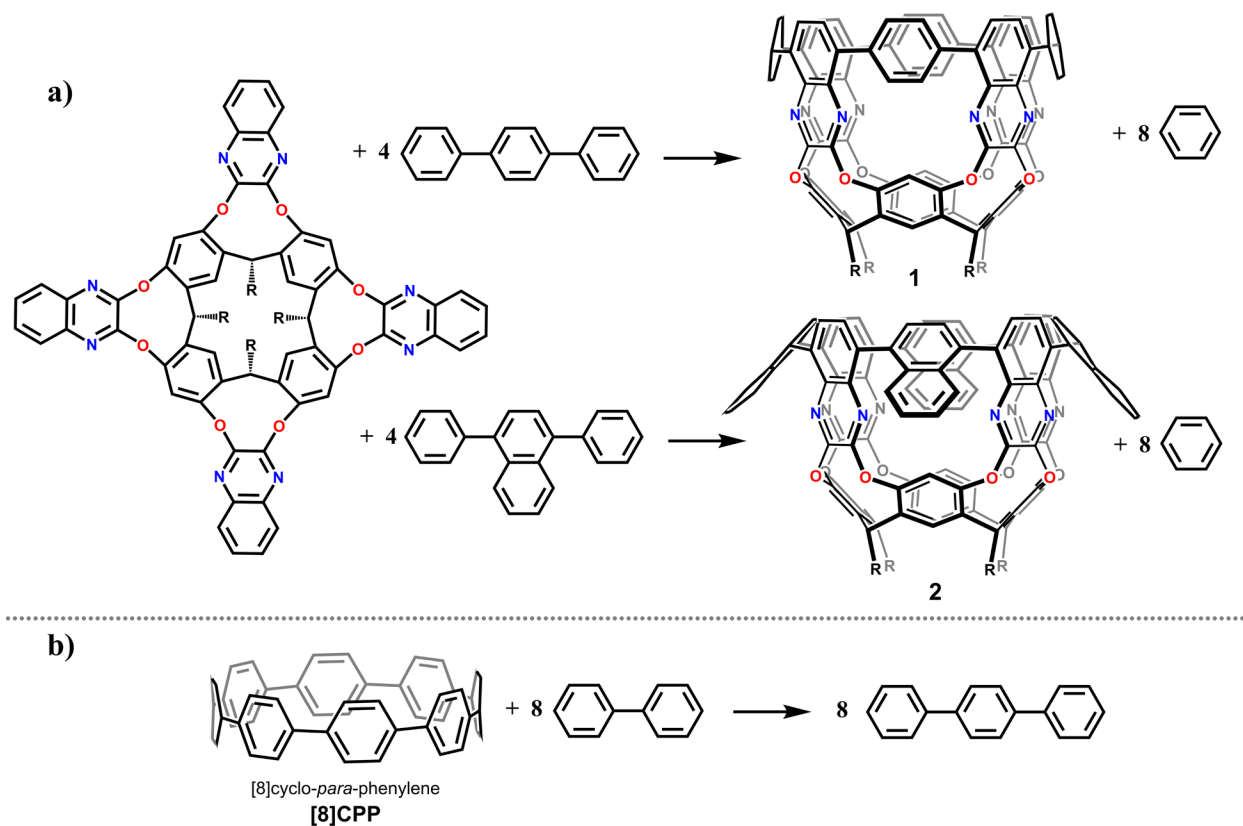

**Figure S13.** Homodesmotic reactions for the calculation of strain energies of a) tubularene **1** and **2** and b) [8]CPP].

**Table S2.** Strain energies ( $\Delta H$ , in kcal/mol) of **1**, **2**, and [8]CPP calculated at DFT/6-31G\* level of theory based on homodesmotic reactions as described in *Figure S13*.

|          | B3LYP | B3LYP-D3BJ | M062X | MN15 | $\omega$ B97XD |
|----------|-------|------------|-------|------|----------------|
| <b>1</b> | 92.4  | 86.6       | 89.2  | 86.4 | 90.5           |
| <b>2</b> | 87.4  | 76.7       | 81.6  | 78.1 | 81.4           |
| [8]CPP   | 71.9  | 69.3       | 72.7  | 70.9 | 72.4           |



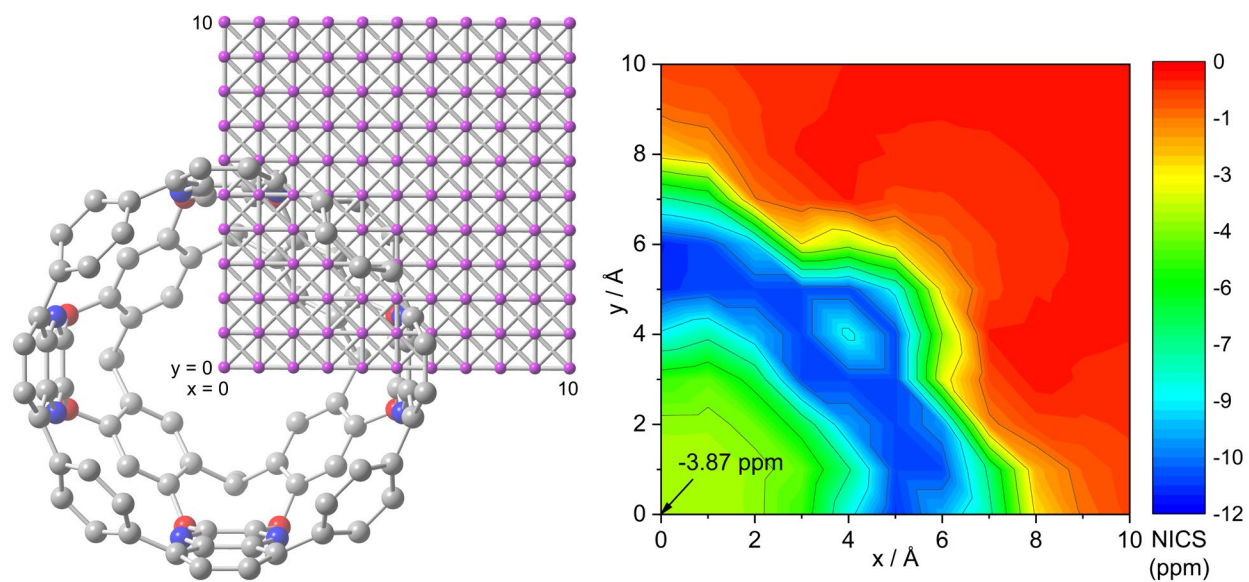

**Figure S14.** Nucleus-independent chemical shifts (NICS) in **1**. The origin of the grid shown in the left hand side starts at the geometric center of the [8]CPP-like nanoring in **1**. At the origin, NICS =  $-3.87$  ppm. NICS were calculated at the MN15/6-31G\*+PCM(CH<sub>2</sub>Cl<sub>2</sub>) level of theory.

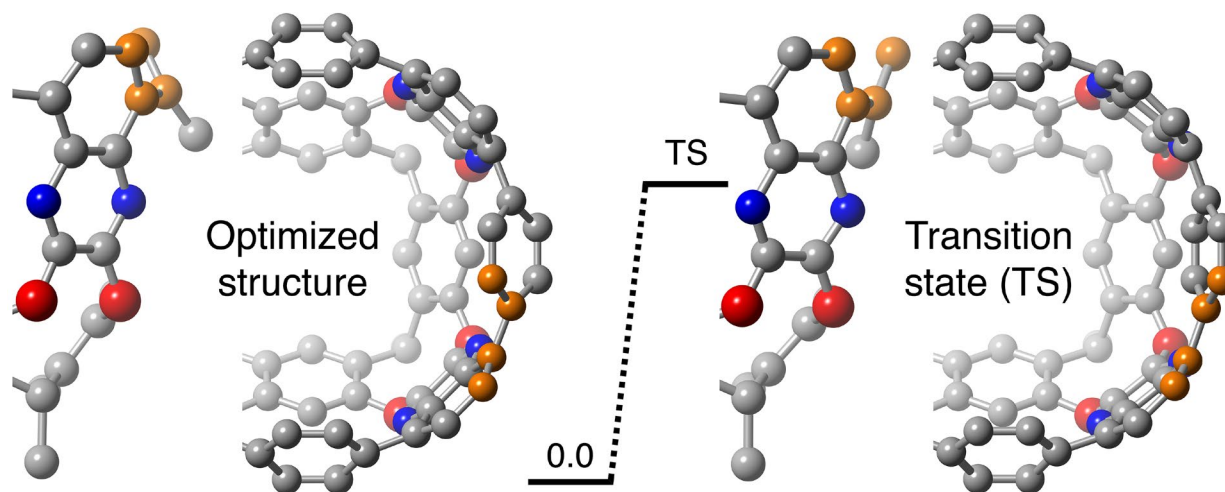

**Figure S15.** Dihedral angle ( $\theta$ ) change between the highlighted aromatic rings of the (left) DFT optimized structure of tubularene **1** and (right) transition state (TS) during ring flipping ( $\theta$  was measured between the highlighted atoms). The hydrogens and the rest of the molecule's atoms are omitted for clarity.

**Table S3.** DFT calculated thermochemistry of ring flipping in **1**. Provided below are the relative energy ( $\Delta E + \text{ZPE}$ ), enthalpy ( $\Delta H$ ), and Gibbs free energy ( $\Delta G$ ) for the rotation of one of the phenyl groups (as described in *Figure S15*) using DFT/6-31G\*+PCM(CH<sub>2</sub>Cl<sub>2</sub>), in kcal/mol.

|                         | B3LYP-D3BJ |      | M062X    |      | MN15     |      | $\omega$ B97XD |      |
|-------------------------|------------|------|----------|------|----------|------|----------------|------|
|                         | <b>1</b>   | TS   | <b>1</b> | TS   | <b>1</b> | TS   | <b>1</b>       | TS   |
| $\Delta E + \text{ZPE}$ | 0.0        | 26.9 | 0.0      | 29.6 | 0.0      | 28.6 | 0.0            | 30.0 |
| $\Delta H$              | 0.0        | 26.4 | 0.0      | 29.2 | 0.0      | 28.2 | 0.0            | 29.5 |
| $\Delta G$              | 0.0        | 27.6 | 0.0      | 30.1 | 0.0      | 29.2 | 0.0            | 30.9 |
| $\theta$ ( $^\circ$ )   | -38.2      | 13.6 | -39.2    | 12.8 | -38.6    | 12.4 | -41.1          | 13.5 |

**Table S4.** DFT calculated thermochemistry of ring flipping in **[8]CPP**. Provided below are the relative energy ( $\Delta E+ZPE$ ), enthalpy ( $\Delta H$ ), and Gibbs free energy ( $\Delta G$ ) for the rotation of one of the phenyl groups using DFT/6-31G\*+PCM(CH<sub>2</sub>Cl<sub>2</sub>), in kcal/mol. Dihedral angle ( $\theta$ ) is determined by the highlighted atoms.

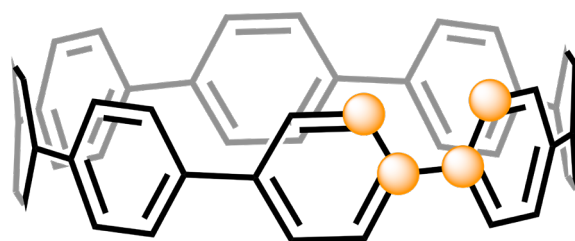

[8]cyclo-*para*-phenylene  
**[8]CPP**

|                | B3LYP-D3BJ    |      | M062X         |      | MN15          |      | $\omega$ B97XD |      |
|----------------|---------------|------|---------------|------|---------------|------|----------------|------|
|                | <b>[8]CPP</b> | TS   | <b>[8]CPP</b> | TS   | <b>[8]CPP</b> | TS   | <b>[8]CPP</b>  | TS   |
| $\Delta E+ZPE$ | 0.0           | 2.7  | 0.0           | 3.2  | 0.0           | 2.9  | 0.0            | 3.6  |
| $\Delta H$     | 0.0           | 2.2  | 0.0           | 2.7  | 0.0           | 2.4  | 0.0            | 3.2  |
| $\Delta G$     | 0.0           | 3.3  | 0.0           | 3.7  | 0.0           | 3.5  | 0.0            | 4.2  |
| $\theta$ (°)   | 30.0          | -0.3 | 31.3          | -0.6 | 30.0          | -0.7 | 33.8           | -0.6 |

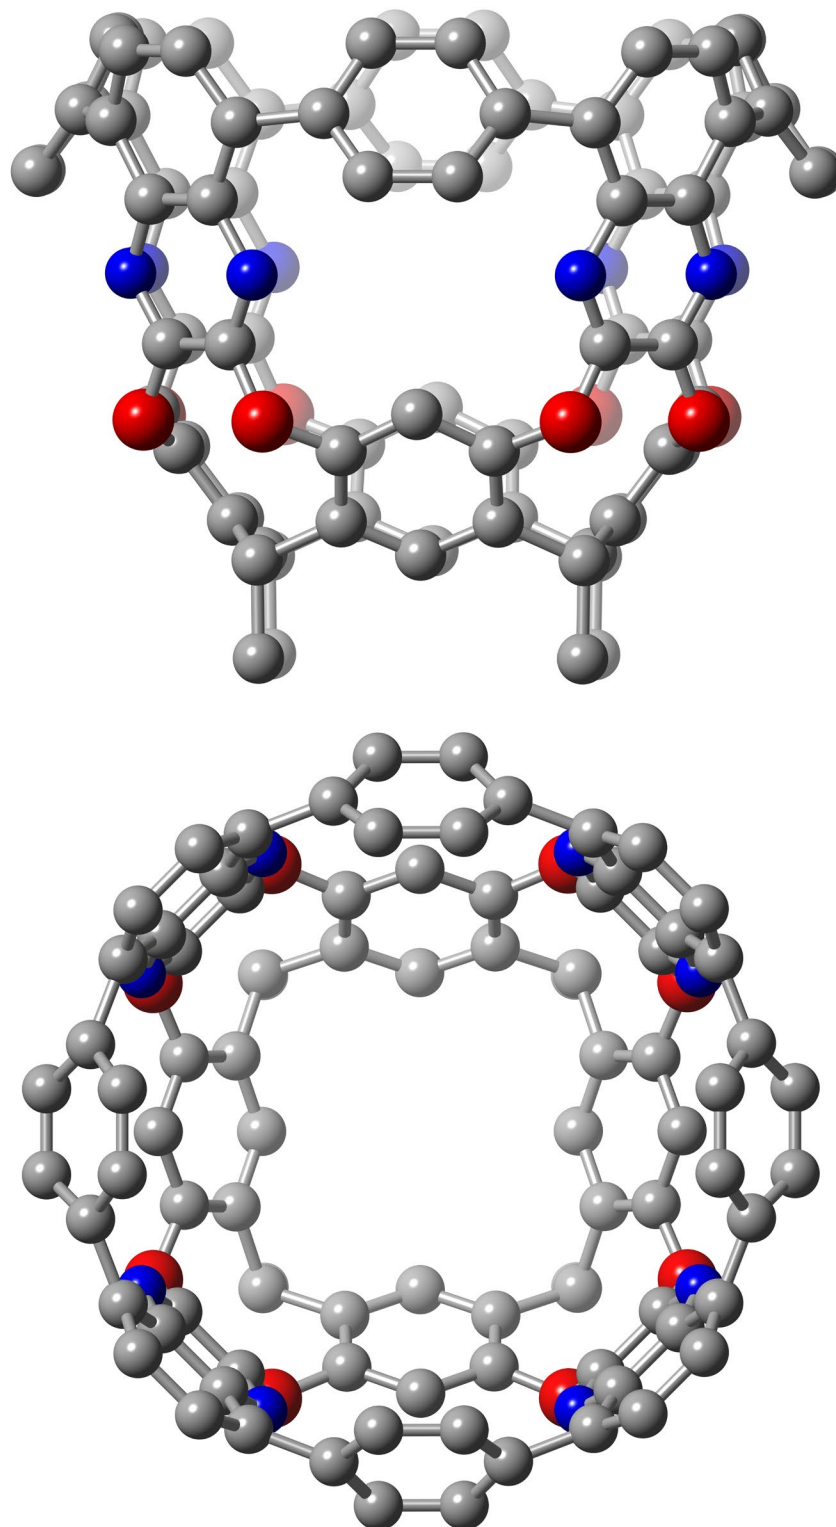

**Figure S16.** DFT optimized structure of tubularene **1** at the MN15/6-31G\*+PCM(CH<sub>2</sub>Cl<sub>2</sub>) level of theory.

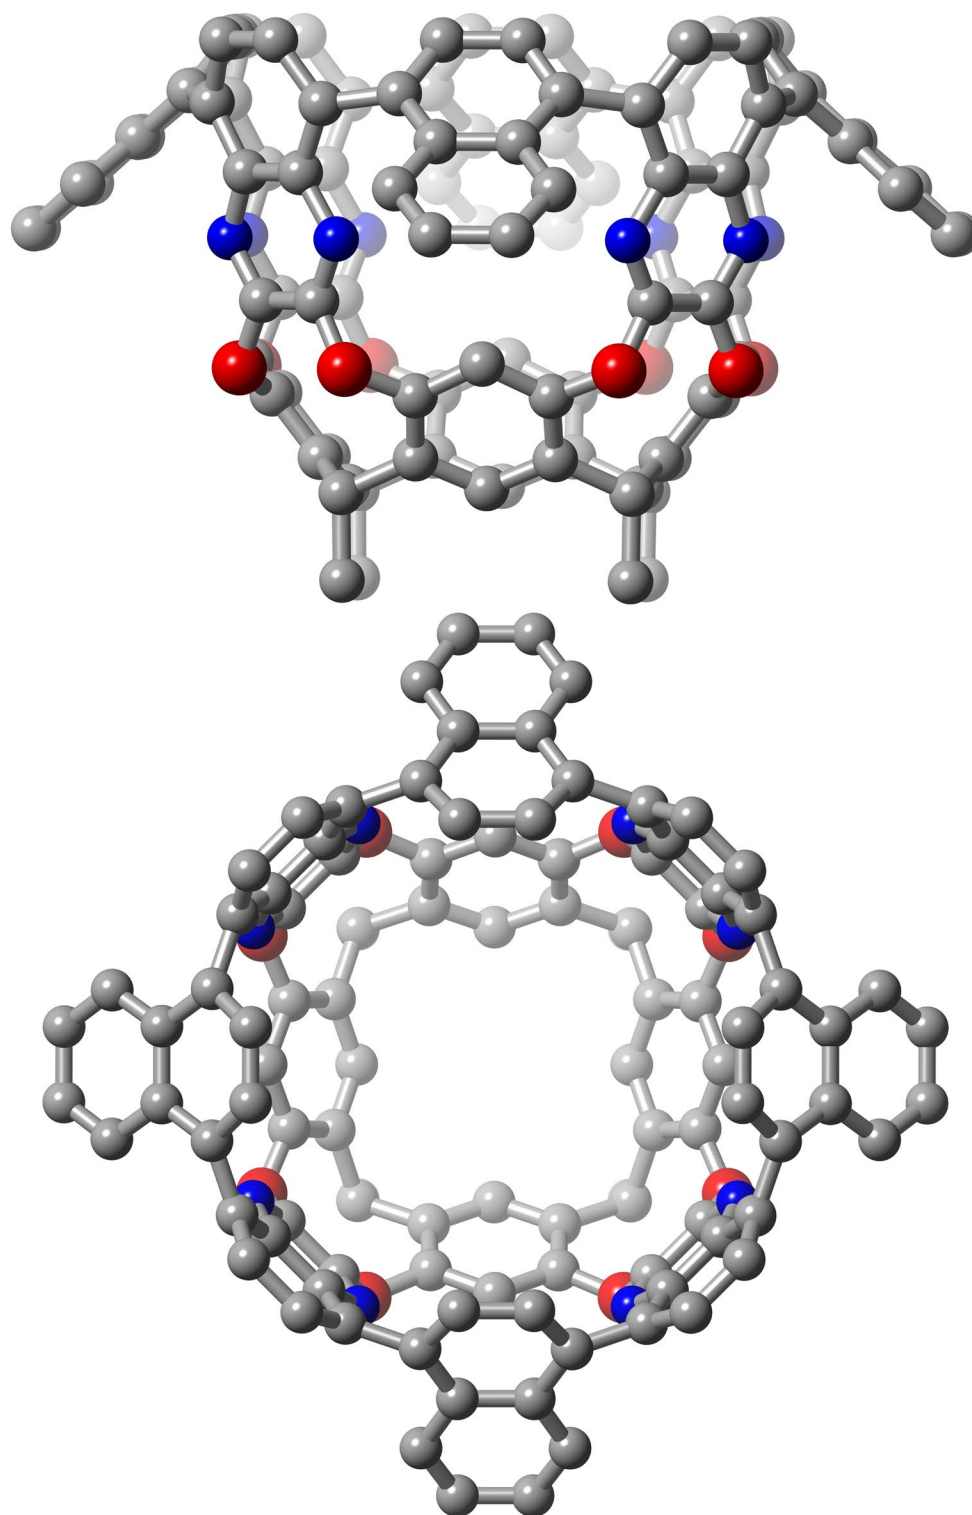

**Figure S17.** DFT optimized structure of tubularene **2** at the MN15/6-31G\*+PCM(CH<sub>2</sub>Cl<sub>2</sub>) level of theory.

**Table S5.** Calculated absorption energies ( $\lambda$ , nm), oscillator strengths ( $f$ ), and main contributions with its percentages at time-dependent (TD) DFT/6-31G\*+PCM(CH<sub>2</sub>Cl<sub>2</sub>) level of theory. Except for the HOMO-to-LUMO transition, only major and intense transitions are provided. H and L stands for HOMO and LUMO, respectively.

|                                 | <b>1</b>       |       |                                                                 | <b>2</b>       |       |                                                                 |
|---------------------------------|----------------|-------|-----------------------------------------------------------------|----------------|-------|-----------------------------------------------------------------|
|                                 | $\lambda$ (nm) | $f$   | Major contributes                                               | $\lambda$ (nm) | $f$   | Major contributes                                               |
| <b>B3LYP-D3BJ</b>               | 507.9          | 0.000 | H→L (94%)                                                       | 504.4          | 0.000 | H→L (88%)                                                       |
|                                 | 451.3          | 0.296 | H→L+1 (90%)                                                     | 466.7          | 0.337 | H-1→L (22%)<br>H→L+1 (67%)                                      |
|                                 | 451.2          | 0.296 | H→L+2 (90%)                                                     | 466.6          | 0.336 | H-2→L (22%)<br>H→L+2 (67%)                                      |
|                                 | 414.7          | 0.139 | H-1→L (91%)                                                     |                |       |                                                                 |
|                                 | 414.6          | 0.139 | H-2→L (91%)                                                     |                |       |                                                                 |
| <b>M062X</b>                    | 381.2          | 0.000 | H→L (68%)                                                       | 380.3          | 0.000 | H→L (62%)<br>H-2→L+2 (14%)<br>H-1→L+1 (15%)                     |
|                                 | 348.8          | 0.636 | H-1→L (33%)<br>H→L+1 (47%)                                      | 355.5          | 0.718 | H-1→L (38%)<br>H→L+1 (46%)                                      |
|                                 | 348.7          | 0.636 | H-2→L (33%)<br>H→L+2 (47%)                                      | 355.4          | 0.719 | H-2→L (38%)<br>H→L+2 (46%)                                      |
|                                 | 284.5          | 0.287 | H-16→L+1 (11%)<br>H-15→L+2 (11%)<br>H-14→L (18%)<br>H→L+8 (10%) | 282.1          | 0.144 | H-20→L+2 (10%)<br>H-19→L+1 (10%)<br>H-18→L (13%)<br>H→L+8 (12%) |
|                                 |                |       |                                                                 |                |       |                                                                 |
| <b>MN15</b>                     | 417.4          | 0.000 | H→L (74%)                                                       | 416.8          | 0.000 | H→L (68%)<br>H-2→L+2 (13%)<br>H-1→L+1 (13%)                     |
|                                 | 379.3          | 0.540 | H-2→L (28%)<br>H→L+1 (10%)<br>H→L+2 (48%)                       | 388.4          | 0.593 | H-1→L (38%)<br>H→L+1 (50%)                                      |
|                                 |                |       |                                                                 | 388.2          | 0.593 | H-2→L (38%)<br>H→L+2 (50%)                                      |
|                                 | 379.2          | 0.540 | H-1→L (28%)<br>H→L+1 (48%)<br>H→L+2 (10%)                       | 300.9          | 0.282 | H-2→L+3 (15%)<br>H-2→L+4 (15%)<br>H→L+5 (23%)                   |
|                                 | 296.8          | 0.184 | H-14→L (20%)<br>H→L+8 (17%)                                     | 300.9          | 0.280 | H-1→L+3 (15%)<br>H-1→L+4 (15%)<br>H→L+6 (23%)                   |
| <b><math>\omega</math>B97XD</b> | 366.5          | 0.000 | H→L (54%)                                                       | 364.2          | 0.000 | H→L (49%)<br>H-1→L+1 (15%)<br>H-2→L+2 (15%)                     |
|                                 | 340.8          | 0.591 | H-2→L+3 (12%)<br>H-1→L (32%)<br>H→L+1 (43%)                     | 343.1          | 0.747 | H-1→LUMO (29%)<br>H→L+1 (40%)                                   |
|                                 | 340.7          | 0.590 | H-2→L (32%)<br>H-1→L+3 (12%)<br>H→L+2 (43%)                     | 343.0          | 0.747 | H-2→L (29%)<br>H→L+2 (40%)                                      |
|                                 | 285.5          | 0.363 | H-14→L (18%)                                                    | 287.2          | 0.214 | H-17→L+3 (12%)                                                  |
|                                 | 266.5          | 0.174 | H-2→L+3 (18%)<br>H-1→L (19%)<br>H→L+11 (11%)                    | 279.9          | 0.318 | H-1→L+4 (11%)                                                   |
|                                 | 266.4          | 0.174 | H-2→L (20%)<br>H-1→L+3 (18%)<br>H→L+12 (11%)                    | 279.8          | 0.317 | H-2→L+4 (11%)                                                   |
|                                 | 260.7          | 0.154 | H-2→L+1 (27%)<br>H-1→L+2 (27%)                                  |                |       |                                                                 |
|                                 |                |       |                                                                 |                |       |                                                                 |

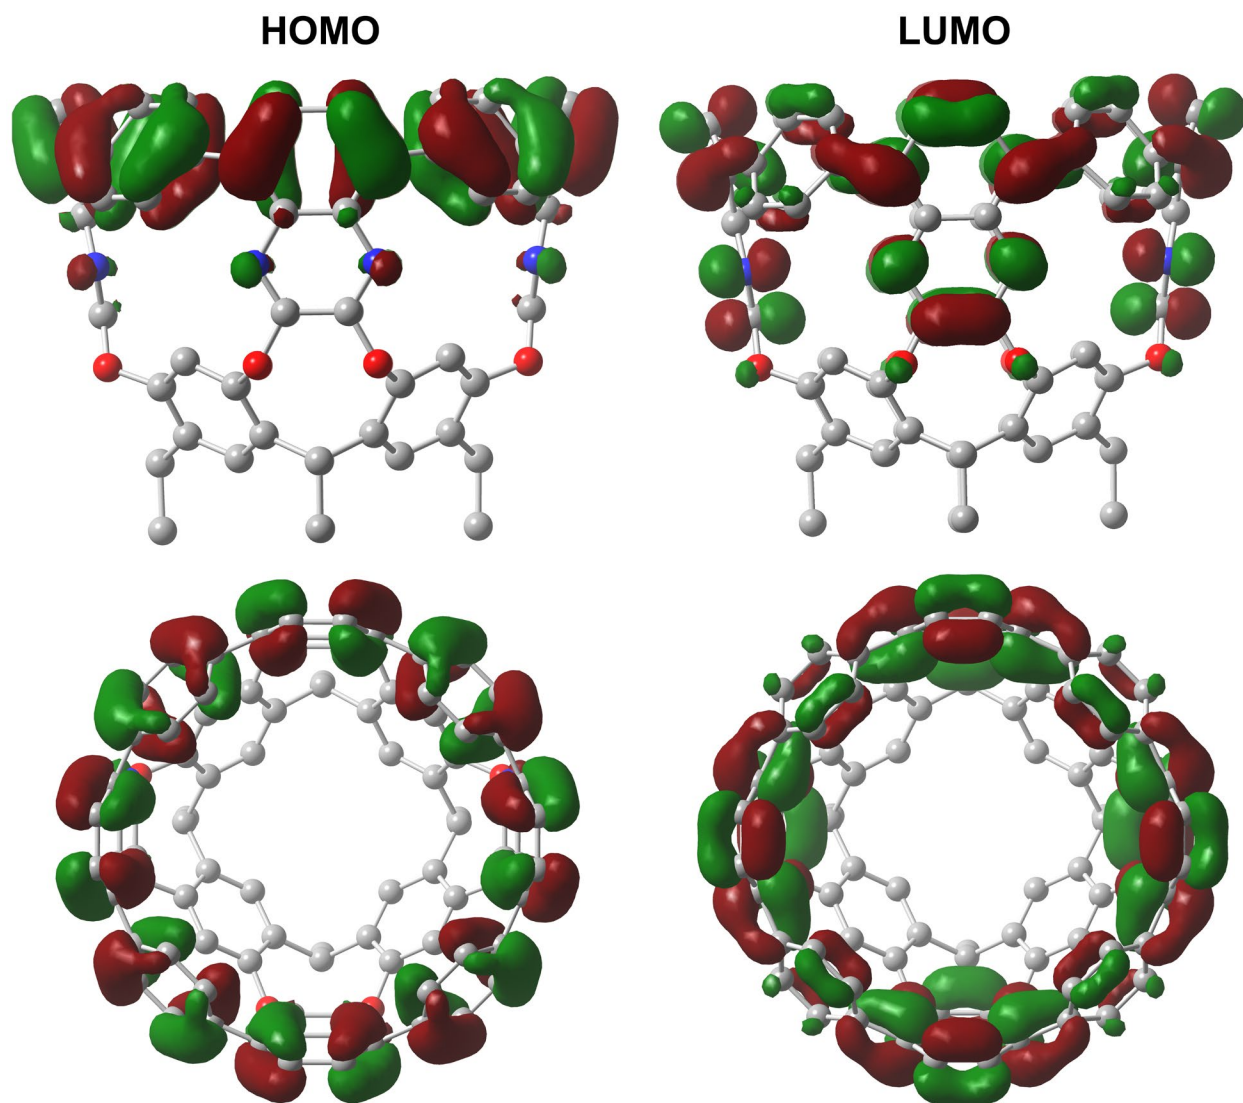

**Figure S18.** HOMO and LUMO ( $\pm 0.02$  au) of tubularene 1 calculated by DFT at the MN15/6-31G\*+PCM(CH<sub>2</sub>Cl<sub>2</sub>) level of theory.

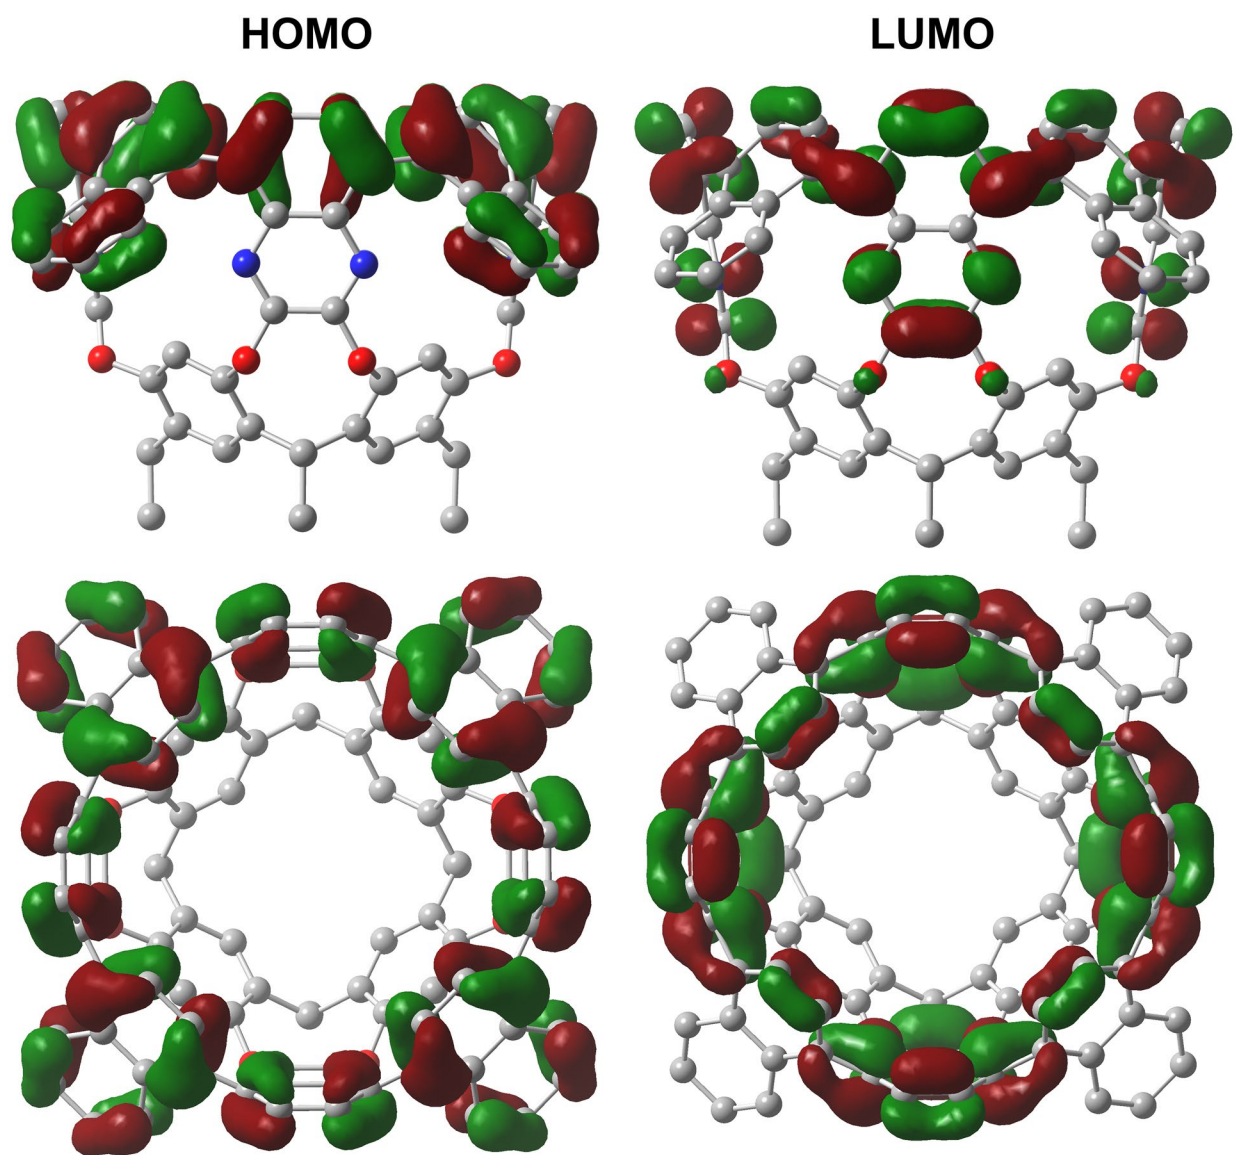

**Figure S19.** HOMO and LUMO ( $\pm 0.02$  au) of tubularene **2** calculated by DFT at the MN15/6-31G\*+PCM(CH<sub>2</sub>Cl<sub>2</sub>) level of theory.



**Table S6.** Calculated HOMO and LUMO energy levels for tubularene **1** and **2** at different levels of theory.

|               | B3LYP | B3LYP-D3BJ | M062X | MN15  | $\omega$ B97XD | Exp.                |
|---------------|-------|------------|-------|-------|----------------|---------------------|
| <b>18 CPP</b> |       |            |       |       |                |                     |
| LUMO          | -1.70 | -1.69      | -0.90 | -1.08 | 0.09           | -1.92 <sup>20</sup> |
| HOMO          | -5.10 | -5.10      | -6.36 | -5.84 | -7.01          | -5.16 <sup>20</sup> |
| <b>1</b>      |       |            |       |       |                |                     |
| LUMO          | -2.42 | -2.48      | -1.69 | -1.85 | -0.76          | -2.79               |
| HOMO          | -5.42 | -5.43      | -6.72 | -6.20 | -7.36          | -5.36               |
| <b>2</b>      |       |            |       |       |                |                     |
| LUMO          | -2.3  | -2.4       | -1.6  | -1.8  | -0.7           | -2.63               |
| HOMO          | -5.3  | -5.3       | -6.6  | -6.1  | -7.2           | -5.27               |

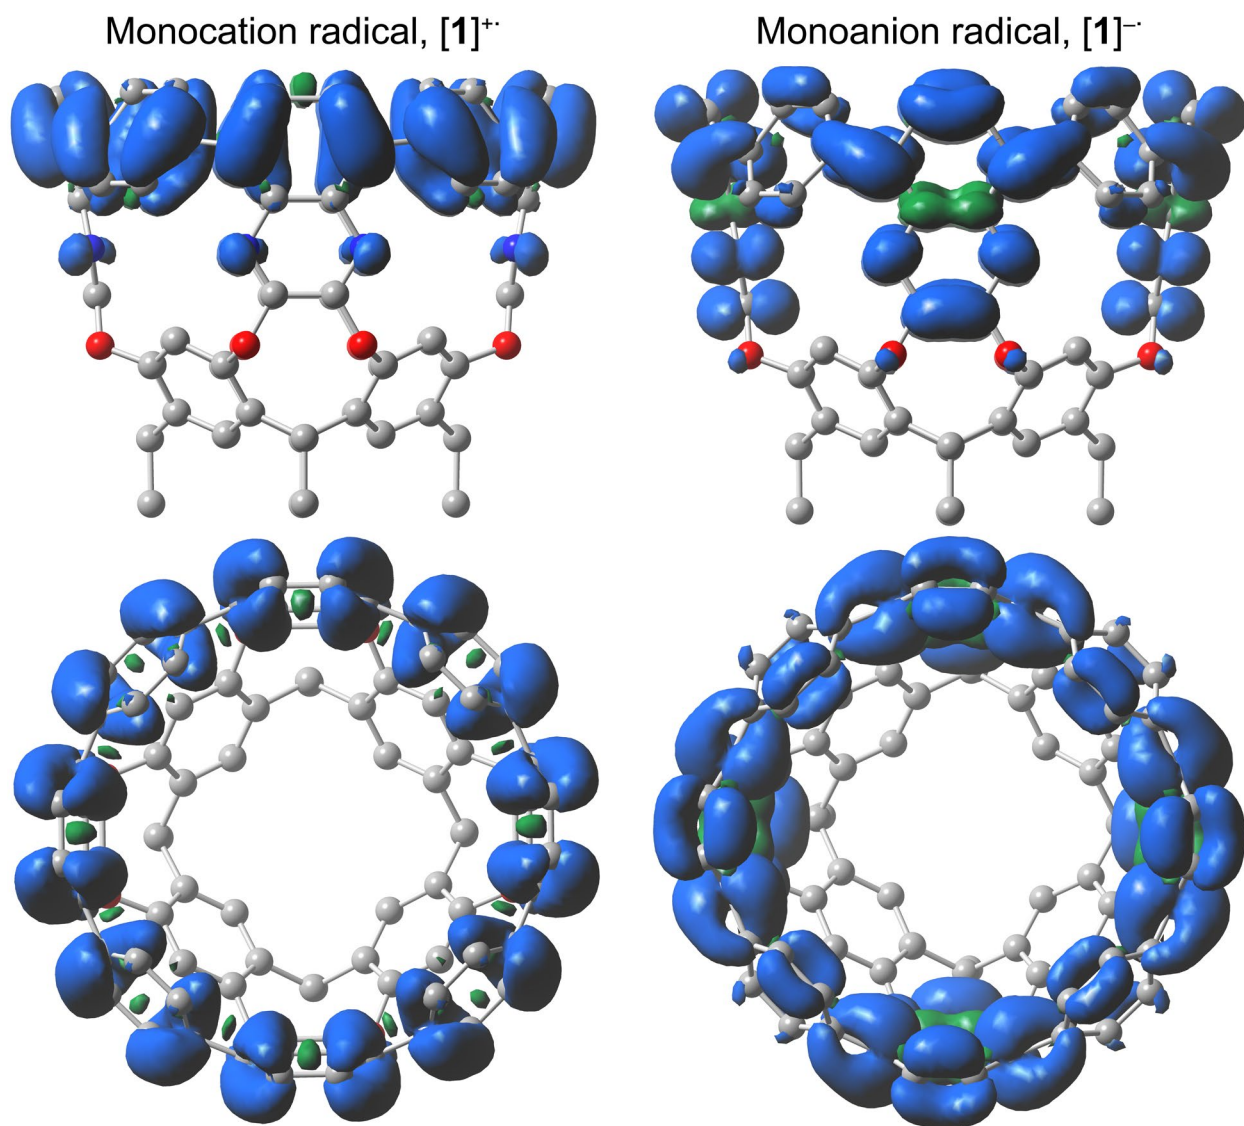

**Figure S20.** Spin density distribution plots ( $\pm 0.0004$  au) in the ground state of radical monocation and monoanion of tubularene **1** calculated by DFT at the  $\omega$ B97XD/6-31G\*+PCM(CH<sub>2</sub>Cl<sub>2</sub>) level of theory.

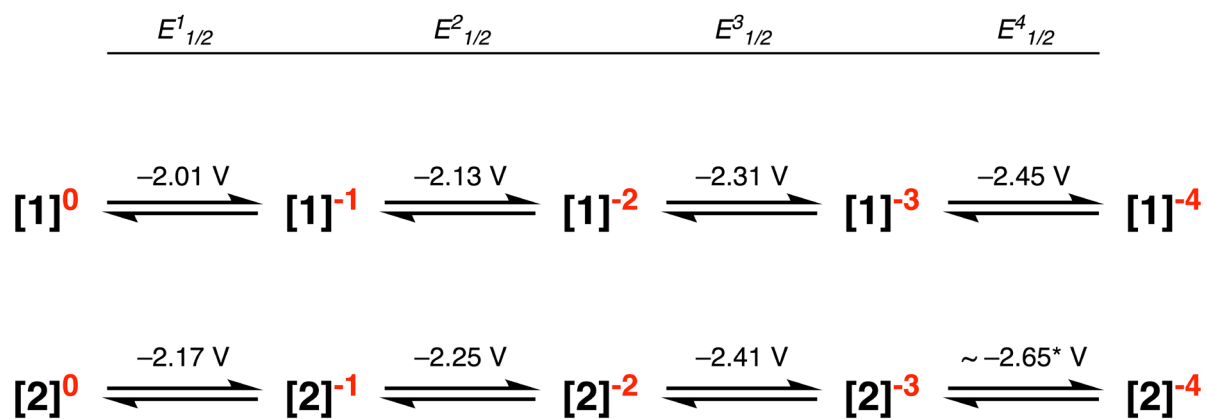

**Figure S21.** Electron transfer series for tubularenes **1** and **2**. The fourth reduction event in **2** coincides with the onset of solvent (*ortho*-dichlorobenzene) reduction. Nonetheless, a shoulder, marked with an asterisk in Figure 2e, is observed in the differential pulsed voltammogram of **2** at around  $-2.65$  V.

**Table S7.** Calculated  $^1\text{H}$  NMR of tubularene **1** by DFT/6-31G\*+PCM( $\text{CH}_2\text{Cl}_2$ ) level of theory.

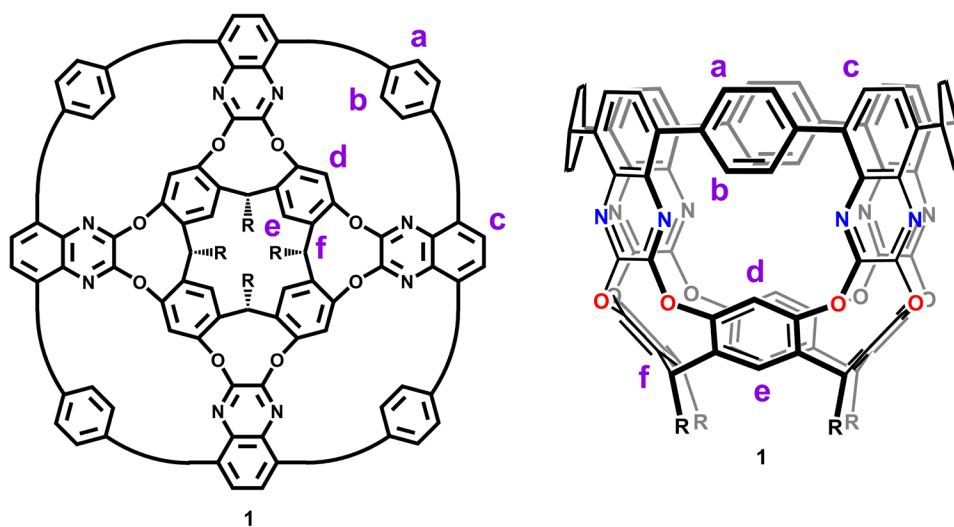

|   | B3LYP-D3BJ | M062X | MN15 | $\omega$ B97XD | Exp.        |
|---|------------|-------|------|----------------|-------------|
| a | 6.9        | 7.4   | 7.3  | 6.9            | <b>6.78</b> |
| b | 8.8        | 9.4   | 9.1  | 8.9            | <b>8.75</b> |
| c | 8.1        | 8.8   | 8.6  | 8.3            | <b>8.11</b> |
| d | 7.9        | 8.4   | 8.3  | 8.0            | <b>7.74</b> |
| e | 7.8        | 8.4   | 8.3  | 8.0            | <b>7.40</b> |
| f | 5.8        | 5.9   | 6.0  | 5.8            | <b>5.80</b> |

**Table S8.** Calculated  $^1\text{H}$  NMR of tubularene **2** by DFT/6-31G\*+PCM(CH<sub>2</sub>Cl<sub>2</sub>) level of theory.

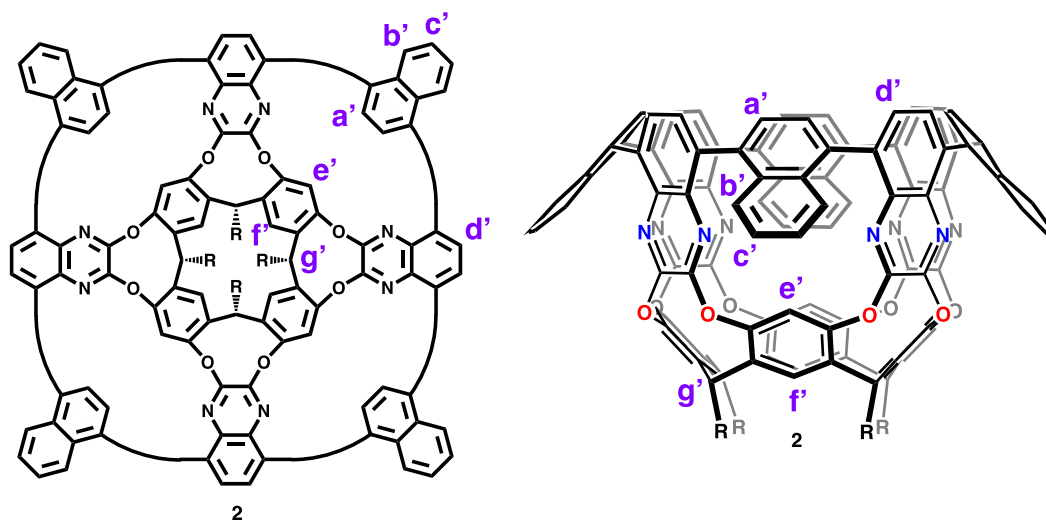

|    | B3LYP-D3BJ | M062X | MN15 | $\omega$ B97XD | Exp.        |
|----|------------|-------|------|----------------|-------------|
| a' | 6.7        | 7.3   | 7.2  | 6.8            | <b>6.55</b> |
| b' | 8.5        | 9.1   | 9.0  | 8.7            | <b>8.42</b> |
| c' | 7.7        | 8.4   | 8.2  | 7.9            | <b>7.63</b> |
| d' | 8.3        | 8.4   | 8.8  | 8.5            | <b>8.30</b> |
| e' | 6.2        | 6.7   | 6.6  | 6.3            | <b>5.98</b> |
| f' | 7.5        | 8.2   | 8.1  | 7.7            | <b>7.07</b> |
| g' | 5.5        | 5.7   | 5.8  | 5.5            | <b>5.46</b> |

## Cartesian Coordinates of all optimized molecules (MN15/6-31G\*+PCM(CH<sub>2</sub>Cl<sub>2</sub>))

|                                              |             |             |            |   |             |             |             |
|----------------------------------------------|-------------|-------------|------------|---|-------------|-------------|-------------|
| <b>1</b>                                     |             |             |            | C | 15.14262300 | 2.31485700  | 8.71705400  |
| Zero-point correction=                       |             |             | 1.160199   | C | 14.90130200 | 1.00151100  | 9.13780200  |
| (Hartree/Particle)                           |             |             |            | C | 13.68332700 | 0.61481800  | 9.69307200  |
| Thermal correction to Energy=                |             | 1.229519    |            | H | 13.52458700 | -0.40608500 | 10.03272600 |
| Thermal correction to Enthalpy=              |             | 1.230463    |            | C | 12.68769900 | 1.57843100  | 9.83918900  |
| Thermal correction to Gibbs Free Energy=     |             | 1.070518    |            | C | 12.87324900 | 2.90611000  | 9.43558800  |
| Sum of electronic and zero-point Energies=   |             |             | -          | C | 14.10323800 | 3.23615300  | 8.86254600  |
| 4415.829816                                  |             |             |            | H | 14.26571300 | 4.26039300  | 8.53318500  |
| Sum of electronic and thermal Energies=      |             |             | -          | C | 10.55897700 | 0.47927200  | 9.93646000  |
| 4415.760496                                  |             |             |            | C | 9.61054400  | -1.57295100 | 9.55641500  |
| Sum of electronic and thermal Enthalpies=    |             |             | -          | C | 8.48887000  | -0.94237200 | 8.93953100  |
| 4415.759552                                  |             |             |            | C | 9.43241500  | 1.11261500  | 9.31687700  |
| Sum of electronic and thermal Free Energies= |             |             | -          | C | 11.76381300 | 3.93280100  | 9.61978300  |
| 4415.919498                                  |             |             |            | H | 11.11434200 | 3.55088500  | 10.41197100 |
| C                                            | 8.34290100  | 3.36277300  | 4.01790300 | C | 12.28693200 | 5.30137100  | 10.06874100 |
| C                                            | 7.30105900  | 1.51476900  | 3.14909600 | H | 12.95231300 | 5.77004400  | 9.33582700  |
| C                                            | 8.04637400  | 1.66016400  | 1.94095300 | H | 11.44800800 | 5.98441900  | 10.23718900 |
| C                                            | 9.09127100  | 3.50902300  | 2.80439000 | C | 10.91337800 | 4.00883600  | 8.35883800  |
| C                                            | 10.81205100 | 5.89653600  | 5.00130500 | C | 9.76046600  | 3.22495800  | 8.22968200  |
| H                                            | 9.88580600  | 6.08546100  | 4.45213100 | C | 8.95600200  | 3.27405100  | 7.09309200  |
| C                                            | 11.34435500 | 7.24750100  | 5.49116600 | H | 8.05354000  | 2.67116600  | 7.02236400  |
| H                                            | 12.27880000 | 7.16357800  | 6.05643300 | C | 9.31522500  | 4.14405900  | 6.06590800  |
| H                                            | 11.53338600 | 7.90579500  | 4.63697300 | C | 10.45648000 | 4.95153700  | 6.14109300  |
| C                                            | 11.75923800 | 5.20423800  | 4.03053900 | C | 11.24212600 | 4.84650400  | 7.29075200  |
| C                                            | 11.26100300 | 4.52356800  | 2.91316300 | H | 12.13864800 | 5.45876900  | 7.36489700  |
| C                                            | 12.09947500 | 3.88742900  | 2.00017000 | O | 8.46821800  | 4.32193400  | 4.97653100  |
| H                                            | 11.69139200 | 3.38215300  | 1.12780600 | O | 9.89399400  | 4.60043000  | 2.66518900  |
| C                                            | 13.47525200 | 3.94880000  | 2.21163100 | O | 14.34952900 | 3.44407600  | 1.25411100  |
| C                                            | 14.02902300 | 4.61450100  | 3.31187700 | O | 16.49521300 | 2.23682300  | 2.43544400  |
| C                                            | 13.14412900 | 5.21439300  | 4.21044800 | O | 17.39142000 | 0.38274300  | 6.78835000  |
| H                                            | 13.55240900 | 5.72875400  | 5.07823100 | O | 15.96461300 | 0.10503200  | 9.09962300  |
| C                                            | 14.51237100 | 2.10228500  | 1.08701800 | O | 11.51032300 | 1.26608600  | 10.51136700 |
| C                                            | 13.96872300 | 0.12530600  | 0.06152500 | O | 9.36333500  | 2.47273900  | 9.33075500  |
| C                                            | 15.08991200 | -0.50563000 | 0.67897100 | O | 8.54164700  | -3.70175100 | 9.30316500  |
| C                                            | 15.63842800 | 1.46861700  | 1.70714000 | C | 7.43379000  | -3.07879000 | 8.69327500  |
| C                                            | 15.53858500 | 4.66748000  | 3.50532600 | C | 6.09933400  | -0.31551000 | 2.17720200  |
| H                                            | 15.98550500 | 4.49903800  | 2.52192000 | C | 6.83578000  | -0.17207000 | 0.98371900  |
| C                                            | 16.02699000 | 6.02990700  | 4.00893400 | C | 13.49978900 | -1.89728200 | -1.13340300 |
| H                                            | 15.62961700 | 6.29307000  | 4.99506100 | C | 14.60743800 | -2.52052400 | -0.52340600 |
| H                                            | 17.11940300 | 6.03087900  | 4.08211200 | C | 15.93875000 | -5.29223500 | 5.99005300  |
| C                                            | 15.98895200 | 3.51275700  | 4.38994000 | C | 15.20260300 | -5.43568000 | 7.18371400  |
| C                                            | 16.40292400 | 2.30177900  | 3.82220200 | H | 12.84639100 | 5.19842600  | 11.00422500 |
| C                                            | 16.82848900 | 1.22722600  | 4.60035800 | H | 17.96417200 | 4.28817200  | 8.17477200  |
| H                                            | 17.16510500 | 0.30248100  | 4.13730600 | H | 15.72343000 | 6.81637000  | 3.31031300  |
| C                                            | 16.84888900 | 1.38089700  | 5.98501700 | H | 10.60582600 | 7.72523200  | 6.14314600  |
| C                                            | 16.44629600 | 2.56891600  | 6.60697300 | H | 5.36538000  | -1.11559800 | 2.24031200  |
| C                                            | 16.00508200 | 3.60667700  | 5.78317300 | H | 6.64316200  | -0.86670000 | 0.16934200  |
| H                                            | 15.67749200 | 4.53535700  | 6.24612600 | H | 12.88709200 | -2.48194600 | -1.81575900 |
| C                                            | 16.72723700 | -0.78647800 | 7.00393200 | H | 14.80890400 | -3.56333800 | -0.75738300 |
| C                                            | 16.27586300 | -2.96906300 | 6.46686300 | H | 16.05466200 | -6.16030600 | 5.34522200  |
| C                                            | 15.53079600 | -3.11432900 | 7.67532800 | H | 14.77723800 | -6.40922400 | 7.41628800  |
| C                                            | 15.97899700 | -0.93246000 | 8.21758300 | H | 8.53658500  | -4.78462200 | 9.40393100  |
| C                                            | 16.49044100 | 2.70208500  | 8.12330600 | H | 6.61448200  | -3.70373400 | 8.34543200  |
| H                                            | 17.21254300 | 1.96303400  | 8.48053800 | N | 13.70562200 | 1.44105400  | 0.31742500  |
| C                                            | 16.97093500 | 4.08148600  | 8.58646300 | N | 15.89155500 | 0.21093100  | 1.52140200  |
| H                                            | 16.30822400 | 4.89582000  | 8.27467400 | N | 16.84307100 | -1.76457300 | 6.16120700  |
| H                                            | 17.03391500 | 4.10705800  | 9.67921500 | N | 15.39039600 | -2.04784700 | 8.51714900  |
|                                              |             |             |            | N | 10.64323800 | -0.81127700 | 10.02474000 |

|   |             |             |             |
|---|-------------|-------------|-------------|
| N | 8.45611000  | 0.41808600  | 8.82212600  |
| N | 7.50352500  | 2.38827600  | 4.17963700  |
| N | 8.95675600  | 2.67181400  | 1.82387900  |
| C | 7.89697500  | 0.71357200  | 0.87746900  |
| C | 6.39309200  | 0.42055700  | 3.31460000  |
| C | 13.07858000 | -0.62786400 | -0.76887800 |
| C | 15.34038600 | -1.90045100 | 0.47654400  |
| C | 16.37575100 | -4.05585100 | 5.54053600  |
| C | 14.87232600 | -4.34879900 | 7.97826200  |
| C | 9.69300000  | -3.00040900 | 9.62600900  |
| C | 7.43065000  | -1.72817200 | 8.38111500  |
| C | 6.35811100  | -1.48552500 | 4.84172800  |
| C | 6.10986500  | -0.11343500 | 4.67397800  |
| C | 5.90655700  | 0.65126200  | 5.83625100  |
| C | 6.16474300  | 0.11631300  | 7.09813000  |
| C | 6.63479100  | -1.20122500 | 7.23985800  |
| C | 6.61497600  | -2.01785300 | 6.09738600  |
| H | 6.50599100  | -2.11446200 | 3.96760100  |
| H | 5.63347200  | 1.69740500  | 5.75324400  |
| H | 6.08677000  | 0.75824400  | 7.96863600  |
| H | 6.95636800  | -3.04738000 | 6.16821700  |
| C | 10.71894700 | -1.21833700 | -0.55177200 |
| C | 11.65171500 | -0.22394800 | -0.88873600 |
| C | 11.17273100 | 1.09182100  | -1.01651600 |
| C | 9.88239100  | 1.42581800  | -0.60593000 |
| C | 9.02781700  | 0.45514900  | -0.05409200 |
| C | 9.43491300  | -0.88603000 | -0.14332200 |
| H | 11.04627600 | -2.25052200 | -0.45722400 |
| H | 11.83941200 | 1.87860800  | -1.35186500 |
| H | 9.57375000  | 2.46506700  | -0.63108800 |
| H | 8.79600500  | -1.66826300 | 0.25841700  |
| C | 15.59554000 | -4.35194900 | 3.24467300  |
| C | 16.56241800 | -3.78342900 | 4.08986500  |
| C | 17.40992200 | -2.80838200 | 3.53474500  |
| C | 17.15229700 | -2.27151000 | 2.27362500  |
| C | 16.03848600 | -2.69167000 | 1.52544700  |
| C | 15.33914400 | -3.81762800 | 1.98974700  |
| H | 14.93041000 | -5.11997800 | 3.63100900  |
| H | 18.22189800 | -2.39942500 | 4.12579500  |
| H | 17.76964800 | -1.45685800 | 1.91144900  |
| H | 14.48103100 | -4.18345800 | 1.43181700  |
| C | 12.51881500 | -4.95122300 | 8.23130900  |
| C | 13.64476300 | -4.35159300 | 8.81882400  |
| C | 13.43436300 | -3.58267700 | 9.97710300  |
| C | 12.14445700 | -3.24706300 | 10.38773700 |
| C | 11.02181700 | -3.66909500 | 9.65385400  |
| C | 11.23526600 | -4.61721700 | 8.63991200  |
| H | 12.64068900 | -5.56548000 | 7.34285800  |
| H | 12.01755000 | -2.57717700 | 11.23100100 |
| H | 14.28206300 | -3.16641500 | 10.51007500 |
| H | 10.39134100 | -4.98029400 | 8.05895300  |

## 2

|                                            |          |
|--------------------------------------------|----------|
| Zero-point correction=                     | 1.346408 |
| (Hartree/Particle)                         |          |
| Thermal correction to Energy=              | 1.427163 |
| Thermal correction to Enthalpy=            | 1.428107 |
| Thermal correction to Gibbs Free Energy=   | 1.244698 |
| Sum of electronic and zero-point Energies= | -        |
| 5029.487353                                |          |

|                                              |             |             |             |
|----------------------------------------------|-------------|-------------|-------------|
| Sum of electronic and thermal Energies=      | -           |             |             |
| 5029.406598                                  |             |             |             |
| Sum of electronic and thermal Enthalpies=    | -           |             |             |
| 5029.405654                                  |             |             |             |
| Sum of electronic and thermal Free Energies= | -           |             |             |
| 5029.589063                                  |             |             |             |
| C                                            | 7.99942000  | 2.14134300  | 4.46747700  |
| C                                            | 6.93652000  | 0.29848000  | 3.61841200  |
| C                                            | 7.70002700  | 0.40847400  | 2.41819900  |
| C                                            | 8.76674900  | 2.25183200  | 3.26113200  |
| C                                            | 10.47739900 | 4.66566200  | 5.42348200  |
| H                                            | 9.56071100  | 4.85166600  | 4.85775200  |
| C                                            | 11.01628900 | 6.02211200  | 5.89088300  |
| H                                            | 11.94123500 | 5.94153400  | 6.47195700  |
| H                                            | 11.22470300 | 6.65910100  | 5.02509400  |
| C                                            | 11.43111200 | 3.94431300  | 4.48102000  |
| C                                            | 10.94229600 | 3.25043100  | 3.36751800  |
| C                                            | 11.78554700 | 2.59218600  | 2.47430800  |
| H                                            | 11.38613100 | 2.08932600  | 1.59531200  |
| C                                            | 13.15804100 | 2.63724400  | 2.71190000  |
| C                                            | 13.70293000 | 3.31610600  | 3.80857400  |
| C                                            | 12.81273600 | 3.94376800  | 4.68206100  |
| H                                            | 13.21381200 | 4.47022700  | 5.54594200  |
| C                                            | 14.19234000 | 0.74946700  | 1.65976200  |
| C                                            | 13.65410400 | -1.24221100 | 0.66447600  |
| C                                            | 14.76156500 | -1.86733200 | 1.31123200  |
| C                                            | 15.30497100 | 0.12105300  | 2.31050700  |
| C                                            | 15.20983700 | 3.35806100  | 4.02216700  |
| H                                            | 15.66850700 | 3.16170500  | 3.04954800  |
| C                                            | 15.70469600 | 4.72805100  | 4.49868700  |
| H                                            | 15.29750400 | 5.01859300  | 5.47296600  |
| H                                            | 16.79608200 | 4.72076700  | 4.58583100  |
| C                                            | 15.63905300 | 2.22268100  | 4.94129300  |
| C                                            | 16.06012000 | 0.99796100  | 4.40918200  |
| C                                            | 16.47811000 | -0.05784100 | 5.21708600  |
| H                                            | 16.83647200 | -0.98845600 | 4.78054700  |
| C                                            | 16.47031000 | 0.12903500  | 6.59811500  |
| C                                            | 16.05864100 | 1.33145000  | 7.18571400  |
| C                                            | 15.63360500 | 2.35093200  | 6.33161600  |
| H                                            | 15.30094100 | 3.29116900  | 6.76713100  |
| C                                            | 16.31010300 | -2.00833500 | 7.66918900  |
| C                                            | 15.86684700 | -4.20391800 | 7.18981400  |
| C                                            | 15.10256100 | -4.31386400 | 8.38978300  |
| C                                            | 15.54262600 | -2.11909600 | 8.87532000  |
| C                                            | 16.08199700 | 1.50094900  | 8.69879300  |
| H                                            | 16.79404000 | 0.76635000  | 9.08396800  |
| C                                            | 16.56655600 | 2.88815600  | 9.13408500  |
| H                                            | 15.91443200 | 3.69927300  | 8.79295400  |
| H                                            | 16.61483100 | 2.94060400  | 10.22665100 |
| C                                            | 14.72426100 | 1.13865500  | 9.28512600  |
| C                                            | 14.47011500 | -0.15999800 | 9.74256600  |
| C                                            | 13.24546300 | -0.52489900 | 10.29889000 |
| H                                            | 13.08325500 | -1.53109500 | 10.68173000 |
| C                                            | 12.25220100 | 0.44805400  | 10.39512700 |
| C                                            | 12.45058200 | 1.76236100  | 9.95501700  |
| C                                            | 13.68994800 | 2.07044300  | 9.39087100  |
| H                                            | 13.86343200 | 3.08413800  | 9.03538900  |
| C                                            | 10.11180600 | -0.62724600 | 10.47146300 |
| C                                            | 9.14388600  | -2.67657000 | 10.13843900 |
| C                                            | 8.03619600  | -2.05105900 | 9.49244600  |
| C                                            | 8.99828900  | 0.00149400  | 9.82259900  |
| C                                            | 11.34572500 | 2.80036600  | 10.09677000 |

|   |             |             |             |   |             |             |             |
|---|-------------|-------------|-------------|---|-------------|-------------|-------------|
| H | 10.68166200 | 2.44265100  | 10.88802900 | C | 19.34673200 | -3.25857200 | 4.17360500  |
| C | 11.87267600 | 4.17545000  | 10.52140700 | C | 19.10150700 | -2.74397500 | 2.87539800  |
| H | 12.55029300 | 4.62307700  | 9.78655800  | C | 17.90342300 | -2.99067700 | 2.25024900  |
| H | 11.03631200 | 4.86759300  | 10.66356300 | C | 16.89564800 | -3.77243200 | 2.87740400  |
| C | 10.51348100 | 2.85553000  | 8.82289200  | C | 12.95174600 | -4.89667400 | 10.77284200 |
| C | 9.34860300  | 2.08854400  | 8.69976600  | C | 14.02266600 | -4.63715600 | 11.67063800 |
| C | 8.55171600  | 2.12695900  | 7.55708200  | C | 13.79635400 | -4.06030100 | 12.89670600 |
| H | 7.63067900  | 1.54971300  | 7.49856100  | C | 12.48066900 | -3.69880800 | 13.28206800 |
| C | 8.94164200  | 2.96226300  | 6.51200300  | C | 11.42581000 | -3.92362800 | 12.43126400 |
| C | 10.09620800 | 3.75147700  | 6.57982000  | C | 11.62349600 | -4.53174200 | 11.16187900 |
| C | 10.86792600 | 3.66237700  | 7.73984600  | C | 6.22103500  | -2.35717900 | 7.75532000  |
| H | 11.77398300 | 4.26111100  | 7.80952500  | C | 5.73265200  | -1.31495500 | 5.15271800  |
| O | 8.11647000  | 3.12303100  | 5.40401200  | C | 6.16218100  | -2.61674800 | 5.33784000  |
| O | 9.57900700  | 3.33368300  | 3.10491000  | H | 6.48137300  | -3.20057400 | 4.47845900  |
| O | 14.04298500 | 2.09733400  | 1.78462100  | C | 6.40358700  | -3.13177200 | 6.62396300  |
| O | 16.16362700 | 0.89941600  | 3.02570900  | H | 6.90053100  | -4.09447200 | 6.71086400  |
| O | 16.99005100 | -0.85161700 | 7.43636100  | C | 11.33937900 | -1.62010400 | -0.28663800 |
| O | 15.52794400 | -1.06291300 | 9.73475700  | C | 8.70108200  | -0.88674600 | 0.48817100  |
| O | 11.05843500 | 0.16306100  | 11.04924700 | C | 9.15838400  | -2.18457700 | 0.62940900  |
| O | 8.93535900  | 1.36193300  | 9.81142300  | H | 8.56860900  | -2.89916700 | 1.19755700  |
| C | 8.05604800  | -4.80317800 | 9.92750600  | C | 10.46210700 | -2.54707000 | 0.24662800  |
| C | 6.96096200  | -4.18472900 | 9.28800000  | H | 10.83146500 | -3.52834600 | 0.53291800  |
| C | 5.71790700  | -1.53399200 | 2.66549300  | C | 15.64822000 | -4.05306200 | 2.22911500  |
| C | 6.47287100  | -1.42505200 | 1.47852300  | C | 16.14075200 | -5.08811600 | 4.83396000  |
| C | 13.18620600 | -3.28837700 | -0.49515200 | C | 15.06523400 | -5.52034400 | 4.07894900  |
| C | 14.28155200 | -3.90654000 | 0.14418300  | C | 14.29971400 | -6.13572200 | 4.54427800  |
| C | 15.53112800 | -6.54100200 | 6.77124400  | H | 14.82167800 | -5.00874900 | 2.79188100  |
| C | 14.77538800 | -6.64974000 | 7.95770400  | H | 13.87705500 | -5.24772200 | 2.31036400  |
| H | 12.41951800 | 4.09012300  | 11.46611500 | C | 13.17048200 | -5.51580600 | 9.49847300  |
| H | 17.56686600 | 3.07725900  | 8.73109700  | C | 10.52965700 | -4.79027900 | 10.27190900 |
| H | 15.41732600 | 5.49998600  | 3.77734900  | C | 12.06678700 | -5.95213600 | 8.78784300  |
| H | 10.27309800 | 6.52166600  | 6.52087600  | H | 12.20922100 | -6.43682300 | 7.82552500  |
| N | 13.38610800 | 0.07554100  | 0.90134600  | C | 10.76178700 | -5.59355900 | 9.17000200  |
| N | 15.54567300 | -1.14381600 | 2.16349800  | H | 9.94413500  | -5.81429600 | 8.48882300  |
| N | 16.42780800 | -3.00606900 | 6.85060500  | H | 4.44528300  | 1.05910300  | 5.18160700  |
| N | 14.93750000 | -3.22064000 | 9.19119900  | H | 5.29809800  | -0.76215200 | 9.73012400  |
| N | 10.18684100 | -1.91607900 | 10.58377900 | H | 12.59351900 | 0.28816200  | -1.72883700 |
| N | 8.02633100  | -0.69601700 | 9.32432200  | H | 7.98308500  | 1.57030000  | -0.37419200 |
| N | 7.15019000  | 1.17783700  | 4.64099600  | H | 18.56588900 | -4.40445900 | 5.80856600  |
| N | 8.63967700  | 1.39209500  | 2.29970700  | H | 17.70513000 | -2.59923200 | 1.25529300  |
| C | 7.54651000  | -0.55541900 | 1.37148400  | H | 10.41327300 | -3.64877000 | 12.71712800 |
| C | 6.00814900  | -0.77730200 | 3.78962700  | H | 15.02829000 | -4.91650400 | 11.36535300 |
| C | 12.77411500 | -2.00698700 | -0.16559800 | H | 11.66401700 | 2.47574500  | -2.41575700 |
| C | 15.00598200 | -3.26675600 | 1.13729700  | H | 9.35008100  | 3.11935600  | -1.73598000 |
| C | 15.97936800 | -5.31792400 | 6.29836500  | H | 19.86628200 | -2.15552300 | 2.37529200  |
| C | 14.43939600 | -5.53955000 | 8.71599200  | H | 20.29799100 | -3.06137100 | 4.66093100  |
| C | 9.20724200  | -4.10205700 | 10.24932600 | H | 14.62547800 | -3.88183800 | 13.57639700 |
| C | 6.97545800  | -2.84175400 | 8.94652400  | H | 12.30914200 | -3.24540000 | 14.25483200 |
| C | 5.30060900  | -0.57622100 | 6.30279200  | H | 4.10114900  | 1.38650400  | 9.46070200  |
| C | 4.62563400  | 0.66857300  | 6.18035400  | H | 3.67302700  | 2.30062600  | 7.17776200  |
| C | 4.20012900  | 1.35684700  | 7.29053300  | H | 14.32603500 | -7.60918600 | 8.20346700  |
| C | 4.44330300  | 0.83762900  | 8.58724300  | H | 15.64031600 | -7.42007200 | 6.14023800  |
| C | 5.10566600  | -0.35622400 | 8.73981700  | H | 8.05057500  | -5.88482600 | 10.04096500 |
| C | 5.54614500  | -1.10043200 | 7.61191600  | H | 6.14643100  | -4.80940200 | 8.92857200  |
| C | 10.81892600 | -0.34092600 | -0.67138000 | H | 6.29670500  | -2.14302700 | 0.68081500  |
| C | 11.58606100 | 0.57700100  | -1.43882200 | H | 4.98388900  | -2.33259300 | 2.74508500  |
| C | 11.06820100 | 1.79190600  | -1.81689800 | H | 12.56585100 | -3.88517600 | -1.15987200 |
| C | 9.75379400  | 2.15752100  | -1.43074000 | H | 14.47058300 | -4.96018700 | -0.04807800 |
| C | 8.99162400  | 1.29854400  | -0.67669800 |   |             |             |             |
| C | 9.49198500  | 0.02824000  | -0.28153600 |   |             |             |             |
| C | 17.14334200 | -4.29264700 | 4.18777100  |   |             |             |             |
| C | 18.38776400 | -4.00675800 | 4.81226000  |   |             |             |             |



# 1 (Anion Radical)

Zero-point correction= 1.156318  
(Hartree/Particle)

Thermal correction to Energy= 1.225876  
Thermal correction to Enthalpy= 1.226821

Thermal correction to Gibbs Free Energy= 1.065829

Sum of electronic and zero-point Energies= -  
4415.937981

Sum of electronic and thermal Energies= -  
4415.868422

Sum of electronic and thermal Enthalpies= -  
4415.867478

Sum of electronic and thermal Free Energies= -  
4416.028470

|   |             |             |             |
|---|-------------|-------------|-------------|
| C | 8.35222800  | 3.35486700  | 4.01780000  |
| C | 7.30871600  | 1.50404700  | 3.14697800  |
| C | 8.05870000  | 1.64739200  | 1.94002000  |
| C | 9.09959000  | 3.50016700  | 2.80592200  |
| C | 10.81517400 | 5.88375500  | 5.00380200  |
| H | 9.88815200  | 6.06995100  | 4.45486700  |
| C | 11.34396700 | 7.23682700  | 5.49205600  |
| H | 12.27758800 | 7.15461400  | 6.05899700  |
| H | 11.53307400 | 7.89581200  | 4.63805900  |
| C | 11.76350100 | 5.19747200  | 4.03041800  |
| C | 11.26652600 | 4.51957600  | 2.91065500  |
| C | 12.10627000 | 3.88749700  | 1.99584700  |
| H | 11.69753600 | 3.38091300  | 1.12455500  |
| C | 13.48194500 | 3.95245500  | 2.20557800  |
| C | 14.03433300 | 4.61716600  | 3.30686300  |
| C | 13.14852300 | 5.21117200  | 4.20842000  |
| H | 13.55581600 | 5.72194300  | 5.07884000  |
| C | 14.52310700 | 2.11139000  | 1.07470600  |
| C | 13.98604500 | 0.13717600  | 0.03942100  |
| C | 15.10658400 | -0.49424000 | 0.65763600  |
| C | 15.64837600 | 1.47732500  | 1.69550700  |
| C | 15.54345000 | 4.67165700  | 3.50117800  |
| H | 15.99158300 | 4.50491600  | 2.51799900  |
| C | 16.03061100 | 6.03334000  | 4.00783600  |
| H | 15.63260700 | 6.29323600  | 4.99454200  |
| H | 17.12309800 | 6.03526600  | 4.08171400  |
| C | 15.99219700 | 3.51585200  | 4.38465300  |
| C | 16.40632700 | 2.30583200  | 3.81553900  |
| C | 16.82816000 | 1.22958800  | 4.59299000  |
| H | 17.16311100 | 0.30419500  | 4.13001700  |
| C | 16.84455400 | 1.38024800  | 5.97818100  |
| C | 16.43869300 | 2.56649900  | 6.60154700  |
| C | 16.00204200 | 3.60641500  | 5.77816400  |
| H | 15.67072800 | 4.53329400  | 6.24232500  |
| C | 16.71603400 | -0.78644400 | 6.99603500  |
| C | 16.26305300 | -2.96991000 | 6.45334200  |
| C | 15.52073000 | -3.11748300 | 7.66460800  |
| C | 15.96793300 | -0.93128500 | 8.20747200  |
| C | 16.47564900 | 2.69499700  | 8.11808800  |
| H | 17.19499900 | 1.95308900  | 8.47509200  |
| C | 16.96018800 | 4.07189200  | 8.58501800  |
| H | 16.29898100 | 4.88828800  | 8.27520600  |
| H | 17.02159500 | 4.09456100  | 9.67803900  |
| C | 15.12647300 | 2.31103000  | 8.71148300  |
| C | 14.88123300 | 0.99970000  | 9.13555500  |
| C | 13.66558100 | 0.61900100  | 9.70174300  |
| H | 13.50054800 | -0.40194700 | 10.03892400 |

|   |             |             |             |
|---|-------------|-------------|-------------|
| C | 12.67104300 | 1.58533600  | 9.86550300  |
| C | 12.86539800 | 2.90994200  | 9.44675400  |
| C | 14.08964800 | 3.23478700  | 8.85966100  |
| H | 14.25082800 | 4.25729200  | 8.52258700  |
| C | 10.52968400 | 0.51618600  | 9.97595100  |
| C | 9.59891100  | -1.56499300 | 9.62191000  |
| C | 8.45673900  | -0.92352700 | 8.99111600  |
| C | 9.43973300  | 1.12860500  | 9.37254700  |
| C | 11.76010800 | 3.94020600  | 9.63068300  |
| H | 11.11006600 | 3.55683100  | 10.42156800 |
| C | 12.28627900 | 5.30858500  | 10.07632900 |
| H | 12.95278700 | 5.77402000  | 9.34178800  |
| H | 11.44977300 | 5.99545500  | 10.24348500 |
| C | 10.90889800 | 4.01232400  | 8.37078300  |
| C | 9.75128400  | 3.22823800  | 8.25601500  |
| C | 8.95769800  | 3.27038700  | 7.10781400  |
| H | 8.05854700  | 2.66229500  | 7.03813900  |
| C | 9.32025900  | 4.13230000  | 6.07445500  |
| C | 10.46111900 | 4.94028200  | 6.14547700  |
| C | 11.24423300 | 4.83996700  | 7.29742900  |
| H | 12.14416100 | 5.44835400  | 7.36910900  |
| O | 8.47286000  | 4.31024500  | 4.98132100  |
| O | 9.90050700  | 4.59469000  | 2.66095300  |
| O | 14.35706700 | 3.45267200  | 1.24492700  |
| O | 16.50343100 | 2.24374900  | 2.42813400  |
| O | 17.38684500 | 0.38106200  | 6.77904300  |
| O | 15.94743100 | 0.10176400  | 9.09512100  |
| O | 11.51639900 | 1.28866500  | 10.56302300 |
| O | 9.34234400  | 2.50907700  | 9.36209200  |
| C | 8.54393200  | -3.72219300 | 9.25075800  |
| C | 7.45939900  | -3.11283900 | 8.65238100  |
| C | 6.11791700  | -0.33525100 | 2.17995900  |
| C | 6.86276100  | -0.19813000 | 0.99300800  |
| C | 13.52310400 | -1.88222800 | -1.16304600 |
| C | 14.63010600 | -2.50575600 | -0.55251700 |
| C | 15.90686400 | -5.28722200 | 5.96802300  |
| C | 15.18300700 | -5.43564300 | 7.16655000  |
| H | 12.84673900 | 5.20795600  | 11.01186900 |
| H | 17.95452100 | 4.27837800  | 8.17511800  |
| H | 15.72655600 | 6.82163500  | 3.31132600  |
| H | 10.60395400 | 7.71321100  | 6.14354200  |
| H | 5.38010100  | -1.13200200 | 2.23914900  |
| H | 6.67632700  | -0.89789800 | 0.18102000  |
| H | 12.91191800 | -2.46608600 | -1.84756900 |
| H | 14.83290600 | -3.54801400 | -0.78824000 |
| H | 16.01572900 | -6.15321100 | 5.31843500  |
| H | 14.76492500 | -6.41170500 | 7.40147100  |
| H | 8.54552000  | -4.80410400 | 9.37466600  |
| H | 6.62399600  | -3.72425000 | 8.31453600  |
| N | 13.72144100 | 1.45210500  | 0.29791800  |
| N | 15.90561000 | 0.22133000  | 1.50327800  |
| N | 16.83423200 | -1.76555500 | 6.15359300  |
| N | 15.38722800 | -2.05143800 | 8.50524600  |
| N | 10.61576500 | -0.80204400 | 10.10472300 |
| N | 8.41905600  | 0.43172200  | 8.88938500  |
| N | 7.50786000  | 2.38291800  | 4.17131600  |
| N | 8.96419100  | 2.66386100  | 1.82374700  |
| C | 7.91609200  | 0.69769300  | 0.87896200  |
| C | 6.40305700  | 0.40530600  | 3.32073700  |
| C | 13.09773700 | -0.61531100 | -0.79407600 |
| C | 15.35865200 | -1.88874600 | 0.45270600  |
| C | 16.35727500 | -4.05285300 | 5.52257400  |

|   |             |             |             |
|---|-------------|-------------|-------------|
| C | 14.85555500 | -4.35102100 | 7.97116400  |
| C | 9.69431400  | -2.99134800 | 9.63759300  |
| C | 7.43342400  | -1.72088400 | 8.39112700  |
| C | 6.27191300  | -1.49480300 | 4.86557600  |
| C | 6.09730800  | -0.10926900 | 4.67636300  |
| C | 5.96366500  | 0.67198400  | 5.83958800  |
| C | 6.22906300  | 0.13996200  | 7.09822300  |
| C | 6.65378400  | -1.19828200 | 7.25611800  |
| C | 6.52836000  | -2.02609100 | 6.11970000  |
| H | 6.36547400  | -2.14434900 | 3.99796200  |
| H | 5.73115700  | 1.72797800  | 5.75632600  |
| H | 6.20141500  | 0.79477300  | 7.96095800  |
| H | 6.81073400  | -3.07361600 | 6.19171600  |
| C | 10.74178600 | -1.21778100 | -0.57273600 |
| C | 11.66914600 | -0.21768000 | -0.90924700 |
| C | 11.18279200 | 1.09615700  | -1.02713000 |
| C | 9.89288100  | 1.42145500  | -0.60848300 |
| C | 9.04542100  | 0.44506700  | -0.05472100 |
| C | 9.45871300  | -0.89363200 | -0.15530000 |
| H | 11.07472200 | -2.24866300 | -0.48295000 |
| H | 11.84428100 | 1.88834800  | -1.36049300 |
| H | 9.57950400  | 2.45945100  | -0.62615100 |
| H | 8.82668100  | -1.68070800 | 0.24789400  |
| C | 15.58879700 | -4.34446900 | 3.21862700  |
| C | 16.54850900 | -3.77810100 | 4.07374700  |
| C | 17.40257100 | -2.80484700 | 3.52459900  |
| C | 17.15619100 | -2.26563900 | 2.26236700  |
| C | 16.04879600 | -2.68346400 | 1.50366300  |
| C | 15.34407400 | -3.80893900 | 1.96200900  |
| H | 14.91760100 | -5.10996700 | 3.59947300  |
| H | 18.21000900 | -2.39755500 | 4.12297000  |
| H | 17.77718800 | -1.45060600 | 1.90696300  |
| H | 14.48840000 | -4.17131000 | 1.39796600  |
| C | 12.51839600 | -5.01393700 | 8.30967900  |
| C | 13.65132900 | -4.36050600 | 8.83457400  |
| C | 13.43678100 | -3.53099000 | 9.95132800  |
| C | 12.15020700 | -3.18699600 | 10.35552100 |
| C | 11.01185400 | -3.64906200 | 9.65753900  |
| C | 11.23723200 | -4.67921900 | 8.71896600  |
| H | 12.63321100 | -5.67890200 | 7.45635000  |
| H | 12.02746500 | -2.47459000 | 11.16252000 |
| H | 14.28267100 | -3.07978300 | 10.45813200 |
| H | 10.39326400 | -5.09591300 | 8.17466100  |

## 1 (Cation Radical)

|                                              |            |            |            |
|----------------------------------------------|------------|------------|------------|
| Zero-point correction=                       | 1.158671   |            |            |
| (Hartree/Particle)                           |            |            |            |
| Thermal correction to Energy=                | 1.228353   |            |            |
| Thermal correction to Enthalpy=              | 1.229297   |            |            |
| Thermal correction to Gibbs Free Energy=     | 1.067756   |            |            |
| Sum of electronic and zero-point Energies=   | -          |            |            |
| 4415.638970                                  |            |            |            |
| Sum of electronic and thermal Energies=      | -          |            |            |
| 4415.569288                                  |            |            |            |
| Sum of electronic and thermal Enthalpies=    | -          |            |            |
| 4415.568343                                  |            |            |            |
| Sum of electronic and thermal Free Energies= | -          |            |            |
| 4415.729885                                  |            |            |            |
| C                                            | 8.35590200 | 3.36444000 | 4.00689400 |
| C                                            | 7.31924600 | 1.51647400 | 3.13213900 |
| C                                            | 8.05323700 | 1.67559500 | 1.91990800 |

|   |             |             |             |
|---|-------------|-------------|-------------|
| C | 9.09489700  | 3.52426200  | 2.78860800  |
| C | 10.81473400 | 5.90076500  | 5.00281800  |
| H | 9.88688700  | 6.09145900  | 4.45701300  |
| C | 11.34888900 | 7.25044900  | 5.49421100  |
| H | 12.28690500 | 7.16605700  | 6.05344800  |
| H | 11.53198400 | 7.91101500  | 4.64069100  |
| C | 11.75928700 | 5.21032700  | 4.02788200  |
| C | 11.26158200 | 4.53872700  | 2.90484600  |
| C | 12.10029200 | 3.90703800  | 1.98901700  |
| H | 11.69319700 | 3.41085000  | 1.11100000  |
| C | 13.47570400 | 3.96266200  | 2.20381500  |
| C | 14.02932500 | 4.61947500  | 3.30938000  |
| C | 13.14390400 | 5.21498300  | 4.21036000  |
| H | 13.55179700 | 5.72275200  | 5.08217800  |
| C | 14.50590600 | 2.11711400  | 1.07635600  |
| C | 13.95513600 | 0.14185400  | 0.05049500  |
| C | 15.06479600 | -0.49661500 | 0.67883500  |
| C | 15.62273700 | 1.47526000  | 1.70624100  |
| C | 15.53858400 | 4.67093900  | 3.50659500  |
| H | 15.98808400 | 4.50221700  | 2.52444100  |
| C | 16.02683400 | 6.03298500  | 4.01141300  |
| H | 15.62391200 | 6.29915100  | 4.99445400  |
| H | 17.11873000 | 6.03183400  | 4.09069400  |
| C | 15.98447900 | 3.51540700  | 4.39239200  |
| C | 16.39159800 | 2.30218800  | 3.82442600  |
| C | 16.81497000 | 1.22619500  | 4.60190500  |
| H | 17.15138000 | 0.30230300  | 4.13769800  |
| C | 16.83527800 | 1.38164800  | 5.98573500  |
| C | 16.44076900 | 2.57078500  | 6.60944800  |
| C | 16.00439600 | 3.61072900  | 5.78548700  |
| H | 15.68590300 | 4.54264700  | 6.24776600  |
| C | 16.70789200 | -0.78186300 | 7.01632500  |
| C | 16.21576000 | -2.95523400 | 6.47862100  |
| C | 15.49779000 | -3.10125700 | 7.69753700  |
| C | 15.97868200 | -0.92702100 | 8.24327500  |
| C | 16.49107400 | 2.70470400  | 8.12582500  |
| H | 17.21705500 | 1.96864700  | 8.48146900  |
| C | 16.96959500 | 4.08549900  | 8.58717900  |
| H | 16.30260300 | 4.89799000  | 8.28026800  |
| H | 17.03918500 | 4.10969300  | 9.67938700  |
| C | 15.14640800 | 2.31577800  | 8.72622100  |
| C | 14.90928200 | 1.00721900  | 9.16158400  |
| C | 13.69624700 | 0.62230200  | 9.72659600  |
| H | 13.54419400 | -0.39376400 | 10.08132900 |
| C | 12.69749100 | 1.58292000  | 9.86292300  |
| C | 12.87521100 | 2.90681800  | 9.44619100  |
| C | 14.10332200 | 3.23414600  | 8.86664500  |
| H | 14.26147100 | 4.25545500  | 8.52702700  |
| C | 10.57621600 | 0.47852700  | 9.95613700  |
| C | 9.65358600  | -1.58084400 | 9.55063200  |
| C | 8.54676400  | -0.96012200 | 8.90914700  |
| C | 9.45642900  | 1.10465000  | 9.31406900  |
| C | 11.76493500 | 3.93426200  | 9.62296600  |
| H | 11.11219800 | 3.55619700  | 10.41434400 |
| C | 12.28851800 | 5.30307400  | 10.07080800 |
| H | 12.96054600 | 5.76734000  | 9.34140500  |
| H | 11.44980600 | 5.98815200  | 10.23061100 |
| C | 10.91996400 | 4.00765000  | 8.35791000  |
| C | 9.77221000  | 3.21847600  | 8.22184300  |
| C | 8.96750400  | 3.26608500  | 7.08623000  |
| H | 8.06542500  | 2.66326700  | 7.01428900  |
| C | 9.32622900  | 4.13902300  | 6.06124900  |

|   |             |             |             |
|---|-------------|-------------|-------------|
| C | 10.46314600 | 4.95221600  | 6.14098100  |
| C | 11.24620100 | 4.85041400  | 7.29281400  |
| H | 12.13580500 | 5.47170600  | 7.37216800  |
| O | 8.48269000  | 4.31663900  | 4.97004200  |
| O | 9.89457200  | 4.61694600  | 2.65444700  |
| O | 14.34919800 | 3.45819200  | 1.24477500  |
| O | 16.47940400 | 2.23767300  | 2.43802900  |
| O | 17.37116100 | 0.37849500  | 6.79304100  |
| O | 15.97234400 | 0.10552200  | 9.12117200  |
| O | 11.51688300 | 1.26466600  | 10.53390600 |
| O | 9.38016900  | 2.45741400  | 9.32292500  |
| C | 8.61243500  | -3.73675900 | 9.20817400  |
| C | 7.52460200  | -3.12494500 | 8.59344700  |
| C | 6.12488600  | -0.32086700 | 2.15541500  |
| C | 6.84455800  | -0.15894700 | 0.95744300  |
| C | 13.47892200 | -1.88203100 | -1.14506800 |
| C | 14.56915700 | -2.51469900 | -0.52004400 |
| C | 15.81102600 | -5.27995500 | 5.96981200  |
| C | 15.09621100 | -5.42300600 | 7.15532300  |
| H | 12.84027500 | 5.20149500  | 11.01080000 |
| H | 17.95959400 | 4.29486800  | 8.16961900  |
| H | 15.72898000 | 6.81831100  | 3.30931100  |
| H | 10.61355100 | 7.72549600  | 6.15158600  |
| H | 5.39231900  | -1.12215400 | 2.21574800  |
| H | 6.64338900  | -0.84156800 | 0.13553200  |
| H | 12.87274600 | -2.45933200 | -1.83882600 |
| H | 14.76683400 | -3.55793600 | -0.75438000 |
| H | 15.93571100 | -6.14594300 | 5.32604500  |
| H | 14.69643300 | -6.40218700 | 7.40227000  |
| H | 8.59665600  | -4.81554700 | 9.33269300  |
| H | 6.70110600  | -3.74411200 | 8.24939200  |
| N | 13.69942900 | 1.45923800  | 0.30363300  |
| N | 15.86432200 | 0.21426000  | 1.52742600  |
| N | 16.78843100 | -1.75899300 | 6.16653000  |
| N | 15.38229000 | -2.04080800 | 8.54312200  |
| N | 10.66684800 | -0.81425800 | 10.03893900 |
| N | 8.50283300  | 0.39642900  | 8.79178600  |
| N | 7.52593900  | 2.38181900  | 4.16807700  |
| N | 8.95819500  | 2.69180000  | 1.80439100  |
| C | 7.90195900  | 0.73451200  | 0.85103500  |
| C | 6.42200500  | 0.41250400  | 3.29607900  |
| C | 13.06511800 | -0.60654700 | -0.78532300 |
| C | 15.30177900 | -1.89522300 | 0.48311600  |
| C | 16.27102800 | -4.03287000 | 5.52931700  |
| C | 14.81104500 | -4.33287800 | 7.99473800  |
| C | 9.75581700  | -3.01776300 | 9.59706200  |
| C | 7.51331700  | -1.75458500 | 8.30324900  |
| C | 6.34602600  | -1.50775500 | 4.81347200  |
| C | 6.14790000  | -0.12443600 | 4.65060900  |
| C | 5.97852000  | 0.64754700  | 5.81837300  |
| C | 6.25976000  | 0.11303500  | 7.06932100  |
| C | 6.70027000  | -1.22144300 | 7.19991100  |
| C | 6.61009900  | -2.04796000 | 6.06142500  |
| H | 6.44953700  | -2.14237300 | 3.93785900  |
| H | 5.71119200  | 1.69458800  | 5.73890700  |
| H | 6.20338200  | 0.75121300  | 7.94311300  |
| H | 6.91091200  | -3.09001900 | 6.12394600  |
| C | 10.70022200 | -1.18735700 | -0.62289700 |
| C | 11.64544000 | -0.19184600 | -0.92295900 |
| C | 11.17716600 | 1.13086900  | -1.02852800 |
| C | 9.88776800  | 1.46573200  | -0.61965500 |
| C | 9.02334100  | 0.48913100  | -0.09150000 |

|   |             |             |             |
|---|-------------|-------------|-------------|
| C | 9.41687000  | -0.85412800 | -0.21589400 |
| H | 11.01595800 | -2.22475900 | -0.55205200 |
| H | 11.85057600 | 1.91872400  | -1.34632400 |
| H | 9.58586100  | 2.50688000  | -0.62844700 |
| H | 8.76930500  | -1.64152000 | 0.16053300  |
| C | 15.56721200 | -4.37649900 | 3.22343000  |
| C | 16.48950100 | -3.76816500 | 4.09869200  |
| C | 17.32838400 | -2.76753800 | 3.56357500  |
| C | 17.08932600 | -2.24285100 | 2.29958300  |
| C | 15.99146500 | -2.68361300 | 1.53270800  |
| C | 15.32027700 | -3.83989000 | 1.97027300  |
| H | 14.92171600 | -5.17209000 | 3.58488200  |
| H | 18.12704200 | -2.35291700 | 4.16699600  |
| H | 17.70394200 | -1.42532900 | 1.94176800  |
| H | 14.48818100 | -4.22978600 | 1.39082400  |
| C | 12.54841800 | -5.14285700 | 8.49450600  |
| C | 13.66451600 | -4.35494300 | 8.89142400  |
| C | 13.45893400 | -3.46563900 | 9.98485200  |
| C | 12.18457400 | -3.13395100 | 10.38904900 |
| C | 11.04828200 | -3.67453500 | 9.72158900  |
| C | 11.27637900 | -4.81232700 | 8.89833900  |
| H | 12.66510700 | -5.89992300 | 7.72594200  |
| H | 12.04754100 | -2.40790600 | 11.17983900 |
| H | 14.30911100 | -2.99656900 | 10.46278500 |
| H | 10.43891700 | -5.32145500 | 8.43260100  |

## 1 (Phenyl Rotation Transition State)

|                                              |             |            |            |
|----------------------------------------------|-------------|------------|------------|
| Zero-point correction=                       |             |            | 1.159183   |
| (Hartree/Particle)                           |             |            |            |
| Thermal correction to Energy=                |             | 1.227920   |            |
| Thermal correction to Enthalpy=              |             | 1.228864   |            |
| Thermal correction to Gibbs Free Energy=     |             | 1.070302   |            |
| Sum of electronic and zero-point Energies=   |             |            | -          |
| 4415.801400                                  |             |            |            |
| Sum of electronic and thermal Energies=      |             |            | -          |
| 4415.732663                                  |             |            |            |
| Sum of electronic and thermal Enthalpies=    |             |            | -          |
| 4415.731719                                  |             |            |            |
| Sum of electronic and thermal Free Energies= |             |            | -          |
| 4415.890281                                  |             |            |            |
| C                                            | 8.49860400  | 3.23616700 | 3.92432900 |
| C                                            | 7.52485600  | 1.38879200 | 3.01137800 |
| C                                            | 8.23642900  | 1.59548600 | 1.79819300 |
| C                                            | 9.21702900  | 3.45104100 | 2.70341700 |
| C                                            | 10.80703400 | 5.88149200 | 4.98976500 |
| H                                            | 9.87616900  | 6.04838400 | 4.44080400 |
| C                                            | 11.30002700 | 7.24313700 | 5.49043200 |
| H                                            | 12.24137700 | 7.18260200 | 6.04687300 |
| H                                            | 11.46148100 | 7.91515300 | 4.64160500 |
| C                                            | 11.77626200 | 5.22547800 | 4.01479800 |
| C                                            | 11.31565800 | 4.55987700 | 2.87333500 |
| C                                            | 12.18108200 | 3.95785700 | 1.96649100 |
| H                                            | 11.80017600 | 3.46323400 | 1.07639100 |
| C                                            | 13.54903500 | 4.03416800 | 2.20633900 |
| C                                            | 14.07161300 | 4.68713000 | 3.32892800 |
| C                                            | 13.15772700 | 5.25276100 | 4.22066500 |
| H                                            | 13.54030400 | 5.74918600 | 5.11035700 |
| C                                            | 14.57917300 | 2.18960800 | 1.10552700 |

|   |             |             |             |   |             |              |             |
|---|-------------|-------------|-------------|---|-------------|--------------|-------------|
| C | 14.08241600 | 0.22913200  | 0.04309900  | C | 13.94125700 | -1.64556800  | -1.42576000 |
| C | 15.18231000 | -0.38923000 | 0.69724600  | C | 15.01155800 | -2.28532900  | -0.73794600 |
| C | 15.67800000 | 1.55732900  | 1.77066300  | C | 16.39597200 | -5.24067800  | 6.18067500  |
| C | 15.57475500 | 4.76284900  | 3.56116400  | C | 15.71070100 | -5.42279400  | 7.41569000  |
| H | 16.04896000 | 4.60009800  | 2.58941200  | H | 12.74050300 | 5.17672300   | 11.05483100 |
| C | 16.02683800 | 6.13378900  | 4.07484400  | H | 17.93398700 | 4.40816800   | 8.26336700  |
| H | 15.59191900 | 6.39543800  | 5.04542800  | H | 15.73645600 | 6.91284700   | 3.36266000  |
| H | 17.11594800 | 6.15027100  | 4.18505200  | H | 10.55187300 | 7.69072800   | 6.15264900  |
| C | 16.01692300 | 3.61443700  | 4.45802600  | H | 5.31911900  | -0.94212200  | 1.92227600  |
| C | 16.42130100 | 2.39927400  | 3.89306400  | H | 6.42083800  | -0.43209100  | -0.20135800 |
| C | 16.83944900 | 1.32164900  | 4.66875400  | H | 13.49902400 | -2.16677200  | -2.27019800 |
| H | 17.17469500 | 0.39676800  | 4.20713000  | H | 15.28471500 | -3.29367100  | -1.03963700 |
| C | 16.85485000 | 1.47770700  | 6.05197000  | H | 16.60880900 | -6.12026100  | 5.57784600  |
| C | 16.46139000 | 2.66808200  | 6.67450700  | H | 15.50106300 | -6.44049200  | 7.73310900  |
| C | 16.03342800 | 3.71237800  | 5.85131700  | H | 8.45361900  | -4.76930300  | 9.95739000  |
| H | 15.71849000 | 4.64602600  | 6.31294400  | H | 6.65364400  | -3.79855500  | 8.61633100  |
| C | 16.73674100 | -0.69991400 | 7.05505100  | N | 13.78409900 | 1.53228500   | 0.31467100  |
| C | 16.35122200 | -2.88398800 | 6.53835700  | N | 15.93535800 | 0.29541100   | 1.60516300  |
| C | 15.62436500 | -3.06162700 | 7.74680300  | N | 16.85393000 | -1.66401000  | 6.19316700  |
| C | 16.01568700 | -0.87502800 | 8.27950000  | N | 15.43895200 | -1.99973700  | 8.58284700  |
| C | 16.50196800 | 2.78563400  | 8.19233600  | N | 10.78249000 | -0.91493100  | 9.98682400  |
| H | 17.24027400 | 2.05903600  | 8.54246500  | N | 8.63592000  | 0.25401300   | 8.64206600  |
| C | 16.94768500 | 4.16995900  | 8.67449800  | N | 7.72590200  | 2.20327100   | 4.08195300  |
| H | 16.26287800 | 4.97106200  | 8.37658700  | N | 9.12526300  | 2.62346300   | 1.70530900  |
| H | 17.01319400 | 4.18103000  | 9.76721100  | C | 8.01271000  | 0.71952400   | 0.67092300  |
| C | 15.16241000 | 2.35999200  | 8.77873300  | C | 6.61282900  | 0.28077900   | 3.12188200  |
| C | 14.94958200 | 1.04376100  | 9.20511500  | C | 13.30417300 | -0.52871000  | -0.90771000 |
| C | 13.73898200 | 0.63080200  | 9.75152200  | C | 15.50760800 | -1.75790100  | 0.43325000  |
| H | 13.60523400 | -0.39193600 | 10.09544200 | C | 16.55005000 | -3.98260300  | 5.64278100  |
| C | 12.71778700 | 1.56594600  | 9.87982300  | C | 15.10250500 | -4.36657100  | 8.07619500  |
| C | 12.86791400 | 2.89549200  | 9.47009500  | C | 9.81566900  | -3.12898700  | 9.68183400  |
| C | 14.09611700 | 3.25249500  | 8.90831300  | C | 7.63982200  | -1.92187800  | 8.27830300  |
| H | 14.23315500 | 4.27700700  | 8.56848100  | C | 6.96315900  | -1.75569600  | 4.53984400  |
| C | 10.65694700 | 0.37588000  | 9.89971200  | C | 6.50532200  | -0.38826800  | 4.42484300  |
| C | 9.77720200  | -1.69591400 | 9.50223900  | C | 6.20608800  | 0.32175900   | 5.60504800  |
| C | 8.68459400  | -1.09345200 | 8.82091600  | C | 6.45511800  | -0.21460700  | 6.85950800  |
| C | 9.55492100  | 0.97728400  | 9.20896100  | C | 7.01839300  | -1.49696800  | 7.01693800  |
| C | 11.73383800 | 3.90074200  | 9.62501800  | C | 7.21766900  | -2.31226100  | 5.83847600  |
| H | 11.06612300 | 3.50320100  | 10.39438200 | H | 5.79890200  | 1.32258800   | 5.52341100  |
| C | 12.21920900 | 5.27514600  | 10.09736100 | H | 6.24138100  | 0.37383700   | 7.74392300  |
| H | 12.90892400 | 5.75347500  | 9.39388600  | C | 10.90189600 | -1.32755800  | -0.70297800 |
| H | 11.36512400 | 5.94665000  | 10.23237300 | C | 11.83594000 | -0.26130500  | -1.01577200 |
| C | 10.92370700 | 3.96633900  | 8.33686100  | C | 11.32786300 | 1.02121800   | -1.13357000 |
| C | 9.82279000  | 3.12144600  | 8.15832900  | C | 10.01438400 | 1.34177600   | -0.72816000 |
| C | 9.04495900  | 3.14314000  | 7.00510700  | C | 9.14344900  | 0.38325000   | -0.23633600 |
| H | 8.17516700  | 2.49965200  | 6.90410600  | C | 9.54438000  | -1.00948800  | -0.34846800 |
| C | 9.39102700  | 4.04358300  | 6.00283700  | H | 11.98713000 | 1.82917700   | -1.42949300 |
| C | 10.47976700 | 4.91441200  | 6.11993500  | H | 9.71908100  | 2.38480100   | -0.71689400 |
| C | 11.23400500 | 4.84295600  | 7.29386700  | C | 15.10995200 | -3.52363100  | 3.72941700  |
| H | 12.08550700 | 5.51053700  | 7.40740200  | C | 16.47171800 | -3.65017400  | 4.18702700  |
| O | 8.57680100  | 4.18755500  | 4.88404100  | C | 17.50156600 | -3.28877900  | 3.35189900  |
| O | 9.95133300  | 4.58695500  | 2.59071700  | C | 17.24363800 | -2.73903800  | 2.06363000  |
| O | 14.43336000 | 3.53481100  | 1.25793800  | C | 15.95733300 | -2.55330100  | 1.61687900  |
| O | 16.51140600 | 2.33766100  | 2.50796300  | C | 14.85224100 | -2.97465500  | 2.44224800  |
| O | 17.38443000 | 0.47889800  | 6.85979500  | H | 18.52848500 | -3.35985400  | 3.69979000  |
| O | 16.01684700 | 0.15480700  | 9.17019100  | H | 18.07935200 | -2.40230200  | 1.45630800  |
| O | 11.53895600 | 1.19670800  | 10.52451300 | C | 12.67863800 | -5.111753300 | 8.17377800  |
| O | 9.44700000  | 2.32643300  | 9.23647600  | C | 13.80348400 | -4.45950000  | 8.81291100  |
| C | 8.57276600  | -3.75431000 | 9.59151100  | C | 13.54745500 | -3.71460200  | 9.95149000  |
| C | 7.51964500  | -3.18364300 | 8.84955400  | C | 12.23231600 | -3.39067400  | 10.34937800 |
| C | 6.13619800  | -0.22465100 | 1.91755100  | C | 11.12288900 | -3.84018400  | 9.65213000  |
| C | 6.79451900  | 0.04184300  | 0.70081500  | C | 11.33892600 | -4.83716900  | 8.61669000  |

|   |             |             |             |
|---|-------------|-------------|-------------|
| H | 12.09925000 | -2.69347800 | 11.16888400 |
| H | 14.37379900 | -3.26304600 | 10.48842400 |
| C | 7.81967400  | -3.59187600 | 5.90552200  |
| H | 8.12238100  | -3.99429500 | 6.86192600  |
| C | 7.33421500  | -2.51875900 | 3.40648100  |
| H | 7.26200600  | -2.08402700 | 2.41933800  |
| C | 7.85712700  | -3.79851900 | 3.51092800  |
| H | 8.12185500  | -4.34562300 | 2.61108100  |
| C | 8.10124100  | -4.34123600 | 4.77362300  |
| H | 8.55946100  | -5.32012700 | 4.87825500  |
| C | 11.27930800 | -2.70266800 | -0.68522400 |
| H | 12.30102800 | -2.98080100 | -0.89270000 |
| C | 8.66876100  | -2.09609600 | -0.06482600 |
| H | 7.63312100  | -1.90729700 | 0.16994900  |
| C | 9.06259000  | -3.41277500 | -0.11297600 |
| H | 8.33843900  | -4.20039900 | 0.07951200  |
| C | 10.40013300 | -3.72225800 | -0.41141000 |
| H | 10.74371000 | -4.75254300 | -0.42575800 |
| C | 13.49525500 | -2.81019200 | 2.03662400  |
| H | 13.27454700 | -2.37124200 | 1.07084300  |
| C | 13.99789700 | -3.88050600 | 4.54727800  |
| H | 14.16951300 | -4.27644100 | 5.54117200  |
| C | 12.70073500 | -3.73026900 | 4.11724800  |
| H | 11.87904900 | -4.02517700 | 4.76725600  |
| C | 12.44509500 | -3.18612800 | 2.84044400  |
| H | 11.42305900 | -3.05445500 | 2.49005000  |
| C | 12.83207200 | -6.01389200 | 7.07527900  |
| H | 13.81560200 | -6.21094600 | 6.67746600  |
| C | 10.27520700 | -5.52142600 | 7.96273800  |
| H | 9.25778700  | -5.37018700 | 8.28680200  |
| C | 11.77735900 | -6.65748400 | 6.47455000  |
| H | 11.95812600 | -7.33940400 | 5.64867300  |
| C | 10.47338700 | -6.41941300 | 6.94037400  |
| H | 9.62283200  | -6.93641400 | 6.50314000  |

## Cavitand (Vase Form)

|                                              |             |            |             |
|----------------------------------------------|-------------|------------|-------------|
| Zero-point correction=                       |             |            | 0.919067    |
| (Hartree/Particle)                           |             |            |             |
| Thermal correction to Energy=                |             | 0.976738   |             |
| Thermal correction to Enthalpy=              |             | 0.977682   |             |
| Thermal correction to Gibbs Free Energy=     |             | 0.827868   |             |
| Sum of electronic and zero-point Energies=   |             | -          | 3497.816275 |
| Sum of electronic and thermal Energies=      |             | -          | 3497.758604 |
| Sum of electronic and thermal Enthalpies=    |             | -          | 3497.757660 |
| Sum of electronic and thermal Free Energies= |             | -          | 3497.907474 |
| C                                            | 8.58280500  | 3.06192500 | 4.18250900  |
| C                                            | 8.22770400  | 0.86868700 | 3.69184900  |
| C                                            | 8.97161800  | 1.01087500 | 2.48974500  |
| C                                            | 9.33364500  | 3.20693100 | 2.96274300  |
| C                                            | 10.73977300 | 5.87032200 | 4.98757600  |
| H                                            | 9.80568400  | 6.00493500 | 4.43392500  |
| C                                            | 11.21213900 | 7.25512800 | 5.44631600  |
| H                                            | 12.14836600 | 7.21934300 | 6.01464300  |
| H                                            | 11.37795200 | 7.90187300 | 4.57845300  |
| C                                            | 11.71729700 | 5.22153000 | 4.01489800  |
| C                                            | 11.24467700 | 4.53768900 | 2.88833800  |
| C                                            | 12.10228000 | 3.98245600 | 1.94772200  |

|   |             |             |             |
|---|-------------|-------------|-------------|
| H | 11.71121400 | 3.46537400  | 1.07806200  |
| C | 13.47340800 | 4.08756900  | 2.15205000  |
| C | 14.01007300 | 4.73066500  | 3.27366100  |
| C | 13.10342800 | 5.28690400  | 4.18236700  |
| H | 13.49655700 | 5.79078900  | 5.06402700  |
| C | 14.37278000 | 2.19195800  | 1.13811700  |
| C | 13.55537300 | 0.16932600  | 0.49907900  |
| C | 14.58162600 | -0.48449400 | 1.23254400  |
| C | 15.43952500 | 1.52957600  | 1.84436400  |
| C | 15.51767100 | 4.79570300  | 3.48972600  |
| H | 15.97697400 | 4.62538000  | 2.51141200  |
| C | 15.98254400 | 6.16688100  | 3.99117200  |
| H | 15.56051700 | 6.43149400  | 4.96718300  |
| H | 17.07312200 | 6.18162300  | 4.08873000  |
| C | 15.98007800 | 3.65172300  | 4.38604600  |
| C | 16.37182900 | 2.43312400  | 3.81849400  |
| C | 16.81031200 | 1.36307800  | 4.58767100  |
| H | 17.11818000 | 0.43257100  | 4.12285300  |
| C | 16.84457000 | 1.51332500  | 5.96933800  |
| C | 16.45853400 | 2.70147300  | 6.60087400  |
| C | 16.02687100 | 3.74858700  | 5.77959700  |
| H | 15.71475400 | 4.68069400  | 6.24753100  |
| C | 16.53875900 | -0.63742700 | 6.86591300  |
| C | 15.68366900 | -2.60594300 | 6.11630500  |
| C | 14.95044400 | -2.75452800 | 7.32426800  |
| C | 15.79449500 | -0.78777200 | 8.09024300  |
| C | 16.50542500 | 2.81785700  | 8.12068400  |
| H | 17.22187000 | 2.06596400  | 8.46467800  |
| C | 17.00413400 | 4.18737000  | 8.59337500  |
| H | 16.34555800 | 5.01015100  | 8.29343200  |
| H | 17.07471800 | 4.20424500  | 9.68592200  |
| C | 15.16032200 | 2.43920200  | 8.73121800  |
| C | 14.91394700 | 1.12249300  | 9.13709400  |
| C | 13.69960000 | 0.73148100  | 9.68952800  |
| H | 13.53505000 | -0.29522000 | 9.99844000  |
| C | 12.70327800 | 1.68796400  | 9.83484900  |
| C | 12.88792000 | 3.02419800  | 9.45942000  |
| C | 14.12428700 | 3.36366700  | 8.90286300  |
| H | 14.28950700 | 4.39333900  | 8.59027800  |
| C | 10.63099200 | 0.55731600  | 9.72270500  |
| C | 9.91247700  | -1.42346500 | 8.86950200  |
| C | 8.71546300  | -0.80265100 | 8.42204900  |
| C | 9.43933400  | 1.19684900  | 9.22596300  |
| C | 11.76067900 | 4.03226100  | 9.65614200  |
| H | 11.13387100 | 3.63990100  | 10.46247800 |
| C | 12.26762200 | 5.41218500  | 10.08811400 |
| H | 12.89721100 | 5.89305900  | 9.33108600  |
| H | 11.42070900 | 6.07843300  | 10.28195300 |
| C | 10.87532300 | 4.09540200  | 8.41693300  |
| C | 9.70706500  | 3.32927300  | 8.32970800  |
| C | 8.89931000  | 3.34246800  | 7.19819200  |
| H | 8.00706600  | 2.72749300  | 7.14912400  |
| C | 9.26758700  | 4.14481000  | 6.12613400  |
| C | 10.40675800 | 4.95795000  | 6.16199800  |
| C | 11.19303100 | 4.89810900  | 7.31608200  |
| H | 12.09877400 | 5.50117500  | 7.35858500  |
| O | 8.47148900  | 4.16099400  | 4.98309800  |
| O | 9.86845000  | 4.43404800  | 2.70063100  |
| O | 14.33811800 | 3.55374500  | 1.19780400  |
| O | 16.36810600 | 2.33039100  | 2.43233100  |
| O | 17.32423600 | 0.46913500  | 6.75467300  |
| O | 15.94169100 | 0.19077500  | 9.02522700  |

|   |             |             |             |
|---|-------------|-------------|-------------|
| O | 11.49365700 | 1.34009200  | 10.42435100 |
| O | 9.32771300  | 2.54267400  | 9.41653200  |
| C | 9.15015500  | -3.53212700 | 7.96882100  |
| C | 7.95031200  | -2.91701800 | 7.53718000  |
| C | 7.89292100  | -1.47324100 | 3.20488500  |
| C | 8.63537200  | -1.33185600 | 2.00753500  |
| C | 12.66263600 | -1.97635000 | -0.16289900 |
| C | 13.67651700 | -2.62780400 | 0.58006800  |
| C | 14.78140300 | -4.69920300 | 5.31483800  |
| C | 14.05126500 | -4.84732300 | 6.51866600  |
| H | 12.86147900 | 5.32497100  | 11.00399600 |
| H | 17.99547900 | 4.39054100  | 8.17518500  |
| H | 15.68380400 | 6.94596300  | 3.28228200  |
| H | 10.45453700 | 7.71655500  | 6.08823400  |
| H | 7.48678800  | -2.44542100 | 3.47175500  |
| H | 8.79135200  | -2.19707300 | 1.36851300  |
| H | 11.93073900 | -2.56979700 | -0.70463700 |
| H | 13.70763500 | -3.71383100 | 0.60411600  |
| H | 14.70633000 | -5.46402500 | 4.54643300  |
| H | 13.42486300 | -5.72412000 | 6.65965200  |
| H | 9.30528600  | -4.59133300 | 7.78165700  |
| H | 7.19620300  | -3.51236100 | 7.02899900  |
| N | 13.46934800 | 1.53725800  | 0.47824500  |
| N | 15.53641600 | 0.23791200  | 1.90077600  |
| N | 16.48595700 | -1.51329000 | 5.91140700  |
| N | 15.02705600 | -1.80854400 | 8.31340400  |
| N | 10.86721600 | -0.70462800 | 9.54163100  |
| N | 8.50784900  | 0.53927000  | 8.60940800  |
| N | 8.04562600  | 1.93488400  | 4.53276600  |
| N | 9.51959000  | 2.21823600  | 2.14454000  |
| C | 9.16657600  | -0.11201900 | 1.65284200  |
| C | 7.69039900  | -0.39340100 | 4.03479200  |
| C | 12.60133300 | -0.60096100 | -0.20528500 |
| C | 14.62208900 | -1.89752000 | 1.26515700  |
| C | 15.58459400 | -3.59862300 | 5.11415200  |
| C | 14.13231800 | -3.89297900 | 7.50825300  |
| C | 10.11527600 | -2.80143900 | 8.62569500  |
| C | 7.73351100  | -1.57513600 | 7.75973200  |
| H | 11.83990000 | -0.07030000 | -0.77056300 |
| H | 15.41402300 | -2.36867300 | 1.84065000  |
| H | 9.75132800  | 0.02482400  | 0.74795200  |
| H | 7.13668100  | -0.47308400 | 4.96556900  |
| H | 16.16172600 | -3.45899900 | 4.20419100  |
| H | 13.58952000 | -3.98042100 | 8.44547400  |
| H | 6.82172500  | -1.07387500 | 7.44627100  |
| H | 11.04416100 | -3.24603200 | 8.97183500  |

## Cavitand (Kite Form)

|                                            |          |
|--------------------------------------------|----------|
| Zero-point correction=                     | 0.918730 |
| (Hartree/Particle)                         |          |
| Thermal correction to Energy=              | 0.976469 |
| Thermal correction to Enthalpy=            | 0.977413 |
| Thermal correction to Gibbs Free Energy=   | 0.828386 |
| Sum of electronic and zero-point Energies= | -        |
| 3497.811242                                |          |
| Sum of electronic and thermal Energies=    | -        |
| 3497.753503                                |          |
| Sum of electronic and thermal Enthalpies=  | -        |
| 3497.752559                                |          |

|                                              |             |             |             |
|----------------------------------------------|-------------|-------------|-------------|
| Sum of electronic and thermal Free Energies= | -           |             |             |
| 3497.901585                                  |             |             |             |
| C                                            | 8.89874700  | 4.36298500  | 4.65115300  |
| C                                            | 6.64818900  | 4.45625500  | 5.01337200  |
| C                                            | 6.52761000  | 5.43858100  | 3.99643700  |
| C                                            | 8.78995900  | 5.40858700  | 3.65937700  |
| C                                            | 10.95334500 | 6.31925300  | 5.79823200  |
| H                                            | 9.90484800  | 6.47380000  | 5.51238300  |
| C                                            | 11.40484600 | 7.61424000  | 6.47836000  |
| H                                            | 12.45577400 | 7.56706900  | 6.78651800  |
| H                                            | 11.29784100 | 8.45284300  | 5.78407900  |
| C                                            | 11.76250600 | 6.03874100  | 4.53792500  |
| C                                            | 11.19408700 | 5.79984000  | 3.28185600  |
| C                                            | 11.99220100 | 5.50190600  | 2.18263300  |
| H                                            | 11.53383200 | 5.33000800  | 1.21457000  |
| C                                            | 13.37293600 | 5.40950500  | 2.31970500  |
| C                                            | 13.98846900 | 5.63984500  | 3.55492400  |
| C                                            | 13.14947100 | 5.92166500  | 4.63334100  |
| H                                            | 13.60328800 | 6.01913000  | 5.62119100  |
| C                                            | 15.04419900 | 4.28592000  | 0.89941700  |
| C                                            | 16.72156700 | 3.60586400  | -0.49974800 |
| C                                            | 17.08297900 | 2.57497400  | 0.40574500  |
| C                                            | 15.37864100 | 3.19699800  | 1.78887300  |
| C                                            | 15.48695500 | 5.50607500  | 3.79558100  |
| H                                            | 15.98647300 | 5.38303800  | 2.82586100  |
| C                                            | 16.07128300 | 6.77705500  | 4.41738300  |
| H                                            | 15.61803100 | 6.99955100  | 5.39038200  |
| H                                            | 17.15341700 | 6.67994100  | 4.55962000  |
| C                                            | 15.72586800 | 4.24728400  | 4.61998900  |
| C                                            | 15.25897400 | 3.02392200  | 4.12328700  |
| C                                            | 15.35947700 | 1.84252800  | 4.84312900  |
| H                                            | 14.99377900 | 0.90718900  | 4.43492100  |
| C                                            | 15.93363700 | 1.89559000  | 6.10462800  |
| C                                            | 16.41966300 | 3.08656200  | 6.65832300  |
| C                                            | 16.31186900 | 4.24890700  | 5.88915000  |
| H                                            | 16.67524200 | 5.18695600  | 6.29974700  |
| C                                            | 17.18184100 | 0.17492200  | 7.09424900  |
| C                                            | 19.09632000 | -0.80883900 | 6.33786200  |
| C                                            | 19.49371300 | -1.05960000 | 7.67678800  |
| C                                            | 17.61155000 | -0.02187400 | 8.46002800  |
| C                                            | 16.94635800 | 3.06212500  | 8.08778200  |
| H                                            | 17.78993700 | 2.36113500  | 8.13250700  |
| C                                            | 17.48540100 | 4.40946700  | 8.57511100  |
| H                                            | 16.70552100 | 5.17974000  | 8.58585000  |
| H                                            | 17.86795900 | 4.30734300  | 9.59489000  |
| C                                            | 15.83728200 | 2.54296500  | 8.99427200  |
| C                                            | 15.84163300 | 1.27387200  | 9.58353500  |
| C                                            | 14.77168200 | 0.84463600  | 10.36104800 |
| H                                            | 14.79782000 | -0.13870100 | 10.81839100 |
| C                                            | 13.66247500 | 1.66298600  | 10.54498400 |
| C                                            | 13.61102000 | 2.94063900  | 9.97679500  |
| C                                            | 14.69923700 | 3.32505500  | 9.19285700  |
| H                                            | 14.64007600 | 4.28207100  | 8.67137700  |
| C                                            | 11.36059700 | 1.09867900  | 11.22208000 |
| C                                            | 9.30996700  | 0.76976800  | 12.18094500 |
| C                                            | 8.66744200  | 1.06725900  | 10.95116800 |
| C                                            | 10.70317700 | 1.33824500  | 9.95751200  |
| C                                            | 12.41208700 | 3.87391500  | 10.09066300 |
| H                                            | 11.70850000 | 3.45022800  | 10.81903600 |
| C                                            | 12.81790300 | 5.24473400  | 10.63802000 |
| H                                            | 13.54191900 | 5.74560800  | 9.98490400  |
| H                                            | 11.94401100 | 5.89754800  | 10.74209600 |

|   |             |             |             |
|---|-------------|-------------|-------------|
| C | 11.72107300 | 3.92890100  | 8.73382900  |
| C | 11.27823000 | 2.73039500  | 8.16052600  |
| C | 10.71378100 | 2.67593500  | 6.89469900  |
| H | 10.37492600 | 1.73586600  | 6.47437200  |
| C | 10.60429400 | 3.85920800  | 6.17924300  |
| C | 11.02818700 | 5.09009600  | 6.69539300  |
| C | 11.57539900 | 5.09835700  | 7.98179200  |
| H | 11.91821200 | 6.04000600  | 8.40173800  |
| O | 10.12897000 | 3.82260100  | 4.87517000  |
| O | 9.84676700  | 5.93579700  | 2.99643200  |
| O | 14.05660200 | 5.18146400  | 1.13814000  |
| O | 14.60708200 | 3.01837500  | 2.89728800  |
| O | 15.96371500 | 5.074791000 | 6.88542400  |
| O | 16.91283600 | 0.39853600  | 9.54139700  |
| O | 12.70232300 | 1.14974300  | 11.39930000 |
| O | 11.48546600 | 1.55062200  | 8.86272900  |
| C | 7.15171600  | 0.44205000  | 13.21622200 |
| C | 6.51274600  | 0.74416700  | 11.98929400 |
| C | 4.26277400  | 4.52464500  | 5.37384100  |
| C | 4.13929000  | 5.50127500  | 4.35606400  |
| C | 18.50402400 | 2.91581800  | -1.97782800 |
| C | 18.86496200 | 1.89020700  | -1.07076700 |
| C | 21.10252500 | -1.88178400 | 5.53249900  |
| C | 21.49887600 | -2.13749000 | 6.86759600  |
| H | 13.28135400 | 5.12718700  | 11.62195200 |
| H | 18.30098300 | 4.75905900  | 7.93223300  |
| H | 15.88392400 | 7.63025600  | 3.75883600  |
| H | 10.79791000 | 7.82025300  | 7.36710700  |
| H | 3.37434400  | 4.18142600  | 5.89715900  |
| H | 3.15688100  | 5.89661700  | 4.11151800  |
| H | 19.06577400 | 3.03480000  | -2.90060300 |
| H | 19.69782900 | 1.23386100  | -1.30848400 |
| H | 21.73805100 | -2.20796000 | 4.71354400  |
| H | 22.43504900 | -2.65614800 | 7.05678900  |
| H | 6.54840600  | 0.19975200  | 14.08716000 |
| H | 5.42759400  | 0.72900500  | 11.93283700 |
| N | 15.69558900 | 4.46197000  | -0.21164500 |
| N | 16.37128500 | 2.39803700  | 1.56122500  |
| N | 17.90827100 | -0.17897000 | 6.08298500  |
| N | 18.72693500 | -0.63432800 | 8.72532400  |
| N | 10.67215500 | 0.81032800  | 12.28620700 |
| N | 9.41421000  | 1.34919500  | 9.83931800  |
| N | 7.87531000  | 3.93055500  | 5.31530700  |
| N | 7.63256700  | 5.90864600  | 3.34340500  |
| C | 5.24933000  | 5.95423200  | 3.67785600  |
| C | 5.49716000  | 4.00825300  | 5.70061800  |
| C | 17.45273200 | 3.76173400  | -1.70085700 |
| C | 18.16751600 | 1.72001800  | 0.10466900  |
| C | 19.91999700 | -1.22694500 | 5.26799600  |
| C | 20.71242000 | -1.73413600 | 7.92407500  |
| C | 8.52549600  | 0.45492200  | 13.31536200 |
| C | 7.25627100  | 1.05324700  | 10.87180000 |
| H | 20.99410700 | -1.91311700 | 8.95764500  |
| H | 19.58508300 | -1.01942600 | 4.25575200  |
| H | 6.79730800  | 1.28506300  | 9.91498900  |
| H | 9.04155600  | 0.23174800  | 14.24462400 |
| H | 5.18427800  | 6.70560100  | 2.89627300  |
| H | 5.62548900  | 3.25512100  | 6.47275800  |
| H | 18.41593600 | 0.94097500  | 0.81968400  |
| H | 17.15707500 | 4.55899600  | -2.37658900 |

## [8]CPP

|                                              |             |             |             |
|----------------------------------------------|-------------|-------------|-------------|
| Zero-point correction=                       |             |             | 0.648710    |
| (Hartree/Particle)                           |             |             |             |
| Thermal correction to Energy=                |             | 0.683557    |             |
| Thermal correction to Enthalpy=              |             | 0.684501    |             |
| Thermal correction to Gibbs Free Energy=     |             | 0.583833    |             |
| Sum of electronic and zero-point Energies=   |             |             | -           |
| 1845.437811                                  |             |             |             |
| Sum of electronic and thermal Energies=      |             |             | -           |
| 1845.402965                                  |             |             |             |
| Sum of electronic and thermal Enthalpies=    |             |             | -           |
| 1845.402021                                  |             |             |             |
| Sum of electronic and thermal Free Energies= |             |             | -           |
| 1845.502688                                  |             |             |             |
| C                                            | 0.03983700  | 5.54785400  | -0.05608000 |
| C                                            | 1.50757200  | 5.33940500  | 0.05535700  |
| C                                            | 2.36545600  | 5.36840800  | -1.05782500 |
| C                                            | 3.56326300  | 4.65983200  | -1.05732700 |
| C                                            | 3.95031600  | 3.89426800  | 0.05617000  |
| C                                            | 4.84043100  | 2.70881300  | -0.05530700 |
| C                                            | 4.78412100  | 1.94698800  | -1.23199300 |
| C                                            | 5.13058100  | 0.60082600  | -1.23240500 |
| C                                            | 5.54785000  | -0.03983800 | -0.05612200 |
| C                                            | 5.81544000  | 0.77552800  | 1.05718100  |
| C                                            | 5.46843400  | 2.12333800  | 1.05761700  |
| C                                            | 3.20278300  | 4.05337000  | 1.23264600  |
| C                                            | 2.00648000  | 4.76120400  | 1.23221900  |
| C                                            | -0.60081800 | 5.13060600  | -1.23237700 |
| C                                            | -1.94697900 | 4.78414400  | -1.23198300 |
| C                                            | -2.70881500 | 4.84043700  | -0.05530300 |
| C                                            | -3.89427000 | 3.95031900  | 0.05614800  |
| C                                            | -4.05339400 | 3.20278800  | 1.23262200  |
| C                                            | -4.76122800 | 2.00648600  | 1.23218300  |
| C                                            | -5.33940100 | 1.50757300  | 0.05531000  |
| C                                            | -5.54785000 | 0.03983800  | -0.05612200 |
| C                                            | -5.81544000 | -0.77552800 | 1.05718100  |
| C                                            | -5.46843400 | -2.12333800 | 1.05761700  |
| C                                            | -5.13058000 | -0.60082700 | -1.23240600 |
| C                                            | -4.78412100 | -1.94698800 | -1.23199300 |
| C                                            | -4.84043100 | -2.70881400 | -0.05530700 |
| C                                            | -3.95031600 | -3.89426800 | 0.05617000  |
| C                                            | -3.20278300 | -4.05337000 | 1.23264600  |
| C                                            | -2.00648000 | -4.76120400 | 1.23221900  |
| C                                            | -1.50757200 | -5.33940500 | 0.05535800  |
| C                                            | -0.03983700 | -5.54785400 | -0.05608000 |
| C                                            | 0.77554000  | -5.81542500 | 1.05722100  |
| C                                            | 2.12335000  | -5.46842100 | 1.05763800  |
| C                                            | 2.70881500  | -4.84043700 | -0.05530300 |
| C                                            | 3.89427000  | -3.95032000 | 0.05614900  |
| C                                            | 4.05339400  | -3.20278900 | 1.23262200  |
| C                                            | 4.76122800  | -2.00648600 | 1.23218300  |
| C                                            | 5.33940100  | -1.50757400 | 0.05531000  |
| C                                            | 5.36838000  | -2.36545300 | -1.05787600 |
| C                                            | 4.65980600  | -3.56326200 | -1.05736600 |
| C                                            | 1.94697900  | -4.78414400 | -1.23198200 |
| C                                            | 0.60081800  | -5.13060700 | -1.23237700 |
| C                                            | -2.36545600 | -5.36840800 | -1.05782500 |
| C                                            | -3.56326200 | -4.65983200 | -1.05732700 |
| C                                            | -5.36838000 | 2.36545300  | -1.05787700 |
| C                                            | -4.65980600 | 3.56326100  | -1.05736600 |
| C                                            | -2.12335000 | 5.46842100  | 1.05763700  |

|   |             |             |             |
|---|-------------|-------------|-------------|
| C | -0.77554000 | 5.81542400  | 1.05722000  |
| H | 2.05105800  | 5.88102400  | -1.96493400 |
| H | 4.16447500  | 4.63092600  | -1.96405300 |
| H | 4.31119900  | 2.36558800  | -2.11715300 |
| H | 4.91833300  | 0.00636000  | -2.11782100 |
| H | 6.22084700  | 0.33045200  | 1.96382500  |
| H | 5.60867900  | 2.70839600  | 1.96453600  |
| H | 3.47293700  | 3.48318600  | 2.11826400  |
| H | 1.37627700  | 4.72364800  | 2.11755900  |
| H | -0.00634400 | 4.91837500  | -2.11779200 |
| H | -2.36557200 | 4.31123800  | -2.11715400 |
| H | -3.48323100 | 3.47294800  | 2.11825200  |
| H | -4.72084900 | 1.37628600  | 2.11752600  |
| H | -6.22084700 | -0.33045200 | 1.96382500  |
| H | -5.60867900 | -2.70839600 | 1.96453600  |
| H | -4.91833300 | -0.00636000 | -2.11782200 |
| H | -4.31119900 | -2.36558800 | -2.11715300 |
| H | -3.47293700 | -3.48318600 | 2.11826400  |
| H | -1.37627700 | -4.72364800 | 2.11755900  |
| H | 0.33047200  | -6.22081800 | 1.96387500  |
| H | 2.70841700  | -5.60864900 | 1.96455400  |
| H | 3.48323100  | -3.47294800 | 2.11825300  |
| H | 4.72369300  | -1.37628600 | 2.11752600  |
| H | 5.88097400  | -2.05105100 | -1.96499600 |
| H | 4.63087800  | -4.16447000 | -1.96409400 |
| H | 2.36557200  | -4.31123800 | -2.11715400 |
| H | 0.00634400  | -4.91837600 | -2.11779200 |
| H | -2.05105800 | -5.88102500 | -1.96493400 |
| H | -4.16447500 | -4.63092600 | -1.96405300 |
| H | -5.88097400 | 2.05105000  | -1.96499700 |
| H | -4.63087800 | 4.16447000  | -1.96409400 |
| H | -2.70841700 | 5.60864900  | 1.96455300  |
| H | -0.33047200 | 6.22081800  | 1.96387500  |

## Biphenyl

|                                              |             |             |             |
|----------------------------------------------|-------------|-------------|-------------|
| Zero-point correction=                       | 0.182734    |             |             |
| (Hartree/Particle)                           |             |             |             |
| Thermal correction to Energy=                | 0.191651    |             |             |
| Thermal correction to Enthalpy=              | 0.192595    |             |             |
| Thermal correction to Gibbs Free Energy=     | 0.148222    |             |             |
| Sum of electronic and zero-point Energies=   | -           |             |             |
| 462.542805                                   |             |             |             |
| Sum of electronic and thermal Energies=      | -           |             |             |
| 462.533888                                   |             |             |             |
| Sum of electronic and thermal Enthalpies=    | -           |             |             |
| 462.532943                                   |             |             |             |
| Sum of electronic and thermal Free Energies= | -           |             |             |
| 462.577316                                   |             |             |             |
| C                                            | -0.69309600 | -1.50168300 | -0.13779200 |
| C                                            | 0.69995000  | -1.49885800 | -0.13304600 |
| C                                            | 1.41601600  | -0.30027200 | -0.00242600 |
| C                                            | 0.69572200  | 0.89636900  | 0.12246200  |
| C                                            | -0.69735900 | 0.89551300  | 0.11606200  |
| C                                            | -1.39773100 | -0.30401500 | -0.01364600 |
| H                                            | -1.22946600 | -2.44104000 | -0.24784700 |
| H                                            | 1.24437200  | -2.43255500 | -0.25782600 |
| H                                            | 1.23665000  | 1.83151000  | 0.25159500  |
| H                                            | -1.23709100 | 1.83343000  | 0.22188800  |
| H                                            | -2.48474700 | -0.30546900 | -0.01799500 |
| C                                            | 2.90082200  | -0.29818700 | 0.00352300  |
| C                                            | 3.61986700  | 0.73587200  | -0.61297800 |

|   |            |             |             |
|---|------------|-------------|-------------|
| C | 3.61811100 | -1.33009700 | 0.62564900  |
| C | 5.01295700 | 0.73925800  | -0.60714900 |
| H | 3.07796700 | 1.52952800  | -1.12309700 |
| C | 5.01115600 | -1.32917400 | 0.63081600  |
| H | 3.07461800 | -2.12541800 | 1.13145300  |
| C | 5.71455800 | -0.29388400 | 0.01458800  |
| H | 5.55172600 | 1.54636500  | -1.09755500 |
| H | 5.54851200 | -2.13463600 | 1.12545200  |
| H | 6.80157700 | -0.29227800 | 0.01882600  |

## p-Terphenyl

|                                              |             |             |             |
|----------------------------------------------|-------------|-------------|-------------|
| Zero-point correction=                       | 0.264084    |             |             |
| (Hartree/Particle)                           |             |             |             |
| Thermal correction to Energy=                | 0.277694    |             |             |
| Thermal correction to Enthalpy=              | 0.278638    |             |             |
| Thermal correction to Gibbs Free Energy=     | 0.222715    |             |             |
| Sum of electronic and zero-point Energies=   | -           |             |             |
| 693.236870                                   |             |             |             |
| Sum of electronic and thermal Energies=      | -           |             |             |
| 693.223260                                   |             |             |             |
| Sum of electronic and thermal Enthalpies=    | -           |             |             |
| 693.222316                                   |             |             |             |
| Sum of electronic and thermal Free Energies= | -           |             |             |
| 693.278239                                   |             |             |             |
| C                                            | -2.28664600 | -1.22714600 | 0.00735100  |
| C                                            | -0.88711500 | -1.21041400 | 0.09280800  |
| C                                            | -0.18255600 | -0.01152900 | 0.09007000  |
| C                                            | -0.84931100 | 1.21907500  | 0.00459200  |
| C                                            | -2.24902900 | 1.20245200  | -0.07773800 |
| C                                            | -2.95342700 | 0.00346100  | -0.07777400 |
| C                                            | -3.03793400 | -2.50639000 | 0.00463400  |
| C                                            | -2.52360200 | -3.63908500 | -0.64307600 |
| C                                            | -3.22813900 | -4.84066800 | -0.64755500 |
| C                                            | -4.46318300 | -4.93241700 | -0.00518100 |
| C                                            | -4.98641200 | -3.81286100 | 0.64227200  |
| C                                            | -4.27992200 | -2.61236600 | 0.64759700  |
| H                                            | -0.34715300 | -2.15101100 | 0.17850000  |
| H                                            | 0.90426000  | -0.02669800 | 0.13718000  |
| H                                            | -2.79124300 | 2.14439900  | -0.12620500 |
| H                                            | -4.03795900 | 0.01722600  | -0.16276000 |
| H                                            | -1.57451600 | -3.56538400 | -1.16983000 |
| H                                            | -2.81573300 | -5.70503300 | -1.16226500 |
| H                                            | -5.01396500 | -5.86954700 | -0.00912800 |
| H                                            | -5.94414800 | -3.87642400 | 1.15301200  |
| H                                            | -4.67973800 | -1.75044800 | 1.17764100  |
| C                                            | -0.09749300 | 2.49800100  | -0.00087500 |
| C                                            | 1.05899000  | 2.65563700  | 0.77685400  |
| C                                            | -0.52553200 | 3.57864700  | -0.78579100 |
| C                                            | 1.76630400  | 3.85563200  | 0.76941700  |
| H                                            | 1.38866600  | 1.83608400  | 1.41195100  |
| C                                            | 0.17972900  | 4.77980500  | -0.79265600 |
| H                                            | -1.40497100 | 3.46299300  | -1.41577000 |
| C                                            | 1.32929300  | 4.92317400  | -0.01527800 |
| H                                            | 2.65623900  | 3.96009600  | 1.38525100  |
| H                                            | -0.16429200 | 5.60290000  | -1.41419400 |
| H                                            | 1.88063900  | 5.85996300  | -0.02097700 |

## Benzene

|                               |          |
|-------------------------------|----------|
| Zero-point correction=        | 0.101216 |
| (Hartree/Particle)            |          |
| Thermal correction to Energy= | 0.105635 |



|                                              |             |            |            |             |             |             |             |
|----------------------------------------------|-------------|------------|------------|-------------|-------------|-------------|-------------|
| Thermal correction to Enthalpy=              | 0.106579    |            | C          | 1.02718600  | 0.38212400  | 0.00048000  |             |
| Thermal correction to Gibbs Free Energy=     | 0.073739    |            | C          | 1.72478900  | 1.59031500  | -0.00003400 |             |
| Sum of electronic and zero-point Energies=   | -           |            | C          | 1.02725900  | 2.79866100  | -0.00105000 |             |
| 231.849069                                   |             |            | C          | -0.36784200 | 2.79872500  | -0.00150700 |             |
| Sum of electronic and thermal Energies=      | -           |            | C          | -1.06548900 | 1.59045600  | -0.00092500 |             |
| 231.844650                                   |             |            | H          | -0.91168400 | -0.55948800 | 0.00049000  |             |
| Sum of electronic and thermal Enthalpies=    | -           |            | H          | 1.57076400  | -0.55961400 | 0.00127000  |             |
| 231.843706                                   |             |            | H          | 2.81215100  | 1.59033300  | 0.00031800  |             |
| Sum of electronic and thermal Free Energies= | -           |            | H          | 1.57105900  | 3.74026800  | -0.00146800 |             |
| 231.876547                                   |             |            | H          | -0.91153700 | 3.74039600  | -0.00227900 |             |
| C                                            | -0.36800500 | 0.38218900 | 0.00005600 | H           | -2.15285100 | 1.59057400  | -0.00126000 |

## References

1. Bruker (2015). APEX3. Bruker Analytical X-Ray Systems, Inc.: Madison, Wisconsin, USA.
2. Bruker (2015). SADABS. Bruker Analytical X-Ray Systems, Inc.: Madison, Wisconsin, USA.
3. A. Spek. Single-crystal structure validation with the program PLATON. *J. Appl. Cryst.* **2003**, *36*, 7.
4. A. Spek. Structure validation in chemical crystallography. *Acta Cryst. D* **2009**, *65*, 148.
5. G. M. Sheldrick. SHELXT - Integrated space-group and crystal-structure determination. *Acta Cryst. A* **2015**, *71*, 3.
6. G. M. Sheldrick. Crystal structure refinement with SHELXL. *Acta Cryst. C* **2015**, *71*, 3.
7. O. V. Dolomanov; L. J. Bourhis; R. J. Gildea; J. A. K. Howard; H. Puschmann. OLEX2: a complete structure solution, refinement and analysis program. *J. Appl. Cryst.* **2009**, *42*, 339.
8. N. R. Paisley; C. M. Tonge; E. R. Sauvé; S. V. Halldorson; Z. M. Hudson. Synthesis of polymeric organic semiconductors using semifluorinated polymer precursors. *J. Polym. Sci. A Polym. Chem.* **2018**, *56*, 2183.
9. T. Inouchi; T. Nakashima; M. Toba; T. Kawai. Preparation and Acid-Responsive Photophysical Properties of T-Shaped pi-Conjugated Molecules Containing a Benzimidazole Junction. *Chem. Asian J.* **2011**, *6*, 3020.
10. L. M. Tunstad; J. A. Tucker; E. Dalcanale; J. Weiser; J. A. Bryant; J. C. Sherman; R. C. Helgeson; C. B. Knobler; D. J. Cram. Host-guest complexation. 48. Octol building blocks for cavitands and carcerands. *J. Org. Chem.* **1989**, *54*, 1305.
11. M. J. Frisch; G. W. Trucks; H. B. Schlegel; G. E. Scuseria; M. A. Robb; J. R. Cheeseman; G. Scalmani; V. Barone; G. A. Petersson; H. Nakatsuji; X. Li; M. Caricato; A. V. Marenich; J. Bloino; B. G. Janesko; R. Gomperts; B. Mennucci; H. P. Hratchian; J. V. Ortiz; A. F. Izmaylov; J. L. Sonnenberg; Williams; F. Ding; F. Lipparini; F. Egidi; J. Goings; B. Peng; A. Petrone; T. Henderson; D. Ranasinghe; V. G. Zakrzewski; J. Gao; N. Rega; G. Zheng; W. Liang; M. Hada; M. Ehara; K. Toyota; R. Fukuda; J. Hasegawa; M. Ishida; T. Nakajima; Y. Honda; O. Kitao; H. Nakai; T. Vreven; K. Throssell; J. A. Montgomery Jr.; J. E. Peralta; F. Ogliaro; M. J. Bearpark; J. J. Heyd; E. N. Brothers; K.

- N. Kudin; V. N. Staroverov; T. A. Keith; R. Kobayashi; J. Normand; K. Raghavachari; A. P. Rendell; J. C. Burant; S. S. Iyengar; J. Tomasi; M. Cossi; J. M. Millam; M. Klene; C. Adamo; R. Cammi; J. W. Ochterski; R. L. Martin; K. Morokuma; O. Farkas; J. B. Foresman; D. J. Fox *Gaussian 16 Rev. C.01*, Wallingford, CT, 2016.
12. J.-D. Chai; M. Head-Gordon. Long-range corrected hybrid density functionals with damped atom–atom dispersion corrections. *Phys. Chem. Chem. Phys.* **2008**, *10*, 6615.
  13. Y. Zhao; D. G. Truhlar. The M06 suite of density functionals for main group thermochemistry, thermochemical kinetics, noncovalent interactions, excited states, and transition elements: two new functionals and systematic testing of four M06-class functionals and 12 other functionals. *Theor. Chem. Acc.* **2008**, *120*, 215.
  14. H. S. Yu; X. He; S. L. Li; D. G. Truhlar. MN15: A Kohn-Sham global-hybrid exchange-correlation density functional with broad accuracy for multi-reference and single-reference systems and noncovalent interactions. *Chem. Sci.* **2016**, *7*, 5032.
  15. A. D. Becke. Density-functional exchange-energy approximation with correct asymptotic behavior. *Phys. Rev. A Gen. Phys.* **1988**, *38*, 3098.
  16. S. Grimme; S. Ehrlich; L. Goerigk. Effect of the damping function in dispersion corrected density functional theory. *J. Comput. Chem.* **2011**, *32*, 1456.
  17. E. Cancès; B. Mennucci; J. Tomasi. A new integral equation formalism for the polarizable continuum model: Theoretical background and applications to isotropic and anisotropic dielectrics. *J. Chem. Phys.* **1997**, *107*, 3032.
  18. K. Wolinski; J. F. Hinton; P. Pulay. Efficient implementation of the gauge-independent atomic orbital method for NMR chemical shift calculations. *J. Am. Chem. Soc.* **1990**, *112*, 8251.
  19. N. M. O'Boyle; A. L. Tenderholt; K. M. Langner. cclib: A library for package-independent computational chemistry algorithms. *J. Comput. Chem.* **2008**, *29*, 839.
  20. E. J. Leonhardt; R. Jasti. Emerging applications of carbon nanohoops. *Nat. Rev. Chem.* **2019**, *3*, 672.
